# Supplementary material for: Evaluating the mutagenic potential of aerosol organic compounds using informatics based screening
Source: Copernicus journal article supplement (doi:10.5194/acp-2017-574), 2017-07-17
Supplement: Supplementary file 1 [file TableS1.xlsx]

## Sheet: Foglio1
SOA class	compound ID	SMILES	IUPAC name	common name	references
Isoprene SOA	iso_01	OCC(O)C(C)(O)CO	2-methylbutane-1,2,3,4-tetrol	2-methyl-tetrol	Claeys, M.; Graham, B.; Vas, G.; Wang,W.; Vermeylen, R.; Pashynska, V.; Cafmeyer, J.; Guyon, P.; Andreae, M. O.; Araxo, P.; Maenhaut, W. Science, 2004, 303, 1173–1176.
	iso_02	O=S(=O)(O)OCC(O)C(C)(O)CO	2,3,4-trihydroxy-3-methylbutyl hydrogen sulfate	2-methyl-tetrol sulfate ester	Carlton, A. G.; Wiedinmyer, C.; Kroll, J. H. Atmos. Chem. Phys., 2009, 9, 4987–5005.
	iso_03	O=S(=O)(O)OCC(O)C(C)(O)CO[N+]([O-])=O	2,3-dihydroxy-3-methyl-4-(nitrooxy)butyl hydrogen sulfate	C5 trihydroxy nitrate sulfate ester	Carlton, A. G.; Wiedinmyer, C.; Kroll, J. H. Atmos. Chem. Phys., 2009, 9, 4987–5005.
	iso_04	O\C=C(/C)C(O)CO	(3E)-3-methylbut-3-ene-1,2,4-triol	dehydro-2-methyl-tetrol (enol form)	Carlton, A. G.; Wiedinmyer, C.; Kroll, J. H. Atmos. Chem. Phys., 2009, 9, 4987–5005.
	iso_05	CC1(O)COCC1O	3-methyloxolane-3,4-diol	3-MeTHF-3,4-diol	Lin, Y.-H.; Zhang, Z.; Docherty, K. S.; Zhang, H.; Budisulistiorini, S. H.; Rubitschun, C. L.; Shaw, S. L.; Knipping, E. M.; Edgerton, E. S.; Kleindienst, T. E.; Gold, A.; Surratt, J. Environ. Sci. Technol., 2012, 46, 250–258.
	iso_06	O=C(O)C(C)(O)CO	2,3-dihydroxy-2-methylpropanoic acid	2-methyl-glyceric acid	Carlton, A. G.; Wiedinmyer, C.; Kroll, J. H. Atmos. Chem. Phys., 2009, 9, 4987–5005.
	iso_07	CC(CO)(OS(=O)(=O)O)C(=O)O	3-hydroxy-2-methyl-2-(sulfooxy)propanoic acid	2-methyl-glyceric acid sulfate ester	Carlton, A. G.; Wiedinmyer, C.; Kroll, J. H. Atmos. Chem. Phys., 2009, 9, 4987–5005.
	iso_08	O=[N+]([O-])OOC(=O)C(C)(O[N+]([O-])=O)CO	3-hydroxy-2-methyl-1-(nitroperoxy)-1-oxopropan-2-yl nitrate	C4-hydroxynitrate-PAN	Surratt, J. D.; Chan, A. W. H.; Eddingaas, N. C.; Chan, M. N.; Loza, C. L.; Kwan, A. J.; Hersey, S. P.; Flagan, R. C.; Wennberg, P. O.; Seinfeld, J. H. Proc. Natl. Acad. Sci., 2010, 107, 6640 – 6645.
Dicarbonyl (C2-C3) SOA	dic_01	OC(O)C(O)O	ethane-1,1,2,2-tetrol	glyoxal (hydrated)	Aumont, B.; Madronich, S.; Bey, I.; Tyndall, G. S. J. Atmos. Chem., 2000, 35, 59 - 75.
	dic_02	O=CC(O)OS(=O)(=O)O	1-hydroxy-2-oxoethyl hydrogen sulfate	glyoxal sulfate ester	Surratt, J. D.; Kroll, J. H.; Kleindienst, T. E.; Edney, E. O.; Claeys, M.; Sorooshian, A.; Ng, N. L.; Offenberg, J. H.; Lewandowski, M.; Jaoui, M.; Flagan, R. C.; Seinfeld, J. H. Environ. Sci. Technol., 2007, 41, 517-527
	dic_03	O=C(C)C(O)OS(=O)(=O)O	1-hydroxy-2-oxopropyl hydrogen sulfate	methylglyoxal sulfate ester	Surratt, J. D.; Kroll, J. H.; Kleindienst, T. E.; Edney, E. O.; Claeys, M.; Sorooshian, A.; Ng, N. L.; Offenberg, J. H.; Lewandowski, M.; Jaoui, M.; Flagan, R. C.; Seinfeld, J. H. Environ. Sci. Technol., 2007, 41, 517-527
	dic_04	O=C(O)C(O)C(=O)O	hydroxypropanedioic acid	tartronic acid	Lim, Y. B.; Tan, Y.; Perri, M. J.; Seitzinger, S. P.; Turpin, B. J. Atmos. Chem. Phys., 2010, 10, 10521–10539.
	dic_05	O=C(O)C(=O)CC(=O)O	2-oxobutanedioic acid	dehydro-tartaric acid	Lim, Y. B.; Tan, Y.; Perri, M. J.; Seitzinger, S. P.; Turpin, B. J. Atmos. Chem. Phys., 2010, 10, 10521–10539.
	dic_06	OC(=O)C(O)C(C)(O)C(O)=O	2,3-dihydroxy-2-methylbutanedioic acid	methyl-tartaric acid	Lim, Y. B.; Tan, Y.; Perri, M. J.; Seitzinger, S. P.; Turpin, B. J. Atmos. Chem. Phys., 2010, 10, 10521–10539.
	dic_07	CC(O)(C(=O)O)C(C)(O)C(O)=O	2,3-dihydroxy-2,3-dimethylbutanedioic acid	dimethyl-tartaric acid	Herrmann, H.; Schaefer, T.; Tilgner, A.; Styler, S. A.; Weller, C.; Teich, M.; Otto, T.; Chem. Rev., 2015, 115, 4259–4334.
	dic_08	OC(=O)C(C)(O)OC(C)C(C)=O	2-hydroxy-2-[(3-oxobutan-2-yl)oxy]propanoic acid	acetoin - pyruvic acid hemiacetal	Herrmann, H.; Schaefer, T.; Tilgner, A.; Styler, S. A.; Weller, C.; Teich, M.; Otto, T.; Chem. Rev., 2015, 115, 4259–4334.
	dic_09	C[n+]1cc(C)n(C)c1C(=O)CC(O)C(C)=O	2-(3-hydroxy-4-oxopentanoyl)-1,3,5-trimethyl-1H-imidazol-3-ium	glyoxal imidazole	De Haan, D. O.; Hawkins, L. N.; Kononenko, J. A.; Turley, J. J.; Corrigan, A. L.; Tolbert, M. A.; Jimenez, J. L. Environ. Sci. Technol., 2011, 45, 984–991
Alkenes ozonolysis SOA	ken_01	CC(OOC(C)OOC(C)OO)OOCC	1-[(1-{[1-(ethylperoxy)ethyl]peroxy}ethyl)peroxy]ethane-1-peroxol	peroxide oligomers from ethyl-proponyl-ether ozonolysis	Sadezky, A.; Chaimbault, P.; Mellouki, A.; Römpp, A.; Winterhalter, R.; Le Bras, G.; Moortgat, G. K. Atmos. Chem. Phys., 2006, 6, 5009–5024.
	ken_02	O=C(CCC(OO)C(=O)OO)C(=O)CO	2-hydroperoxy-7-hydroxy-5,6-dioxoheptaneperoxoic acid	"highly oxidized multifunctional compounds" from cyclohexene ozonolysis	Rissanen, M. P.; Kurtén, T.; Sipilä, M.; Thornton, J. A.; Kangasluoma, J.; Sarnela, N.; Junninen, H.; Jørgensen, S.; Schallhart, S.; Kajos, M. K.; Taipale, R.; Springer, M.; Mentel, T. F.; Ruuskanen, T.; Petäjä, T.; Worsnop, D. R.; Kjaergaard, H. G.; Ehn, M. J. Am. Chem. Soc., 2014, 136, 15596 - 15606.
	ken_03	O=C(CCCC(=O)OO)C(=O)CO	7-hydroxy-5,6-dioxoheptaneperoxoic acid	"highly oxidized multifunctional compounds" from cyclohexene ozonolysis	Rissanen, M. P.; Kurtén, T.; Sipilä, M.; Thornton, J. A.; Kangasluoma, J.; Sarnela, N.; Junninen, H.; Jørgensen, S.; Schallhart, S.; Kajos, M. K.; Taipale, R.; Springer, M.; Mentel, T. F.; Ruuskanen, T.; Petäjä, T.; Worsnop, D. R.; Kjaergaard, H. G.; Ehn, M. J. Am. Chem. Soc., 2014, 136, 15596 - 15606.
Alkane photooxidation SOA	kan_01	O=[N+]([O-])OC(CCC(CCCCCCC)O[N+]([O-])=O)CCC	tetradecane-4,7-diyl dinitrate	C14 n-alkane photooxidation product (nitrooxy substituted)	Lim, Y. B.; and Ziemann, P. J. Environ. Sci. Technol., 2005, 39, 9229-9236
	kan_02	CCCCCCCC(CCC(=O)CCC)O[N+]([O-])=O	4-oxotetradecan-7-yl nitrate	C14 n-alkane photooxidation product (nitrooxy, oxo substituted)	Lim, Y. B.; and Ziemann, P. J. Environ. Sci. Technol., 2005, 39, 9229-9236
	kan_03	O=[N+]([O-])OC(CCCC)CCC(O)CCC(CCC)O[N+]([O-])=O		C14 n-alkane photooxidation product (di-nitrooxy, hydroxy substituted)	Lim, Y. B.; and Ziemann, P. J. Environ. Sci. Technol., 2005, 39, 9229-9236
	kan_04	OC1(CCC(CCC)O[N+]([O-])=O)OC(CC1O)CCCC	1-(5-butyl-2,3-dihydroxyoxolan-2-yl)hexan-3-yl nitrate	C14 n-alkane photooxidation product (nitrooxy, di-hydroxy substituted tetrahydrofuran form)	Lim, Y. B.; and Ziemann, P. J. Environ. Sci. Technol., 2005, 39, 9229-9236
	kan_05	OC1(CCC(CCC)O[N+]([O-])=O)OC(CC1=O)CCCC	1-(5-butyl-2-hydroxy-3-oxooxolan-2-yl)hexan-3-yl nitrate	C14 n-alkane photooxidation product (nitrooxy, oxo, hydroxy substituted tetrahydrofuran form)	Lim, Y. B.; and Ziemann, P. J. Environ. Sci. Technol., 2005, 39, 9229-9236
	kan_06	CCCCC1CC=C(CCC(CCC)O[N+]([O-])=O)O1	1-(5-butyl-4,5-dihydrofuran-2-yl)hexan-3-yl nitrate	C14 n-alkane photooxidation product (nitrooxy substituted dihydrofuran form)	Lim, Y. B.; and Ziemann, P. J. Environ. Sci. Technol., 2005, 39, 9229-9236
Monoterpene SOA	mtr_01	OC2CC1CC(C1(C)C)C2(C)O[N+]([O-])=O	3-hydroxy-2,6,6-trimethylbicyclo[3.1.1]heptan-2-yl nitrate	nitrooxy compound from a-pinene	Pinho, P. G.; Pio, C. A.; Carter, W. P. L.; Jenkin, M. E. J. Atmos. Chem., 2007, 57, 171–202.
	mtr_02	O=S(=O)(O)OC1(C)C2CC(CC1O[N+]([O-])=O)C2(C)C	2,6,6-trimethyl-3-(nitrooxy)bicyclo[3.1.1]heptan-2-yl hydrogen sulfate	nitrooxy organosulfate from a-pinene, b-pinene	Kristensen, K.; and Glasius, M. Atmos. Environ., 2011, 45, 4546 - 4556.
	mtr_03	OOC1CC2CC(C1=O)C2(C)C	3-hydroperoxy-6,6-dimethylbicyclo[3.1.1]heptan-2-one	hydroperoxy-nopinone	Heaton, K. J.; Dreyfus, M. A.; Wang, S.; Johnston M. V. Environ. Sci. Technol., 2007, 41, 6129-6136
	mtr_04	O=C(C)C1C[C@H](CC=O)C1(C)C	[(1R,3R)-3-acetyl-2,2-dimethylcyclobutyl]acetaldehyde	pinonaldehyde	Jaoui, M.; and Kamens, R. M., J. Geophys. Res., 2011, 106, D12, 12541 - 12558.
	mtr_05	OC(=O)C[C@H]1CC(C(C)=O)C1(C)C	[(1R,3R)-3-acetyl-2,2-dimethylcyclobutyl]acetic acid	pinonic acid	Jaoui, M.; and Kamens, R. M., J. Geophys. Res., 2011, 106, D12, 12541 - 12558.
	mtr_06	OC(=O)C[C@H]1CC(C(=O)CO)C1(C)C	[(1R,3R)-3-(hydroxyacetyl)-2,2-dimethylcyclobutyl]acetic acid	hydroxy-pinonic acid	Jaoui, M.; and Kamens, R. M., J. Geophys. Res., 2011, 106, D12, 12541 - 12558.
	mtr_07	OC(=O)C[C@H]1CC(C(=O)O)C1(C)C	(1R,3R)-3-(carboxymethyl)-2,2-dimethylcyclobutane-1-carboxylic acid	pinic acid	Jaoui, M.; and Kamens, R. M., J. Geophys. Res., 2011, 106, D12, 12541 - 12558.
	mtr_08	OC(=O)C[C@H]1CC(C(=O)OO[N+]([O-])=O)C1(C)C	{(1R,3R)-2,2-dimethyl-3-[(nitroperoxy)carbonyl]cyclobutyl}acetic acid	peroxy-acyl-nitrate from a-pinene, b-pinene oxidation	Kamens, R. M.; and Jaoui, M. Environ. Sci. Technol., 2001, 35, 1394 - 1405.
	mtr_09	OC(=O)C[C@H]1CC(C(=O)OS(=O)(=O)O)C1(C)C	{(1R,3R)-2,2-dimethyl-3-[(sulfooxy)carbonyl]cyclobutyl}acetic acid	organosulfate from a-pinene, b-pinene	Kristensen, K.; and Glasius, M. Atmos. Environ., 2011, 45, 4546 - 4556.
	mtr_10	CC1(C)OC(=O)CC1CCC(=O)O	3-(2,2-dimethyl-5-oxooxolan-3-yl)propanoic acid	homoterpenyllic acid	Yasmeen, F.; Vermeylen, R.; Szmigielski, R.; Iinuma, Y.; Böge, O.; Herrmann, H.; Maenhaut, W.; Claeys, M. Atmos. Chem. Phys., 2010, 10, 9383–9392.
	mtr_11	CC1(C)OC(=O)CC1CC(=O)O	(2,2-dimethyl-5-oxooxolan-3-yl)acetic acid	terpenylic acid	Claeys, M.; Iinuma, Y.; Szmigielski, R.; Surratt, J. D.; Blockhuys, F.; Van Alsenoy, C.; Boge, O.; Sierau, B.; Gomex-Gonzalez, Y.; Vermeylen, R.; Van der Veken, P.; Shahgholi, M.; Chan, A. W. H.; Hermann, H.; Seinfeld, J. H.; Maenhaut, W. Environ. Sci. Technol., 2009, 43, 6976–6982.
	mtr_12	OC(=O)C1CC(=O)OC1(C)C	2,2-dimethyl-5-oxooxolane-3-carboxylic acid	terebic acid	Yasmeen, F.; Vermeylen, R.; Szmigielski, R.; Iinuma, Y.; Böge, O.; Herrmann, H.; Maenhaut, W.; Claeys, M. Atmos. Chem. Phys., 2010, 10, 9383–9392.
	mtr_13	CC(C)(O)C(CC(=O)O)CC(O)=O	3-(2-hydroxypropan-2-yl)pentanedioic acid	diaterpenylic acid	Yasmeen, F.; Vermeylen, R.; Szmigielski, R.; Iinuma, Y.; Böge, O.; Herrmann, H.; Maenhaut, W.; Claeys, M. Atmos. Chem. Phys., 2010, 10, 9383–9392.
	mtr_14	CC(C)(OC(=O)C)C(CC(O)=O)CC(=O)O	3-[2-(acetyloxy)propan-2-yl]pentanedioic acid	diaterpenylic acid acetate	Claeys, M.; Iinuma, Y.; Szmigielski, R.; Surratt, J. D.; Blockhuys, F.; Van Alsenoy, C.; Boge, O.; Sierau, B.; Gomex-Gonzalez, Y.; Vermeylen, R.; Van der Veken, P.; Shahgholi, M.; Chan, A. W. H.; Hermann, H.; Seinfeld, J. H.; Maenhaut, W. Environ. Sci. Technol., 2009, 43, 6976–6982.
	mtr_15	CC1(C)[C@H](CC1CC(=O)OC(C)(C)C(CC(=O)O)CC(=O)O)C(=O)O		pinyl-diaterpenyl ester	Yasmeen, F.; Vermeylen, R.; Szmigielski, R.; Iinuma, Y.; Böge, O.; Herrmann, H.; Maenhaut, W.; Claeys, M. Atmos. Chem. Phys., 2010, 10, 9383–9392.
	mtr_16	CC1(C)[C@H](CC1CC(=O)OC(C)(C)C(CC(=O)O)C(=O)O)C(=O)O		pinyl-diaterebyl ester	Yasmeen, F.; Vermeylen, R.; Szmigielski, R.; Iinuma, Y.; Böge, O.; Herrmann, H.; Maenhaut, W.; Claeys, M. Atmos. Chem. Phys., 2010, 10, 9383–9392.
	mtr_17	CC(C)(C(CC(O)=O)C(=O)O)C(=O)O	3-methylbutane-1,2,3-tricarboxylic acid	3-methyl-1,2,3-butanetricarboxylic acid (MBTCA)	Szmigielski, R.; Surratt, J. D.; Gomez-Gonzalez, Y.; Van der Veken, P.; Kourtchev, I.; Vermeylen, R.; Blockhuys, F.; Jaoui, M.; Kleindienst, T. E.; Lewandowski, M.; Offenberg, J. H.; Edney, E. O.; Seinfeld, J. H.; Maenhaut, W.; Claeys, M. Geophys. Res. Lett., 2007, 34, L24811, doi:10.1029/2007gl031338.
	mtr_18	CC(C)(C(=O)O)C(O)CC(O)=O	3-hydroxy-2,2-dimethylpentanedioic acid	3-hydroxy-4,4-dimethylglutaric acid	Claeys, M.; Szmigielski, R.; Kourtchev, I.; Van der Veken, P.; Vermeylen, R.; Maenhaut, W.; Jaoui, M.; Kleindienst, T. E.; Lewandowski, M.; Offenbgerg, J. H.; Odney, E. O. Environ. Sci. Technol., 2007, 41, 1628-1634.
	mtr_19	OC(=O)C(O)CC(CC(=O)O)C(C)C	2-hydroxy-4-(propan-2-yl)hexanedioic acid	2-hydroxy-4-isopropyladipic acid	Claeys, M.; Szmigielski, R.; Kourtchev, I.; Van der Veken, P.; Vermeylen, R.; Maenhaut, W.; Jaoui, M.; Kleindienst, T. E.; Lewandowski, M.; Offenbgerg, J. H.; Odney, E. O. Environ. Sci. Technol., 2007, 41, 1628-1634.
	mtr_20	O=S(O)(=O)OC(CC(C=O)C(C)(C)C=O)C(C)=O	5-formyl-6,6-dimethyl-2,7-dioxoheptan-3-yl hydrogen sulfate	organosulfate from a-pinene	Surratt, J. D.; Kroll, J. H.; Kleindienst, T. E.; Edney, E. O.; Claeys, M.; Sorooshian, A.; Ng, N. L.; Offenberg, J. H.; Lewandowski, M.; Jaoui, M.; Flagan, R. C.; Seinfeld, J. H. Environ. Sci. Technol., 2007, 41, 517-527
	mtr_21	CC(C)(OO)C(CC(=O)C(=O)CO)CO	6-hydroperoxy-1-hydroxy-5-(hydroxymethyl)-6-methylheptane-2,3-dione	hydroperoxy, open-ring product of a-pinene oxidation	Jenkin, M. E. Atmos. Chem. Phys., 2004, 4, 1741–1757.
	mtr_22	OOC(C)(C)C1CC(O)=C(C)C(=O)C1	5-(2-hydroperoxypropan-2-yl)-3-hydroxy-2-methylcyclohex-2-en-1-one	hydroperoxy-hydroxy-menthen-2-one	Vereecken, L.; Müller, J.-F.; Peeters, J. Phys. Chem. Chem. Phys., 2007, 9, 5241–5248
	mtr_23	OOC(=O)[C@@]1(OO)CC([C@H](OO)C(C)=O)C1(C)C		"highly oxidized multifunctional compounds" from a-pinene ozonolysis	Mentel, T. F.; Springer, M.; Ehn, M.; Kleist, E.; Pullinen, I.; Kurtén, T.; Rissanen, M.; Wahner, A.; Wildt, A. Atmos. Chem. Phys., 2015, 15, 6745–6765.
	mtr_24	OOC(=O)[C@@]1(OO)CC(C(=O)C(C)=O)C1(C)C		"highly oxidized multifunctional compounds" from a-pinene ozonolysis	Mentel, T. F.; Springer, M.; Ehn, M.; Kleist, E.; Pullinen, I.; Kurtén, T.; Rissanen, M.; Wahner, A.; Wildt, A. Atmos. Chem. Phys., 2015, 15, 6745–6765.
	mtr_25	O=CC[C@@H]2CC([C@H]1OCOO1)C2(C)C		secondary ozonide between a-pinene oxidation products and formaldehyde	Gäb, S.; Hellpointner, E.; Turner, W. V.; Korte, F. Nature, 1985, 316, 535 - 536.
	mtr_26	O=C(O)C[C@H]1CC(C1(C)C)[C@@]2(C)O[C@H](OO2)C3C[C@@H](CC=O)C3(C)C		a-pinene oxidation product dimer with secondary ozonide	Tolocka, M. P.; Heaton, K.J.; Dreyfus, M. A.; Wang, S.; Zordan, C. A.; Saul, T. D.; Johnston, M. V. Environ. Sci. Technol., 2006, 40, 1843 - 1848..
	mtr_27	O=C(O)[C@@H]4CC(CC1OC3(OO1)CCC2CC3C2(C)C)C4(C)C		b-pinene oxidation product dimer with secondary ozonide	Heaton, K. J.; Dreyfus, M. A.; Wang, S.; Johnston M. V. Environ. Sci. Technol., 2007, 41, 6129-6136.
	mtr_28	O=C(O)CC(CCC(C)=O)C1(C)OCOO1	3-(3-methyl-1,2,4-trioxolan-3-yl)-6-oxoheptanoic acid	secondary ozonide between d-limonene oxidation products and formaldehyde	Walser, M. L., Park, J., Gomez, A. L., Russell, A. R., Nizkorodov, S. A., J. Phys. Chem. A 2007, 111, 1907-1913.
	mtr_29	O=C(C)CCC(CC(=O)O)C(C)=O	3-acetyl-6-oxoheptanoic acid	keto-limononic acid	Larsen, B. R.; Di Bella, D.; Glasius, M.; Winterhalter, R.; Jensen, N. R.; Hjorth, J. J. Atmos. Chem., 2001, 38, 231 - 276.
	mtr_30	OC(=O)CCC(CC(=O)O)C(C)=O	3-acetylhexanedioic acid	limononic acid	Larsen, B. R.; Di Bella, D.; Glasius, M.; Winterhalter, R.; Jensen, N. R.; Hjorth, J. J. Atmos. Chem., 2001, 38, 231 - 276.
	mtr_31	OC(=O)CC1C(CC(C)=O)C1(C)C	[2,2-dimethyl-3-(2-oxopropyl)cyclopropyl]acetic acid	3-caronic acid	Yu, J.; Cocker, D. R.; Griffin, R. J.; Flagan, E. C.; Seinfeld, J. H. J. Atmos. Chem., 1999, 34, 207 - 258.
Sesquiterpene SOA	str_01	CC1(C)CC(C1CCC(=O)O)C(=O)CCC(=O)O	4-[2-(2-carboxyethyl)-3,3-dimethylcyclobutyl]-4-oxobutanoic acid	β-nocaryophyllinic acid	Alfarra, M. R.; Hamilton, J. F.; Wyche, K. P.; Good, N.; Ward, M. W.; Carr. T.; Barley, M. H.; Monks, P. S.; Jenkin, M. E.; Lewis, A. C.; McFiggans, G. B. Atmos. Chem. Phys., 2012, 12, 6417-6436.
Alkylbenzene SOA	alb_01	O=[N+]([O-])c1ccccc1O	2-nitrophenol	2-nitrophenol	Yuan, B.; Liggio, J.; Wentzell, J.; Li, S.-M.; Stark, H.; Roberts, J. M.; Gilman, J.; Lerner, B.; Warneke, C.; Li, R.; Leithead, A.; Osthoff, H. D.; Wild, R.; Brown, S. S.; de Gouw, J. A. Atmos. Chem. Phys., 2016, 16, 2139-2153.
	alb_02	Cc1ccccc1O	2-methylphenol	2-methylphenol	Ziemann, P.; and Atkinson, R. Chem. Soc. Rev., 2012, 41, 6582–6605
	alb_03	Cc1cc(C)cc(O)c1O	3,5-dimethylbenzene-1,2-diol	di-hydroxy-m-xylene	Huang, M.Q.; Hu, C.J.; Guo, X.Y.; Gu, X.J.; Zhao, W.X.; Wang, Z.Y.; Fang, L.; Zhang, W.J. Atmos. Poll. Res., 2014, 5, 73–78.
	alb_04	Cc1cc(C)cc(c1)C(O)=O	3,5-dimethylbenzoic acid	3,5-dimethylbenzoic acid	Huang, M.Q.; Hu, C.J.; Guo, X.Y.; Gu, X.J.; Zhao, W.X.; Wang, Z.Y.; Fang, L.; Zhang, W.J. Atmos. Poll. Res., 2014, 5, 73–78.
	alb_05	OC1C(=O)C=CC2OC12C	2-hydroxy-1-methyl-7-oxabicyclo[4.1.0]hept-4-en-3-one	a,b-unsaturated ketone with epoxide and hydroxyl functions from toluene oxidation	Ziemann, P.; and Atkinson, R. Chem. Soc. Rev., 2012, 41, 6582–6605
	alb_06	CC21OOC(C)(C=CC1(O)OO)C2O	2-hydroperoxy-1,5-dimethyl-6,7-dioxabicyclo[3.2.1]oct-3-ene-2,8-diol	endocyclic peroxy compound from m-xylene oxidation	Loza, C. L.; Chhabra, P. S.; Yee, L. D.; Craven, J. S.; Flagan, R. C.; Seinfeld, J. H. Atmos. Chem. Phys., 2012, 12, 151–167.
	alb_07	CC12OOC(C)(C=C(C)C1O[N+]([O-])=O)C2O	8-hydroxy-1,3,5-trimethyl-6,7-dioxabicyclo[3.2.1]oct-3-en-2-yl nitrate	endocyclic peroxy compound from 1,3,5-trimethyl-benzene oxidation	Rickard, A. R.; Wyche, K. P.; Metzger, A.; Monks, P. S.; Ellis, A. M.; Dommen, J.; Baltensperger, U.; Jenkin, M. E.; Pilling, M. J. Atmos. Environ., 2010, 44, 5423–5433
	alb_08	CC12OOC(C)(C=C(C)C1OO)C2O	4-hydroperoxy-1,3,5-trimethyl-6,7-dioxabicyclo[3.2.1]oct-2-en-8-ol	endocyclic peroxy compound from 1,3,5-trimethyl-benzene oxidation	Rickard, A. R.; Wyche, K. P.; Metzger, A.; Monks, P. S.; Ellis, A. M.; Dommen, J.; Baltensperger, U.; Jenkin, M. E.; Pilling, M. J. Atmos. Environ., 2010, 44, 5423–5433
	alb_09	CC12OOC(C)(C=C(C)C1=O)C2O	8-hydroxy-1,3,5-trimethyl-6,7-dioxabicyclo[3.2.1]oct-3-en-2-one	endocyclic peroxy compound from 1,3,5-trimethyl-benzene oxidation	Rickard, A. R.; Wyche, K. P.; Metzger, A.; Monks, P. S.; Ellis, A. M.; Dommen, J.; Baltensperger, U.; Jenkin, M. E.; Pilling, M. J. Atmos. Environ., 2010, 44, 5423–5433
	alb_10	OOC1(C)C(=O)OC(C)C1O	3-hydroperoxy-4-hydroxy-3,5-dimethyloxolan-2-one	hydroxy-hydroperoxy-g-lactone from 1,3,5-trimethyl-benzene oxidation	Rickard, A. R.; Wyche, K. P.; Metzger, A.; Monks, P. S.; Ellis, A. M.; Dommen, J.; Baltensperger, U.; Jenkin, M. E.; Pilling, M. J. Atmos. Environ., 2010, 44, 5423–5433
	alb_11	O=[N+]([O-])OC1C(C)OC(=O)C1(C)OO	4-hydroperoxy-2,4-dimethyl-5-oxooxolan-3-yl nitrate	nitroxy-hydroperoxy-g-lactone from 1,3,5-trimethyl-benzene oxidation	Rickard, A. R.; Wyche, K. P.; Metzger, A.; Monks, P. S.; Ellis, A. M.; Dommen, J.; Baltensperger, U.; Jenkin, M. E.; Pilling, M. J. Atmos. Environ., 2010, 44, 5423–5433
	alb_12	CC1(C=O)OC1C(O)C(OO)C(C)=O	3-(2-hydroperoxy-1-hydroxy-3-oxobutyl)-2-methyloxirane-2-carbaldehyde	ring-opening product of 1,3,5-trimethyl-benzene oxidation with epoxide function	Loza, C. L.; Chhabra, P. S.; Yee, L. D.; Craven, J. S.; Flagan, R. C.; Seinfeld, J. H. Atmos. Chem. Phys., 2012, 12, 151–167.
	alb_13	CC1(C=O)OC1C(O)C(=O)C(C)=O	3-(1-hydroxy-2,3-dioxobutyl)-2-methyloxirane-2-carbaldehyde	ring-opening product of 1,3,5-trimethyl-benzene oxidation with epoxide function	Loza, C. L.; Chhabra, P. S.; Yee, L. D.; Craven, J. S.; Flagan, R. C.; Seinfeld, J. H. Atmos. Chem. Phys., 2012, 12, 151–167.
	alb_14	CC1(C=O)OC1C(/C)=C/C(C)=O	2-methyl-3-[(2E)-4-oxopent-2-en-2-yl]oxirane-2-carbaldehyde	ring-opening product of 1,3,5-trimethyl-benzene oxidation with epoxide function	Metzger, A.; Dommen, J.; Gaeggeler, K.; Duplissy, J.; Prevot, A. S. H.; Kleffmann, J.; Elshorbany, Y.; Wisthaler, A.; Baltensperger, U. Atmos. Chem. Phys., 2008, 8, 6453–6468.
	alb_15	C\C(=C/C(C)=O)C(O)C(C)(O)C(O)=O	(4E)-2,3-dihydroxy-2,4-dimethyl-6-oxohept-4-enoic acid	ring-opening product of 1,3,5-trimethyl-benzene oxidation with hydroxyl functions	Sato, K.; Takami, A.; Kato, Y.; Seta, T.; Fujitani, Y.; Hikida, T.; Shimono, A.; Imamura, T. Atmos. Chem. Phys., 2012, 12, 4667–4682.
	alb_16	OC(C)(C(O)C(C)(O)C(O)=O)C(=O)C(C)=O	2,3,4-trihydroxy-2,4-dimethyl-5,6-dioxoheptanoic acid	ring-opening product of 1,3,5-trimethyl-benzene oxidation with hydroxyl functions	Sato, K.; Takami, A.; Kato, Y.; Seta, T.; Fujitani, Y.; Hikida, T.; Shimono, A.; Imamura, T. Atmos. Chem. Phys., 2012, 12, 4667–4682.
	alb_17	O=C(O)C(C)(O)C(=O)C(C)C(=O)O	2-hydroxy-2,4-dimethyl-3-oxopentanedioic acid	ring-opening product of 1,3,5-trimethyl-benzene oxidation with hydroxyl function	Sato, K.; Takami, A.; Kato, Y.; Seta, T.; Fujitani, Y.; Hikida, T.; Shimono, A.; Imamura, T. Atmos. Chem. Phys., 2012, 12, 4667–4682.
	alb_18	O=C(O)\C=C(\C)C(=O)O	(2Z)-2-methylbut-2-enedioic acid	methyl-maleic acid	Praplan, A. P.; Hegyi-Gaeggeler, K.; Barmet, P.; Pfaffenberger, L.; Dommen, J.; Baltensperger, U.; Atmos. Chem. Phys., 2014, 14, 8665-8677.
low MW PAH SOA	lmp_01	Oc2cccc1ccccc12	naphthalen-1-ol	naphthol	Kautzman, K. E.; Surratt, J. D.; Chan, M. N.; Chan, A. W. H.; Herse, S. P.; Chhabra, P. S.; Dalleska, N. F.; Wennberg, P. O.; Flagan, R. C.; Seinfeld, J. H. J. Phys. Chem. A, 2010, 114, 913–934.
	lmp_02	O=C2C=CC(=O)c1ccccc12	naphthalene-1,4-dione	naphthoquinone	Kautzman, K. E.; Surratt, J. D.; Chan, M. N.; Chan, A. W. H.; Herse, S. P.; Chhabra, P. S.; Dalleska, N. F.; Wennberg, P. O.; Flagan, R. C.; Seinfeld, J. H. J. Phys. Chem. A, 2010, 114, 913–934.
	lmp_03	O=Cc1ccccc1/C=C\C=O	2-[(1Z)-3-oxoprop-1-en-1-yl]benzaldehyde	C10 dicarbonyl from naphathalene oxidation	Kautzman, K. E.; Surratt, J. D.; Chan, M. N.; Chan, A. W. H.; Herse, S. P.; Chhabra, P. S.; Dalleska, N. F.; Wennberg, P. O.; Flagan, R. C.; Seinfeld, J. H. J. Phys. Chem. A, 2010, 114, 913–934.
	lmp_04	O=Cc1ccccc1/C=C/C(=O)O	(2E)-3-(2-formylphenyl)prop-2-enoic acid	C10 oxo-carboxylic acid from naphathalene oxidation	Kautzman, K. E.; Surratt, J. D.; Chan, M. N.; Chan, A. W. H.; Herse, S. P.; Chhabra, P. S.; Dalleska, N. F.; Wennberg, P. O.; Flagan, R. C.; Seinfeld, J. H. J. Phys. Chem. A, 2010, 114, 913–934.
	lmp_05	OC(=O)c1ccccc1/C=C/C(=O)O	2-[(E)-2-carboxyethenyl]benzoic acid	C10 dicarboxylic acid from naphathalene oxidation	Kautzman, K. E.; Surratt, J. D.; Chan, M. N.; Chan, A. W. H.; Herse, S. P.; Chhabra, P. S.; Dalleska, N. F.; Wennberg, P. O.; Flagan, R. C.; Seinfeld, J. H. J. Phys. Chem. A, 2010, 114, 913–934.
	lmp_06	Oc1ccc(O)cc1/C=C/C(=O)O	(2E)-3-(2,5-dihydroxyphenyl)prop-2-enoic acid	C10 dihydroxy-carboxylic acid from naphathalene oxidation	Kautzman, K. E.; Surratt, J. D.; Chan, M. N.; Chan, A. W. H.; Herse, S. P.; Chhabra, P. S.; Dalleska, N. F.; Wennberg, P. O.; Flagan, R. C.; Seinfeld, J. H. J. Phys. Chem. A, 2010, 114, 913–934.
	lmp_07	OC(=O)c1ccccc1C(=O)O	benzene-1,2-dicarboxylic acid	phthalic acid	Kautzman, K. E.; Surratt, J. D.; Chan, M. N.; Chan, A. W. H.; Herse, S. P.; Chhabra, P. S.; Dalleska, N. F.; Wennberg, P. O.; Flagan, R. C.; Seinfeld, J. H. J. Phys. Chem. A, 2010, 114, 913–934.
	lmp_08	OC(=O)c1c(c(O)ccc1O)C(=O)O	3,6-dihydroxybenzene-1,2-dicarboxylic acid	dihydroxy-phthalic acid	Kautzman, K. E.; Surratt, J. D.; Chan, M. N.; Chan, A. W. H.; Herse, S. P.; Chhabra, P. S.; Dalleska, N. F.; Wennberg, P. O.; Flagan, R. C.; Seinfeld, J. H. J. Phys. Chem. A, 2010, 114, 913–934.
	lmp_09	Oc1cc2c(cc1O)C(=O)C=CC2=O	6,7-dihydroxynaphthalene-1,4-dione	dihydroxy-naphthoquinone	Kautzman, K. E.; Surratt, J. D.; Chan, M. N.; Chan, A. W. H.; Herse, S. P.; Chhabra, P. S.; Dalleska, N. F.; Wennberg, P. O.; Flagan, R. C.; Seinfeld, J. H. J. Phys. Chem. A, 2010, 114, 913–934.
	lmp_10	[O-][N+](=O)c1ccc(O)c2ccccc12	4-nitronaphthalen-1-ol	nitro-naphthol	Kautzman, K. E.; Surratt, J. D.; Chan, M. N.; Chan, A. W. H.; Herse, S. P.; Chhabra, P. S.; Dalleska, N. F.; Wennberg, P. O.; Flagan, R. C.; Seinfeld, J. H. J. Phys. Chem. A, 2010, 114, 913–934.
	lmp_11	[O-][N+](=O)c2ccc(O)c1c2cccc1O	4-nitronaphthalene-1,8-diol	dihydroxy-nitro-naphthalene	Kautzman, K. E.; Surratt, J. D.; Chan, M. N.; Chan, A. W. H.; Herse, S. P.; Chhabra, P. S.; Dalleska, N. F.; Wennberg, P. O.; Flagan, R. C.; Seinfeld, J. H. J. Phys. Chem. A, 2010, 114, 913–934.
	lmp_12	[O-][N+](=O)OC2C=Cc1ccccc1C2O	1-hydroxy-1,2-dihydronaphthalen-2-yl nitrate	nitroxy-naphthol	Kautzman, K. E.; Surratt, J. D.; Chan, M. N.; Chan, A. W. H.; Herse, S. P.; Chhabra, P. S.; Dalleska, N. F.; Wennberg, P. O.; Flagan, R. C.; Seinfeld, J. H. J. Phys. Chem. A, 2010, 114, 913–934.
	lmp_13	O=C3Oc1ccccc1c2ccccc23	6H-dibenzo[b,d]pyran-6-one	phenanthrene oxidation product with d-lactone	Lee, J. Y.; Lane, D. A. Atmos. Environ., 2010, 44, 2469 - 2477.
	lmp_14	O=C1OC(=O)c2c3ccccc3ccc12	naphtho[1,2-c]furan-1,3-dione	phenanthrene oxidation product with anhydride	Lee, J. Y.; Lane, D. A. Atmos. Environ., 2010, 44, 2469 - 2477.
	lmp_15	O=Cc1c2ccccc2ccc1/C=C\C=O	2-[(1Z)-3-oxoprop-1-en-1-yl]naphthalene-1-carbaldehyde	dicarbonyl from phenanthrene oxidation	Lee, J. Y.; Lane, D. A. Atmos. Environ., 2010, 44, 2469 - 2477.
	lmp_16	O=C\C=C/c1c2ccccc2ccc1C=O	1-[(1Z)-3-oxoprop-1-en-1-yl]naphthalene-2-carbaldehyde	dicarbonyl from phenanthrene oxidation	Lee, J. Y.; Lane, D. A. Atmos. Environ., 2010, 44, 2469 - 2477.
	lmp_17	O=C3C=CC(=O)c2ccc1ccccc1c23	phenanthrene-1,4-dione	quinone from phenanthrene oxidation	Lee, J. Y.; Lane, D. A. Atmos. Environ., 2010, 44, 2469 - 2477.
	lmp_18	O=C2c3ccccc3c1ccccc1C2=O	phenanthrene-9,10-dione	quinone from phenanthrene oxidation	Lee, J. Y.; Lane, D. A. Atmos. Environ., 2010, 44, 2469 - 2477.
	lmp_19	O=Cc2ccccc2c1ccccc1C=O	[1,1'-biphenyl]-2,2'-dicarbaldehyde	dicarbonyl from phenanthrene oxidation	Lee, J. Y.; Lane, D. A. Atmos. Environ., 2010, 44, 2469 - 2477.
	lmp_20	Oc2cc3ccccc3c1ccccc12	phenanthren-9-ol	hydroxy-phenanthrene	Lee, J. Y.; Lane, D. A. Atmos. Environ., 2010, 44, 2469 - 2477.
	lmp_21	[O-][N+](=O)c2cc3ccccc3c1ccccc12	9-nitrophenanthrene	nitro-phenanthrene	Lee, J. Y.; Lane, D. A. Atmos. Environ., 2010, 44, 2469 - 2477.
	lmp_22	[O-][N+](=O)c3cccc1c3OC(=O)c2ccccc12	4-nitro-6H-dibenzo[b,d]pyran-6-one	phenanthrene oxidation product with d-lactone and nitro group	Lee, J. Y.; Lane, D. A. Atmos. Environ., 2010, 44, 2469 - 2477.
	lmp_23	[O-][N+](=O)c4ccc1ccc2cccc3ccc4c1c23		nitro-pyrene	Reisen, F.; Arey, J., Environ. Sci. Technol., 2005, 39, 64-73
Amine SOA	ara_01	O=NN2CCC[C@H]2c1cnccc1	3-[(2S)-1-nitrosopyrrolidin-2-yl]pyridine	N'-nitrosonornicotine	Farren, N. J.; Ramìrez, N.; Lee, J. D.; Finessi, E.; Lewis, A. C.; Hamilton, J. F. Environ. Sci. Technol., 2015, 49, 9648−9656.
	ara_02	CN(CCCC(=O)C1=CC=CN=C1)N=O	N-methyl-N-[4-oxo-4-(pyridin-3-yl)butyl]nitrous amide	4-(methylnitrosoamino)-1-(3-pyridyl)-1-butanone	Farren, N. J.; Ramìrez, N.; Lee, J. D.; Finessi, E.; Lewis, A. C.; Hamilton, J. F. Environ. Sci. Technol., 2015, 49, 9648−9656.
	ara_03	OC(CCCN(C)N=O)c1cccnc1	N-[4-hydroxy-4-(pyridin-3-yl)butyl]-N-methylnitrous amide	4-(Methylnitrosoamino)-1-(3-pyridyl)-1-butanol	Farren, N. J.; Ramìrez, N.; Lee, J. D.; Finessi, E.; Lewis, A. C.; Hamilton, J. F. Environ. Sci. Technol., 2015, 49, 9648−9656.
	ara_04	O=NN2CCCCC2c1cccnc1	3-(1-nitrosopiperidin-2-yl)pyridine	N′-nitrosoanabasine	Farren, N. J.; Ramìrez, N.; Lee, J. D.; Finessi, E.; Lewis, A. C.; Hamilton, J. F. Environ. Sci. Technol., 2015, 49, 9648−9656.
	ara_05	O=NN2CC=CCC2c1cccnc1	1-nitroso-1,2,3,6-tetrahydro-2,3'-bipyridine	N′-nitrosoanatabine	Farren, N. J.; Ramìrez, N.; Lee, J. D.; Finessi, E.; Lewis, A. C.; Hamilton, J. F. Environ. Sci. Technol., 2015, 49, 9648−9656.
