# Supplementary material for: Evaluating the mutagenic potential of aerosol organic compounds using informatics based screening
Source: Copernicus journal article supplement (doi:10.5194/acp-2017-574), 2017-07-17
Supplement: Supplementary file 2 [file TableS5.xlsx]

## Sheet: 2D_space_all
	PaDEL - Descriptor type	PaDEL Descriptors	Definition
PhysChem/electronic prop Descriptors	Weight	MW	Molecular weight
	XLogP	XLogP	LogP
	Topological polar surface area	TopoPSA	Topological polar surface area
	Molecular linear free energy relation	MLFER_S	Combined dipolarity/polarizability
	FMFDescriptor	FMF	Complexity of the molecule
	APol	apol	Polarizability: Sum of the atomic polarizabilities (including implicit hydrogens)
	Hbond donor count	nHBDon_Lipinski	Number of hydrogen bond donors (using Lipinski's definition: Any OH or NH. Each available hydrogen atom is counted as one hydrogen bond donor)
	Hbond acceptor count	nHBAcc_Lipinski	Number of hydrogen bond acceptors (using Lipinski's definition: any nitrogen; any oxygen)
	Van der Waals volume	VABC	Van der Waals volume calculated using the method proposed in [Zhao, Yuan H. and Abraham, Michael H. and Zissimos, Andreas M., Fast Calculation of van der Waals Volume as a Sum of Atomic and Bond Contributions and Its Application to Drug Compounds, The Journal of Organic Chemistry, 2003, 68:7368-7373]
	Extended topochemical atom	ETA_Epsilon_1	A measure of electronegative atom count
	Extended topochemical atom	ETA_dEpsilon_B	A measure of contribution of unsaturation
	Extended topochemical atom	ETA_dEpsilon_C	A measure of contribution of electronegativity
Constitutional descriptors	Constitutional	Sv
	Constitutional	Sse
	Constitutional	Spe
	Constitutional	Sare
	Constitutional	Sp
	Constitutional	Si
	Constitutional	Mv
	Constitutional	Mse
	Constitutional	Mpe
	Constitutional	Mare
	Constitutional	Mp
	Constitutional	Mi
	Atom count	nAtom	Number of atoms
	Atom count	nX	Number of halogen atoms (F, Cl, Br, I, At, Uus)
	Aromatic atoms count	naAromAtom	Number of aromatic atoms
	Number of aromatic bonds	nAromBond	Number of aromatic bonds
	Bond count	nBonds	Number of bonds (excluding bonds with hydrogen)
	Bond count	nBondsD2	Total number of double bonds (excluding bonds to aromatic bonds)
	Bond count	nBondsT	Number of triple bonds
	Rotatable bonds count	nRotBt	Number of rotatable bonds, including terminal bonds
	Ring count	nRing	Number of rings
	Ring count	nHeteroRing	Number of rings containing heteroatoms (N, O, P, S, or halogens)
	Ring count	nFRing	Number of fused rings
	Carbon types	C1SP1
	Carbon types	C2SP1
	Carbon types	C1SP2
	Carbon types	C2SP2
	Carbon types	C3SP2
	Carbon types	C1SP3
	Carbon types	C2SP3
	Carbon types	C3SP3
	Carbon types	C4SP3
Topological descriptors	Path count	MPC2	Molecular path count of order 2
	Path count	MPC3	Molecular path count of order 3
	Path count	MPC4	Molecular path count of order 4
	Path count	MPC5	Molecular path count of order 5
	Path count	MPC6	Molecular path count of order 6
	Path count	MPC7	Molecular path count of order 7
	Path count	MPC8	Molecular path count of order 8
	Path count	MPC9	Molecular path count of order 9
	Path count	MPC10	Molecular path count of order 10
	Walk counts	MWC2	Molecular walk count of order 2 (ln(1+x)
	Walk counts	MWC3	Molecular walk count of order 3 (ln(1+x)
	Walk counts	MWC4	Molecular walk count of order 4 (ln(1+x)
	Walk counts	MWC5	Molecular walk count of order 5 (ln(1+x)
	Walk counts	MWC6	Molecular walk count of order 6 (ln(1+x)
	Walk counts	MWC7	Molecular walk count of order 7 (ln(1+x)
	Walk counts	MWC8	Molecular walk count of order 8 (ln(1+x)
	Walk counts	MWC9	Molecular walk count of order 9 (ln(1+x)
	Walk counts	MWC10	Molecular walk count of order 10(ln(1+x)
	Extended topochemical atom	ETA_Eta_B	Branching index EtaB
Shape descriptors	Eccentric connectivity index	ECCEN	Molecular eccentricity: A topological descriptor combining distance and adjacency information
	Topological	topoDiameter	Topological diameter (maximum atom eccentricity)
	Topological	topoRadius	Topological radius (minimum atom eccentricity)
	Topological	topoShape	Petitjean topological shape index
	Extended topochemical atom	ETA_Shape_P	Shape index P
	Extended topochemical atom	ETA_Shape_Y	Shape index Y
	Extended topochemical atom	ETA_Shape_X	Shape index X

## Sheet: 2D_space_selected
	PaDEL - Descriptor type	PaDEL Descriptors	Definition
PhysChem/electronic prop Descriptors	Extended topochemical atom	ETA_dEpsilon_C	A measure of contribution of electronegativity
	XLogP	XLogP	LogP
Constitutional descriptors	Atom count	nAtom	Number of atoms
	Bond count	nBondsD2	Total number of double bonds (excluding bonds to aromatic bonds)
	Carbon types	C3SP2
	Carbon types	C1SP3
	Carbon types	C2SP3
	Carbon types	C3SP3
	Carbon types	C4SP3
	Ring count	nFRing	Number of fused rings
	Ring count	nHeteroRing	Number of rings containing heteroatoms (N, O, P, S, or halogens)
	Rotatable bonds count	nRotBt	Number of rotatable bonds, including terminal bonds
Topological descriptors	Extended topochemical atom	ETA_Eta_B	Branching index EtaB
	Path count	MPC2	Molecular path count of order 2
	Path count	MPC7	Molecular path count of order 7
Shape descriptors	Extended topochemical atom	ETA_Shape_X	Shape index X
	Topological	topoShape	Petitjean topological shape index

## Sheet: Physchem_all
			PhysChem/electronic properties	Descriptor	Description
			PaDEL	MW	molecular weight
				XLogP	LogP
				TopoPSA	polar surface area
				MLFER_S	Combined dipolarity/polarizability
				FMF	Complexity of the molecule
				apol	Polarizability: Sum of the atomic polarizabilities (including implicit hydrogens)
				nHBDon_Lipinski	H-bond donors: Number of hydrogen bond donors (using Lipinski's definition: Any OH or NH. Each available hydrogen atom is counted as one hydrogen bond donor)
				nHBAcc_Lipinski	H-bond acceptors: Number of hydrogen bond acceptors (using Lipinski's definition: any nitrogen; any oxygen)
				VABC	Van der Waals volume: calculated using the method proposed in [Zhao, Yuan H. and Abraham, Michael H. and Zissimos, Andreas M., Fast Calculation of van der Waals Volume as a Sum of Atomic and Bond Contributions and Its Application to Drug Compounds, The Journal of Organic Chemistry, 2003, 68:7368-7373]
			Percepta	Log(Koc)	Soil Organic Carbon-Water Partitioning Coefficient
				acd_LogP_galas	LogP Galas algorhitm
				acd_LogP_Consensus	LogP Consensus
				acd_LogP_Classic	LogP Classic
				acd_LogS_Intr_galas	Intrinsic solubility
				acd_LogS_pH7.4	Solubility at pH 7.4
				acd_LogS_purewater	Solubility in pure water
			QikProp	HOMO (eV)	Highest Occupied Molecular Orbital
				LUMO(eV)	Lowest Unoccupied Molecular Orbital

## Sheet: Physchem_selected
PhysChem/electronic properties	Descriptor	Description
Padel	apol	Combined dipolarity/polarizability
	FMF	Complexity of the molecule
	nHBAcc_Lipinski	Polarizability: Sum of the atomic polarizabilities (including implicit hydrogens)
	nHBDon_Lipinski	H-bond donors: Number of hydrogen bond donors (using Lipinski's definition: Any OH or NH. Each available hydrogen atom is counted as one hydrogen bond donor)
	MLFER_S	H-bond acceptors: Number of hydrogen bond acceptors (using Lipinski's definition: any nitrogen; any oxygen)
Percepta	acd_LogP_Consensus	LogP Consensus
QikProp	HOMO (eV)	Highest Occupied Molecular Orbital (elettronVolt)
	LUMO(eV)	Lowest Unoccupied Molecular Orbital (elettronVolt)

## Sheet: MechanisticDescriptors
Profiler	Descriptor
DNA alerts for AMES, MN and CA by OASIS v.1.3	AN2 >> Michael-type addition, quinoid structures >> Quinones
	AN2 >> Schiff base formation >> Dicarbonyl compounds
	Non-covalent interaction >> DNA intercalation >> Fused-Ring Nitroaromatics
	Non-covalent interaction >> DNA intercalation >> Quinones
	Radical >> Radical mechanism by ROS formation (indirect) or direct radical attack on DNA >> Organic Peroxy Compounds
	Radical >> Radical mechanism via ROS formation (indirect) >> Fused-Ring Nitroaromatics
	Radical >> Radical mechanism via ROS formation (indirect) >> Quinones
	SN1 >> Alkylation after metabolically formed carbenium ion species >> Polycyclic Aromatic Hydrocarbon Derivatives
	SN1 >> Nucleophilic attack after reduction and nitrenium ion formation >> Fused-Ring Nitroaromatics
	SN2 >> Alkylation, direct acting epoxides and related after P450-mediated metabolic activation >> Polycyclic Aromatic Hydrocarbon Derivatives
	No alerts (DNA alerts for AMES, MN and CA by OASIS v.1.3)
DNA binding by OASIS v.1.3	AN2 >> Michael-type addition on alpha, beta-unsaturated carbonyl compounds >> Four- and Five-Membered Lactones
	AN2 >> Nucleophilic addition to alpha, beta-unsaturated carbonyl compounds >> alpha, beta-Unsaturated Aldehydes
	AN2 >> Schiff base formation >> alpha, beta-Unsaturated Aldehydes
	Radical >> Radical mechanism via ROS formation (indirect) >> Nitrophenols, Nitrophenyl Ethers and Nitrobenzoic Acids
	SN1 >> Nucleophilic attack after carbenium ion formation >> N-Nitroso Compounds
	SN1 >> Nucleophilic attack after carbenium ion formation >> Specific Acetate Esters
	SN1 >> Nucleophilic attack after nitrenium and/or carbenium ion formation >> N-Nitroso Compounds
	SN1 >> Nucleophilic attack after reduction and nitrenium ion formation >> Nitrophenols, Nitrophenyl Ethers and Nitrobenzoic Acids
	SN2 >> Acylation >> Specific Acetate Esters
	SN2 >> Alkylation, direct acting epoxides and related >> Epoxides and Aziridines
	SN2 >> Alkylation, ring opening SN2 reaction >> Four- and Five-Membered Lactones
	SN2 >> Nucleophilic substitution at sp3 Carbon atom >> Specific Acetate Esters
	No alerts(DNA binding OASIS v.1.3)
DNA binding by OECD	Michael addition >> P450 Mediated Activation to Quinones and Quinone-type Chemicals >> Alkyl phenols
	Michael addition >> P450 Mediated Activation to Quinones and Quinone-type Chemicals >> Hydroquinones
	Michael addition >> Polarised Alkenes-Michael addition >> Alpha, beta- unsaturated ketones
	Michael addition >> Quinones and Quinone-type Chemicals >> Quinones
	Schiff base formers >> Direct Acting Schiff Base Formers >> Alpha-beta-dicarbonyl
	Schiff base formers >> Direct Acting Schiff Base Formers >> Mono aldehydes
	SN1 >> Carbenium Ion Formation >> N-Nitroso (alkylation)
	SN1 >> Carbenium Ion Formation >> Polycyclic (PAHs) and heterocyclic (HACs) aromatic hydrocarbons-SN1
	SN1 >> Iminium Ion Formation >> Aliphatic tertiary amines
	SN1 >> Nitrenium Ion formation >> Aromatic nitro
	SN2 >> Direct Acting Epoxides and related >> Epoxides
	SN2 >> Nitrosation-SN2 >> Nitroso-SN2
	No alerts (DNA binding OECD)
in vitro mutagenicity (Ames test) alerts by ISS	9,10-dihydrophenanthrenes
	Alkyl and aryl N-nitroso groups
	Alkyl hydroperoxides
	alpha,beta-unsaturated carbonyls
	Epoxides and aziridines
	Nitro-aromatic
	Polycyclic Aromatic Hydrocarbons
	Quinones
	Simple aldehyde
	No alerts(in vitro ISS)
in vivo mutagenicity (Micronucleus) alerts by ISS	H-acceptor-path3-H-acceptor
	Oxolane
	No alerts(in vivo ISS)

## Sheet: MechanisticDescriptors_explain
Profiler	Mechanistic Profile	Domain	Alerts
DNA alerts for AMES, MN and CA by OASIS v.1.3	AN2 >> Michael-type addition, quinoid structures >> Quinones	AN2	Quinones
	AN2 >> Schiff base formation >> Dicarbonyl compounds	AN2	Dicarbonyl compounds
	Non-covalent interaction >> DNA intercalation >> Fused-Ring Nitroaromatics	Non-covalent interaction	Fused-Ring Nitroaromatics
	Non-covalent interaction >> DNA intercalation >> Quinones	Non-covalent interaction	Quinones
	Radical >> Radical mechanism by ROS formation (indirect) or direct radical attack on DNA >> Organic Peroxy Compounds	Radical	Organic Peroxy Compounds
	Radical >> Radical mechanism via ROS formation (indirect) >> Fused-Ring Nitroaromatics	Radical	Fused-Ring Nitroaromatics
	Radical >> Radical mechanism via ROS formation (indirect) >> Quinones	Radical	Quinones
	SN1 >> Alkylation after metabolically formed carbenium ion species >> Polycyclic Aromatic Hydrocarbon Derivatives	SN1	Polycyclic Aromatic Hydrocarbon Derivatives
	SN1 >> Nucleophilic attack after reduction and nitrenium ion formation >> Fused-Ring Nitroaromatics	SN1	Fused-Ring Nitroaromatics
	SN2 >> Alkylation, direct acting epoxides and related after P450-mediated metabolic activation >> Polycyclic Aromatic Hydrocarbon Derivatives	SN2	Polycyclic Aromatic Hydrocarbon Derivatives
	No alerts (DNA alerts for AMES, MN and CA by OASIS v.1.3)
DNA binding by OASIS v.1.3	AN2 >> Michael-type addition on alpha, beta-unsaturated carbonyl compounds >> Four- and Five-Membered Lactones	AN2	Four- and Five-Membered Lactones
	AN2 >> Nucleophilic addition to alpha, beta-unsaturated carbonyl compounds >> alpha, beta-Unsaturated Aldehydes	AN2	alpha, beta-Unsaturated Aldehydes
	AN2 >> Schiff base formation >> alpha, beta-Unsaturated Aldehydes	AN2	alpha, beta-Unsaturated Aldehydes
	Radical >> Radical mechanism via ROS formation (indirect) >> Nitrophenols, Nitrophenyl Ethers and Nitrobenzoic Acids	Radical	Nitrophenols, Nitrophenyl Ethers and Nitrobenzoic Acids
	SN1 >> Nucleophilic attack after carbenium ion formation >> N-Nitroso Compounds	SN1	N-Nitroso Compounds
	SN1 >> Nucleophilic attack after carbenium ion formation >> Specific Acetate Esters	SN1	Specific Acetate Esters
	SN1 >> Nucleophilic attack after nitrenium and/or carbenium ion formation >> N-Nitroso Compounds	SN1	N-Nitroso Compounds
	SN1 >> Nucleophilic attack after reduction and nitrenium ion formation >> Nitrophenols, Nitrophenyl Ethers and Nitrobenzoic Acids	SN1	Nitrophenols, Nitrophenyl Ethers and Nitrobenzoic Acids
	SN2 >> Acylation >> Specific Acetate Esters	SN2	Specific Acetate Esters
	SN2 >> Alkylation, direct acting epoxides and related >> Epoxides and Aziridines	SN2	Epoxides and Aziridines
	SN2 >> Alkylation, ring opening SN2 reaction >> Four- and Five-Membered Lactones	SN2	Four- and Five-Membered Lactones
	SN2 >> Nucleophilic substitution at sp3 Carbon atom >> Specific Acetate Esters	SN2	Specific Acetate Esters
	No alerts(DNA binding OASIS v.1.3)
DNA binding by OECD	Michael addition >> P450 Mediated Activation to Quinones and Quinone-type Chemicals >> Alkyl phenols	Michael addition	Alkyl phenols
	Michael addition >> P450 Mediated Activation to Quinones and Quinone-type Chemicals >> Hydroquinones	Michael addition	Hydroquinones
	Michael addition >> Polarised Alkenes-Michael addition >> Alpha, beta- unsaturated ketones	Michael addition	Alpha, beta- unsaturated ketones
	Michael addition >> Quinones and Quinone-type Chemicals >> Quinones	Michael addition	Quinones
	Schiff base formers >> Direct Acting Schiff Base Formers >> Alpha-beta-dicarbonyl	Schiff base formers	Alpha-beta-dicarbonyl
	Schiff base formers >> Direct Acting Schiff Base Formers >> Mono aldehydes	Schiff base formers	Mono aldehydes
	SN1 >> Carbenium Ion Formation >> N-Nitroso (alkylation)	SN1	N-Nitroso (alkylation)
	SN1 >> Carbenium Ion Formation >> Polycyclic (PAHs) and heterocyclic (HACs) aromatic hydrocarbons-SN1	SN1	Polycyclic (PAHs) and heterocyclic (HACs) aromatic hydrocarbons-SN1
	SN1 >> Iminium Ion Formation >> Aliphatic tertiary amines	SN1	Aliphatic tertiary amines
	SN1 >> Nitrenium Ion formation >> Aromatic nitro	SN1	Aromatic nitro
	SN2 >> Direct Acting Epoxides and related >> Epoxides	SN2	Epoxides
	SN2 >> Nitrosation-SN2 >> Nitroso-SN2	SN2	Nitroso-SN2
	No alerts (DNA binding OECD)
in vitro mutagenicity (Ames test) alerts by ISS	9,10-dihydrophenanthrenes		9,10-dihydrophenanthrenes
	Alkyl and aryl N-nitroso groups		Alkyl and aryl N-nitroso groups
	Alkyl hydroperoxides		Alkyl hydroperoxides
	alpha,beta-unsaturated carbonyls		alpha,beta-unsaturated carbonyls
	Epoxides and aziridines		Epoxides and aziridines
	Nitro-aromatic		Nitro-aromatic
	Polycyclic Aromatic Hydrocarbons		Polycyclic Aromatic Hydrocarbons
	Quinones		Quinones
	Simple aldehyde		Simple aldehyde
	No alerts(in vitro ISS)
in vivo mutagenicity (Micronucleus) alerts by ISS	H-acceptor-path3-H-acceptor		H-acceptor-path3-H-acceptor
	Oxolane		Oxolane
	No alerts(in vivo ISS)
