# Supplementary material for: Evaluating the mutagenic potential of aerosol organic compounds using informatics based screening
Source: Copernicus journal article supplement (doi:10.5194/acp-2017-574), 2017-07-17
Supplement: Supplementary file 3 [file TableS6.xlsx]

## Sheet: genotox_data_13-aerosol_details
NAME	SMILES	Overall Call (CCRIS)	Test Call	Endpoint	Type of method	Test type	Test organisms (species)	Strain	Metabolic activation	Source of methabolic system	Database name	Author	Reference source	Year
alb 01	Oc1ccccc1N(=O)=O	Negative	Negative	Gene mutation	In Vitro	Bacterial reverse mutation assay (e.g. Ames test)	Salmonella typhimurium	TA 100	With S9		Bacterial mutagenicity ISSSTY	Romualdo Benigni	CCRIS database,Toxnet databases	02.5.2011
alb 01	Oc1ccccc1N(=O)=O	Negative	Negative	Gene mutation	In Vitro	Bacterial reverse mutation assay (e.g. Ames test)	Salmonella typhimurium	TA 1535	With S9		Bacterial mutagenicity ISSSTY	Romualdo Benigni	CCRIS database,Toxnet databases	02.5.2011
alb 01	Oc1ccccc1N(=O)=O	Negative	Negative	Gene mutation	In Vitro	Bacterial reverse mutation assay (e.g. Ames test)	Salmonella typhimurium	TA 1537	With S9		Bacterial mutagenicity ISSSTY	Romualdo Benigni	CCRIS database,Toxnet databases	02.5.2011
alb 01	Oc1ccccc1N(=O)=O	Negative	Negative	Gene mutation	In Vitro	Bacterial reverse mutation assay (e.g. Ames test)	Salmonella typhimurium	TA 1538	With S9		Bacterial mutagenicity ISSSTY	Romualdo Benigni	CCRIS database,Toxnet databases	02.5.2011
alb 01	Oc1ccccc1N(=O)=O	Negative	Negative	Gene mutation	In Vitro	Bacterial reverse mutation assay (e.g. Ames test)	Salmonella typhimurium	TA 98	With S9		Bacterial mutagenicity ISSSTY	Romualdo Benigni	CCRIS database,Toxnet databases	02.5.2011
alb 01	Oc1ccccc1N(=O)=O	Negative	Negative	Gene mutation	In Vitro	Bacterial reverse mutation assay (e.g. Ames test)	Salmonella typhimurium	TA 100	Without S9		Bacterial mutagenicity ISSSTY	Romualdo Benigni	CCRIS database,Toxnet databases	02.5.2011
alb 01	Oc1ccccc1N(=O)=O	Negative	Negative	Gene mutation	In Vitro	Bacterial reverse mutation assay (e.g. Ames test)	Salmonella typhimurium	TA 1535	Without S9		Bacterial mutagenicity ISSSTY	Romualdo Benigni	CCRIS database,Toxnet databases	02.5.2011
alb 01	Oc1ccccc1N(=O)=O	Negative	Negative	Gene mutation	In Vitro	Bacterial reverse mutation assay (e.g. Ames test)	Salmonella typhimurium	TA 1537	Without S9		Bacterial mutagenicity ISSSTY	Romualdo Benigni	CCRIS database,Toxnet databases	02.5.2011
alb 01	Oc1ccccc1N(=O)=O	Negative	Negative	Gene mutation	In Vitro	Bacterial reverse mutation assay (e.g. Ames test)	Salmonella typhimurium	TA 1538	Without S9		Bacterial mutagenicity ISSSTY	Romualdo Benigni	CCRIS database,Toxnet databases	02.5.2011
alb 01	Oc1ccccc1N(=O)=O	Negative	Negative	Gene mutation	In Vitro	Bacterial reverse mutation assay (e.g. Ames test)	Salmonella typhimurium	TA 98	Without S9		Bacterial mutagenicity ISSSTY	Romualdo Benigni	CCRIS database,Toxnet databases	02.5.2011
alb 01	Oc1ccccc1N(=O)=O		Negative	Gene mutation	In Vitro	Bacterial reverse mutation assay (e.g. Ames test)	Salmonella typhimurium	TA 98	With S9	rat	Genotoxicity OASIS	P&G
alb 01	Oc1ccccc1N(=O)=O		Negative	Gene mutation	In Vitro	Bacterial reverse mutation assay (e.g. Ames test)	Salmonella typhimurium	TA 100	With S9	rat	Genotoxicity OASIS	P&G
alb 01	Oc1ccccc1N(=O)=O		Negative	Gene mutation	In Vitro	Bacterial reverse mutation assay (e.g. Ames test)	Salmonella typhimurium	TA 1535	With S9	rat	Genotoxicity OASIS	P&G
alb 01	Oc1ccccc1N(=O)=O		Negative	Gene mutation	In Vitro	Bacterial reverse mutation assay (e.g. Ames test)	Salmonella typhimurium	TA 1537	With S9	rat	Genotoxicity OASIS	P&G
alb 01	Oc1ccccc1N(=O)=O		Negative	Gene mutation	In Vitro	Bacterial reverse mutation assay (e.g. Ames test)	Salmonella typhimurium	No strain info	No S9 info		Genotoxicity OASIS	Kazius J, McGuire R., Bursi R	Journal of Medicinal Chemistry 48 (1), pp. 312-32, 25
alb 01	Oc1ccccc1N(=O)=O		Negative	Gene mutation	In Vitro	Bacterial reverse mutation assay (e.g. Ames test)	Salmonella typhimurium	TA 1538	With S9	rat	Genotoxicity OASIS	P&G
alb 01	Oc1ccccc1N(=O)=O		Negative	Gene mutation	In Vitro	Bacterial reverse mutation assay (e.g. Ames test)	Salmonella typhimurium	TA 97	Without S9		Genotoxicity OASIS	P&G
alb 01	Oc1ccccc1N(=O)=O		Negative	Gene mutation	In Vitro	Bacterial reverse mutation assay (e.g. Ames test)	Salmonella typhimurium	TA 98	Without S9		Genotoxicity OASIS	P&G
alb 01	Oc1ccccc1N(=O)=O		Negative	Gene mutation	In Vitro	Bacterial reverse mutation assay (e.g. Ames test)	Salmonella typhimurium	TA 100	Without S9		Genotoxicity OASIS	P&G
alb 01	Oc1ccccc1N(=O)=O		Negative	Gene mutation	In Vitro	Bacterial reverse mutation assay (e.g. Ames test)	Salmonella typhimurium	TA 1535	Without S9		Genotoxicity OASIS	P&G
alb 01	Oc1ccccc1N(=O)=O		Negative	Gene mutation	In Vitro	Bacterial reverse mutation assay (e.g. Ames test)	Salmonella typhimurium	TA 1537	Without S9		Genotoxicity OASIS	P&G
alb 01	Oc1ccccc1N(=O)=O		Negative	Gene mutation	In Vitro	Bacterial reverse mutation assay (e.g. Ames test)	Salmonella typhimurium	TA 1538	Without S9		Genotoxicity OASIS	P&G
alb 01	Oc1ccccc1N(=O)=O		Negative	Gene mutation	In Vitro	Bacterial reverse mutation assay (e.g. Ames test)	Salmonella typhimurium	TA 97	With S9	rat	Genotoxicity OASIS	P&G
alb 02	Cc1ccccc1O	Negative	Negative	Gene mutation	In Vitro	Bacterial reverse mutation assay (e.g. Ames test)	Salmonella typhimurium	TA 100	With S9		Bacterial mutagenicity ISSSTY	Romualdo Benigni	CCRIS database,Toxnet databases	02.5.2011
alb 02	Cc1ccccc1O	Negative	Negative	Gene mutation	In Vitro	Bacterial reverse mutation assay (e.g. Ames test)	Salmonella typhimurium	TA 1535	With S9		Bacterial mutagenicity ISSSTY	Romualdo Benigni	CCRIS database,Toxnet databases	02.5.2011
alb 02	Cc1ccccc1O	Negative	Negative	Gene mutation	In Vitro	Bacterial reverse mutation assay (e.g. Ames test)	Salmonella typhimurium	TA 1537	With S9		Bacterial mutagenicity ISSSTY	Romualdo Benigni	CCRIS database,Toxnet databases	02.5.2011
alb 02	Cc1ccccc1O	Negative	Negative	Gene mutation	In Vitro	Bacterial reverse mutation assay (e.g. Ames test)	Salmonella typhimurium	TA 98	With S9		Bacterial mutagenicity ISSSTY	Romualdo Benigni	CCRIS database,Toxnet databases	02.5.2011
alb 02	Cc1ccccc1O	Negative	Negative	Gene mutation	In Vitro	Bacterial reverse mutation assay (e.g. Ames test)	Salmonella typhimurium	TA 100	Without S9		Bacterial mutagenicity ISSSTY	Romualdo Benigni	CCRIS database,Toxnet databases	02.5.2011
alb 02	Cc1ccccc1O	Negative	Negative	Gene mutation	In Vitro	Bacterial reverse mutation assay (e.g. Ames test)	Salmonella typhimurium	TA 1535	Without S9		Bacterial mutagenicity ISSSTY	Romualdo Benigni	CCRIS database,Toxnet databases	02.5.2011
alb 02	Cc1ccccc1O	Negative	Negative	Gene mutation	In Vitro	Bacterial reverse mutation assay (e.g. Ames test)	Salmonella typhimurium	TA 1537	Without S9		Bacterial mutagenicity ISSSTY	Romualdo Benigni	CCRIS database,Toxnet databases	02.5.2011
alb 02	Cc1ccccc1O	Negative	Negative	Gene mutation	In Vitro	Bacterial reverse mutation assay (e.g. Ames test)	Salmonella typhimurium	TA 98	Without S9		Bacterial mutagenicity ISSSTY	Romualdo Benigni	CCRIS database,Toxnet databases	02.5.2011
alb 02	Cc1ccccc1O		Negative	Gene mutation	In Vitro	Bacterial reverse mutation assay (e.g. Ames test)	Salmonella typhimurium	TA 98	With S9	rat	Genotoxicity OASIS	P&G
alb 02	Cc1ccccc1O		Negative	Gene mutation	In Vitro	Bacterial reverse mutation assay (e.g. Ames test)	Salmonella typhimurium	TA 100	With S9	rat	Genotoxicity OASIS	P&G
alb 02	Cc1ccccc1O		Negative	Gene mutation	In Vitro	Bacterial reverse mutation assay (e.g. Ames test)	Salmonella typhimurium	TA 1535	With S9	rat	Genotoxicity OASIS	P&G
alb 02	Cc1ccccc1O		Negative	Gene mutation	In Vitro	Bacterial reverse mutation assay (e.g. Ames test)	Salmonella typhimurium	TA 1537	With S9	rat	Genotoxicity OASIS	P&G
alb 02	Cc1ccccc1O		Negative	Gene mutation	In Vitro	Bacterial reverse mutation assay (e.g. Ames test)	Salmonella typhimurium	TA 1538	With S9	rat	Genotoxicity OASIS	P&G
alb 02	Cc1ccccc1O		Negative	Gene mutation	In Vitro	Bacterial reverse mutation assay (e.g. Ames test)	Salmonella typhimurium	TA 97	Without S9		Genotoxicity OASIS	P&G
alb 02	Cc1ccccc1O		Negative	Gene mutation	In Vitro	Bacterial reverse mutation assay (e.g. Ames test)	Salmonella typhimurium	TA 98	Without S9		Genotoxicity OASIS	P&G
alb 02	Cc1ccccc1O		Negative	Gene mutation	In Vitro	Bacterial reverse mutation assay (e.g. Ames test)	Salmonella typhimurium	TA 100	Without S9		Genotoxicity OASIS	P&G
alb 02	Cc1ccccc1O		Negative	Gene mutation	In Vitro	Bacterial reverse mutation assay (e.g. Ames test)	Salmonella typhimurium	TA 1535	Without S9		Genotoxicity OASIS	P&G
alb 02	Cc1ccccc1O		Negative	Gene mutation	In Vitro	Bacterial reverse mutation assay (e.g. Ames test)	Salmonella typhimurium	TA 1537	Without S9		Genotoxicity OASIS	P&G
alb 02	Cc1ccccc1O		Negative	Gene mutation	In Vitro	Bacterial reverse mutation assay (e.g. Ames test)	Salmonella typhimurium	TA 1538	Without S9		Genotoxicity OASIS	P&G
alb 02	Cc1ccccc1O		Negative	Gene mutation	In Vitro	Bacterial reverse mutation assay (e.g. Ames test)	Salmonella typhimurium	TA 97	With S9	rat	Genotoxicity OASIS	P&G
lmp 01	Oc1cccc2ccccc12	Positive	Positive	Gene mutation	In Vitro	Bacterial reverse mutation assay (e.g. Ames test)	Salmonella typhimurium	TA 1535	With S9		Bacterial mutagenicity ISSSTY	Romualdo Benigni	CCRIS database,Toxnet databases	02.5.2011
lmp 01	Oc1cccc2ccccc12	Positive	Positive	Gene mutation	In Vitro	Bacterial reverse mutation assay (e.g. Ames test)	Salmonella typhimurium	TA 1538	With S9		Bacterial mutagenicity ISSSTY	Romualdo Benigni	CCRIS database,Toxnet databases	02.5.2011
lmp 01	Oc1cccc2ccccc12	Positive	Negative	Gene mutation	In Vitro	Bacterial reverse mutation assay (e.g. Ames test)	Salmonella typhimurium	TA 98	With S9		Bacterial mutagenicity ISSSTY	Romualdo Benigni	CCRIS database,Toxnet databases	02.5.2011
lmp 01	Oc1cccc2ccccc12		Negative	Gene mutation	In Vitro	Bacterial reverse mutation assay (e.g. Ames test)	Salmonella typhimurium	TA 98	Without S9		Genotoxicity OASIS	U.S. Environmental Protection Agency	Mutation Research, 168 (1996) 69-240	1.1.1996 г.
lmp 01	Oc1cccc2ccccc12		Negative	Gene mutation	In Vitro	Bacterial reverse mutation assay (e.g. Ames test)	Salmonella typhimurium	TA 100	Without S9		Genotoxicity OASIS	U.S. Environmental Protection Agency	Mutation Research, 168 (1996) 69-240	1.1.1996 г.
lmp 01	Oc1cccc2ccccc12		Negative	Gene mutation	In Vitro	Bacterial reverse mutation assay (e.g. Ames test)	Salmonella typhimurium	TA 1535	Without S9		Genotoxicity OASIS	U.S. Environmental Protection Agency	Mutation Research, 168 (1996) 69-240	1.1.1996 г.
lmp 01	Oc1cccc2ccccc12		Negative	Gene mutation	In Vitro	Bacterial reverse mutation assay (e.g. Ames test)	Salmonella typhimurium	TA 1537	Without S9		Genotoxicity OASIS	U.S. Environmental Protection Agency	Mutation Research, 168 (1996) 69-240	1.1.1996 г.
lmp 01	Oc1cccc2ccccc12		Negative	Gene mutation	In Vitro	Bacterial reverse mutation assay (e.g. Ames test)	Salmonella typhimurium	TA 100	With S9	rat	Genotoxicity OASIS	U.S. Environmental Protection Agency	Mutation Research, 168 (1996) 69-240	1.1.1996 г.
lmp 01	Oc1cccc2ccccc12		Negative	Gene mutation	In Vitro	Bacterial reverse mutation assay (e.g. Ames test)	Salmonella typhimurium	TA 1535	With S9	rat	Genotoxicity OASIS	U.S. Environmental Protection Agency	Mutation Research, 168 (1996) 69-240	1.1.1996 г.
lmp 01	Oc1cccc2ccccc12		Negative	Gene mutation	In Vitro	Bacterial reverse mutation assay (e.g. Ames test)	Salmonella typhimurium	TA 1537	With S9	rat	Genotoxicity OASIS	U.S. Environmental Protection Agency	Mutation Research, 168 (1996) 69-240	1.1.1996 г.
lmp 01	Oc1cccc2ccccc12		Negative	Gene mutation	In Vitro	Bacterial reverse mutation assay (e.g. Ames test)	Salmonella typhimurium	TA 98	With S9	rat	Genotoxicity OASIS	U.S. Environmental Protection Agency	Mutation Research, 168 (1996) 69-240	1.1.1996 г.
lmp 02	O=C1C=CC(=O)c2ccccc12	Positive	Negative	Gene mutation	In Vitro	Bacterial reverse mutation assay (e.g. Ames test)	Salmonella typhimurium	TA 100	With S9		Bacterial mutagenicity ISSSTY	Romualdo Benigni	CCRIS database,Toxnet databases	02.5.2011
lmp 02	O=C1C=CC(=O)c2ccccc12	Positive	Equivocal	Gene mutation	In Vitro	Bacterial reverse mutation assay (e.g. Ames test)	Salmonella typhimurium	TA 102	With S9		Bacterial mutagenicity ISSSTY	Romualdo Benigni	CCRIS database,Toxnet databases	02.5.2011
lmp 02	O=C1C=CC(=O)c2ccccc12	Positive	Positive	Gene mutation	In Vitro	Bacterial reverse mutation assay (e.g. Ames test)	Salmonella typhimurium	TA 104	With S9		Bacterial mutagenicity ISSSTY	Romualdo Benigni	CCRIS database,Toxnet databases	02.5.2011
lmp 02	O=C1C=CC(=O)c2ccccc12	Positive	Negative	Gene mutation	In Vitro	Bacterial reverse mutation assay (e.g. Ames test)	Salmonella typhimurium	TA 1535	With S9		Bacterial mutagenicity ISSSTY	Romualdo Benigni	CCRIS database,Toxnet databases	02.5.2011
lmp 02	O=C1C=CC(=O)c2ccccc12	Positive	Negative	Gene mutation	In Vitro	Bacterial reverse mutation assay (e.g. Ames test)	Salmonella typhimurium	TA 1537	With S9		Bacterial mutagenicity ISSSTY	Romualdo Benigni	CCRIS database,Toxnet databases	02.5.2011
lmp 02	O=C1C=CC(=O)c2ccccc12	Positive	Negative	Gene mutation	In Vitro	Bacterial reverse mutation assay (e.g. Ames test)	Salmonella typhimurium	TA 1538	With S9		Bacterial mutagenicity ISSSTY	Romualdo Benigni	CCRIS database,Toxnet databases	02.5.2011
lmp 02	O=C1C=CC(=O)c2ccccc12	Positive	Negative	Gene mutation	In Vitro	Bacterial reverse mutation assay (e.g. Ames test)	Salmonella typhimurium	TA 97	With S9		Bacterial mutagenicity ISSSTY	Romualdo Benigni	CCRIS database,Toxnet databases	02.5.2011
lmp 02	O=C1C=CC(=O)c2ccccc12	Positive	Negative	Gene mutation	In Vitro	Bacterial reverse mutation assay (e.g. Ames test)	Salmonella typhimurium	TA 98	With S9		Bacterial mutagenicity ISSSTY	Romualdo Benigni	CCRIS database,Toxnet databases	02.5.2011
lmp 02	O=C1C=CC(=O)c2ccccc12	Positive	Negative	Gene mutation	In Vitro	Bacterial reverse mutation assay (e.g. Ames test)	Salmonella typhimurium	TA 100	Without S9		Bacterial mutagenicity ISSSTY	Romualdo Benigni	CCRIS database,Toxnet databases	02.5.2011
lmp 02	O=C1C=CC(=O)c2ccccc12	Positive	Negative	Gene mutation	In Vitro	Bacterial reverse mutation assay (e.g. Ames test)	Salmonella typhimurium	TA 102	Without S9		Bacterial mutagenicity ISSSTY	Romualdo Benigni	CCRIS database,Toxnet databases	02.5.2011
lmp 02	O=C1C=CC(=O)c2ccccc12	Positive	Positive	Gene mutation	In Vitro	Bacterial reverse mutation assay (e.g. Ames test)	Salmonella typhimurium	TA 104	Without S9		Bacterial mutagenicity ISSSTY	Romualdo Benigni	CCRIS database,Toxnet databases	02.5.2011
lmp 02	O=C1C=CC(=O)c2ccccc12	Positive	Negative	Gene mutation	In Vitro	Bacterial reverse mutation assay (e.g. Ames test)	Salmonella typhimurium	TA 1535	Without S9		Bacterial mutagenicity ISSSTY	Romualdo Benigni	CCRIS database,Toxnet databases	02.5.2011
lmp 02	O=C1C=CC(=O)c2ccccc12	Positive	Negative	Gene mutation	In Vitro	Bacterial reverse mutation assay (e.g. Ames test)	Salmonella typhimurium	TA 1537	Without S9		Bacterial mutagenicity ISSSTY	Romualdo Benigni	CCRIS database,Toxnet databases	02.5.2011
lmp 02	O=C1C=CC(=O)c2ccccc12	Positive	Negative	Gene mutation	In Vitro	Bacterial reverse mutation assay (e.g. Ames test)	Salmonella typhimurium	TA 1538	Without S9		Bacterial mutagenicity ISSSTY	Romualdo Benigni	CCRIS database,Toxnet databases	02.5.2011
lmp 02	O=C1C=CC(=O)c2ccccc12	Positive	Negative	Gene mutation	In Vitro	Bacterial reverse mutation assay (e.g. Ames test)	Salmonella typhimurium	TA 97	Without S9		Bacterial mutagenicity ISSSTY	Romualdo Benigni	CCRIS database,Toxnet databases	02.5.2011
lmp 02	O=C1C=CC(=O)c2ccccc12	Positive	Negative	Gene mutation	In Vitro	Bacterial reverse mutation assay (e.g. Ames test)	Salmonella typhimurium	TA 98	Without S9		Bacterial mutagenicity ISSSTY	Romualdo Benigni	CCRIS database,Toxnet databases	02.5.2011
lmp 02	O=C1C=CC(=O)c2ccccc12		Positive	Gene mutation	In Vitro	Bacterial reverse mutation assay (e.g. Ames test)	Salmonella typhimurium	No strain info	No S9 info		Genotoxicity OASIS	Kazius J, McGuire R., Bursi R	Journal of Medicinal Chemistry 48 (1), pp. 312-32, 25
lmp 07	OC(=O)c1ccccc1C(O)=O	Negative	Negative	Gene mutation	In Vitro	Bacterial reverse mutation assay (e.g. Ames test)	Salmonella typhimurium	TA 100	With S9		Bacterial mutagenicity ISSSTY	Romualdo Benigni	CCRIS database,Toxnet databases	02.5.2011
lmp 07	OC(=O)c1ccccc1C(O)=O	Negative	Negative	Gene mutation	In Vitro	Bacterial reverse mutation assay (e.g. Ames test)	Salmonella typhimurium	TA 102	With S9		Bacterial mutagenicity ISSSTY	Romualdo Benigni	CCRIS database,Toxnet databases	02.5.2011
lmp 07	OC(=O)c1ccccc1C(O)=O	Negative	Negative	Gene mutation	In Vitro	Bacterial reverse mutation assay (e.g. Ames test)	Salmonella typhimurium	TA 104	With S9		Bacterial mutagenicity ISSSTY	Romualdo Benigni	CCRIS database,Toxnet databases	02.5.2011
lmp 07	OC(=O)c1ccccc1C(O)=O	Negative	Negative	Gene mutation	In Vitro	Bacterial reverse mutation assay (e.g. Ames test)	Salmonella typhimurium	TA 1535	With S9		Bacterial mutagenicity ISSSTY	Romualdo Benigni	CCRIS database,Toxnet databases	02.5.2011
lmp 07	OC(=O)c1ccccc1C(O)=O	Negative	Negative	Gene mutation	In Vitro	Bacterial reverse mutation assay (e.g. Ames test)	Salmonella typhimurium	TA 1537	With S9		Bacterial mutagenicity ISSSTY	Romualdo Benigni	CCRIS database,Toxnet databases	02.5.2011
lmp 07	OC(=O)c1ccccc1C(O)=O	Negative	Negative	Gene mutation	In Vitro	Bacterial reverse mutation assay (e.g. Ames test)	Salmonella typhimurium	TA 97	With S9		Bacterial mutagenicity ISSSTY	Romualdo Benigni	CCRIS database,Toxnet databases	02.5.2011
lmp 07	OC(=O)c1ccccc1C(O)=O	Negative	Negative	Gene mutation	In Vitro	Bacterial reverse mutation assay (e.g. Ames test)	Salmonella typhimurium	TA 98	With S9		Bacterial mutagenicity ISSSTY	Romualdo Benigni	CCRIS database,Toxnet databases	02.5.2011
lmp 07	OC(=O)c1ccccc1C(O)=O	Negative	Negative	Gene mutation	In Vitro	Bacterial reverse mutation assay (e.g. Ames test)	Salmonella typhimurium	TA 100	Without S9		Bacterial mutagenicity ISSSTY	Romualdo Benigni	CCRIS database,Toxnet databases	02.5.2011
lmp 07	OC(=O)c1ccccc1C(O)=O	Negative	Negative	Gene mutation	In Vitro	Bacterial reverse mutation assay (e.g. Ames test)	Salmonella typhimurium	TA 102	Without S9		Bacterial mutagenicity ISSSTY	Romualdo Benigni	CCRIS database,Toxnet databases	02.5.2011
lmp 07	OC(=O)c1ccccc1C(O)=O	Negative	Negative	Gene mutation	In Vitro	Bacterial reverse mutation assay (e.g. Ames test)	Salmonella typhimurium	TA 104	Without S9		Bacterial mutagenicity ISSSTY	Romualdo Benigni	CCRIS database,Toxnet databases	02.5.2011
lmp 07	OC(=O)c1ccccc1C(O)=O	Negative	Negative	Gene mutation	In Vitro	Bacterial reverse mutation assay (e.g. Ames test)	Salmonella typhimurium	TA 1535	Without S9		Bacterial mutagenicity ISSSTY	Romualdo Benigni	CCRIS database,Toxnet databases	02.5.2011
lmp 07	OC(=O)c1ccccc1C(O)=O	Negative	Negative	Gene mutation	In Vitro	Bacterial reverse mutation assay (e.g. Ames test)	Salmonella typhimurium	TA 1537	Without S9		Bacterial mutagenicity ISSSTY	Romualdo Benigni	CCRIS database,Toxnet databases	02.5.2011
lmp 07	OC(=O)c1ccccc1C(O)=O	Negative	Negative	Gene mutation	In Vitro	Bacterial reverse mutation assay (e.g. Ames test)	Salmonella typhimurium	TA 97	Without S9		Bacterial mutagenicity ISSSTY	Romualdo Benigni	CCRIS database,Toxnet databases	02.5.2011
lmp 07	OC(=O)c1ccccc1C(O)=O	Negative	Negative	Gene mutation	In Vitro	Bacterial reverse mutation assay (e.g. Ames test)	Salmonella typhimurium	TA 98	Without S9		Bacterial mutagenicity ISSSTY	Romualdo Benigni	CCRIS database,Toxnet databases	02.5.2011
lmp 07	OC(=O)c1ccccc1C(O)=O		Negative	Gene mutation	In Vitro	Bacterial reverse mutation assay (e.g. Ames test)	Salmonella typhimurium	TA 98	With S9	rat	Genotoxicity OASIS	P&G
lmp 07	OC(=O)c1ccccc1C(O)=O		Negative	Gene mutation	In Vitro	Bacterial reverse mutation assay (e.g. Ames test)	Salmonella typhimurium	TA 100	With S9	rat	Genotoxicity OASIS	P&G
lmp 07	OC(=O)c1ccccc1C(O)=O		Negative	Gene mutation	In Vitro	Bacterial reverse mutation assay (e.g. Ames test)	Salmonella typhimurium	TA 1535	With S9	rat	Genotoxicity OASIS	P&G
lmp 07	OC(=O)c1ccccc1C(O)=O		Negative	Gene mutation	In Vitro	Bacterial reverse mutation assay (e.g. Ames test)	Salmonella typhimurium	TA 1537	With S9	rat	Genotoxicity OASIS	P&G
lmp 07	OC(=O)c1ccccc1C(O)=O		Negative	Gene mutation	In Vitro	Bacterial reverse mutation assay (e.g. Ames test)	Salmonella typhimurium	No strain info	No S9 info		Genotoxicity OASIS	Kazius J, McGuire R., Bursi R	Journal of Medicinal Chemistry 48 (1), pp. 312-32, 25
lmp 07	OC(=O)c1ccccc1C(O)=O		Negative	Gene mutation	In Vitro	Bacterial reverse mutation assay (e.g. Ames test)	Salmonella typhimurium	TA 1538	With S9	rat	Genotoxicity OASIS	P&G
lmp 07	OC(=O)c1ccccc1C(O)=O		Negative	Gene mutation	In Vitro	Bacterial reverse mutation assay (e.g. Ames test)	Salmonella typhimurium	TA 97	Without S9		Genotoxicity OASIS	P&G
lmp 07	OC(=O)c1ccccc1C(O)=O		Negative	Gene mutation	In Vitro	Bacterial reverse mutation assay (e.g. Ames test)	Salmonella typhimurium	TA 98	Without S9		Genotoxicity OASIS	P&G
lmp 07	OC(=O)c1ccccc1C(O)=O		Negative	Gene mutation	In Vitro	Bacterial reverse mutation assay (e.g. Ames test)	Salmonella typhimurium	TA 100	Without S9		Genotoxicity OASIS	P&G
lmp 07	OC(=O)c1ccccc1C(O)=O		Negative	Gene mutation	In Vitro	Bacterial reverse mutation assay (e.g. Ames test)	Salmonella typhimurium	TA 1535	Without S9		Genotoxicity OASIS	P&G
lmp 07	OC(=O)c1ccccc1C(O)=O		Negative	Gene mutation	In Vitro	Bacterial reverse mutation assay (e.g. Ames test)	Salmonella typhimurium	TA 1537	Without S9		Genotoxicity OASIS	P&G
lmp 07	OC(=O)c1ccccc1C(O)=O		Negative	Gene mutation	In Vitro	Bacterial reverse mutation assay (e.g. Ames test)	Salmonella typhimurium	TA 1538	Without S9		Genotoxicity OASIS	P&G
lmp 07	OC(=O)c1ccccc1C(O)=O		Negative	Gene mutation	In Vitro	Bacterial reverse mutation assay (e.g. Ames test)	Salmonella typhimurium	TA 97	With S9	rat	Genotoxicity OASIS	P&G
lmp 18	O=C1c2ccccc2-c2ccccc2C1=O	Inconclusive	Negative	Gene mutation	In Vitro	Bacterial reverse mutation assay (e.g. Ames test)	Salmonella typhimurium	TA 100	Without S9		Bacterial mutagenicity ISSSTY	Romualdo Benigni	CCRIS database,Toxnet databases	02.5.2011
lmp 18	O=C1c2ccccc2-c2ccccc2C1=O	Inconclusive	Negative	Gene mutation	In Vitro	Bacterial reverse mutation assay (e.g. Ames test)	Salmonella typhimurium	TA 102	Without S9		Bacterial mutagenicity ISSSTY	Romualdo Benigni	CCRIS database,Toxnet databases	02.5.2011
lmp 18	O=C1c2ccccc2-c2ccccc2C1=O	Inconclusive	Negative	Gene mutation	In Vitro	Bacterial reverse mutation assay (e.g. Ames test)	Salmonella typhimurium	TA 104	Without S9		Bacterial mutagenicity ISSSTY	Romualdo Benigni	CCRIS database,Toxnet databases	02.5.2011
lmp 18	O=C1c2ccccc2-c2ccccc2C1=O	Inconclusive	Negative	Gene mutation	In Vitro	Bacterial reverse mutation assay (e.g. Ames test)	Salmonella typhimurium	TA 97A	Without S9		Bacterial mutagenicity ISSSTY	Romualdo Benigni	CCRIS database,Toxnet databases	02.5.2011
lmp 18	O=C1c2ccccc2-c2ccccc2C1=O	Inconclusive	Negative	Gene mutation	In Vitro	Bacterial reverse mutation assay (e.g. Ames test)	Salmonella typhimurium	TA 98	Without S9		Bacterial mutagenicity ISSSTY	Romualdo Benigni	CCRIS database,Toxnet databases	02.5.2011
lmp 18	O=C1c2ccccc2-c2ccccc2C1=O		Negative	Gene mutation	In Vitro	Bacterial reverse mutation assay (e.g. Ames test)	Salmonella typhimurium	No strain info	No S9 info		Genotoxicity OASIS	Kazius J, McGuire R., Bursi R	Journal of Medicinal Chemistry 48 (1), pp. 312-32, 25
lmp 20	Oc1cc2ccccc2c2ccccc12	Positive	Positive	Gene mutation	In Vitro	Bacterial reverse mutation assay (e.g. Ames test)	Salmonella typhimurium	TA 1535	With S9		Bacterial mutagenicity ISSSTY	Romualdo Benigni	CCRIS database,Toxnet databases	02.5.2011
lmp 20	Oc1cc2ccccc2c2ccccc12	Positive	Negative	Gene mutation	In Vitro	Bacterial reverse mutation assay (e.g. Ames test)	Salmonella typhimurium	TA 98	With S9		Bacterial mutagenicity ISSSTY	Romualdo Benigni	CCRIS database,Toxnet databases	02.5.2011
lmp 20	Oc1cc2ccccc2c2ccccc12		Positive	Gene mutation	In Vitro	Bacterial reverse mutation assay (e.g. Ames test)	Salmonella typhimurium	No strain info	No S9 info		Genotoxicity OASIS	Kazius J, McGuire R., Bursi R	Journal of Medicinal Chemistry 48 (1), pp. 312-32, 25
lmp 21	O=N(=O)c1cc2ccccc2c2ccccc12		Positive	Gene mutation	In Vitro	Bacterial reverse mutation assay (e.g. Ames test)	Salmonella typhimurium	No strain info	No S9 info		Genotoxicity OASIS	Kazius J, McGuire R., Bursi R	Journal of Medicinal Chemistry 48 (1), pp. 312-32, 25
lmp 21	O=N(=O)c1cc2ccccc2c2ccccc12	Positive	Negative	Gene mutation	In Vitro	Bacterial reverse mutation assay (e.g. Ames test)	Salmonella typhimurium	TA 98	With S9		Bacterial mutagenicity ISSSTY	Romualdo Benigni	CCRIS database,Toxnet databases	02.5.2011
lmp 21	O=N(=O)c1cc2ccccc2c2ccccc12	Positive	Positive	Gene mutation	In Vitro	Bacterial reverse mutation assay (e.g. Ames test)	Salmonella typhimurium	TA 100	Without S9		Bacterial mutagenicity ISSSTY	Romualdo Benigni	CCRIS database,Toxnet databases	02.5.2011
lmp 21	O=N(=O)c1cc2ccccc2c2ccccc12	Positive	Positive	Gene mutation	In Vitro	Bacterial reverse mutation assay (e.g. Ames test)	Salmonella typhimurium	TA 7001	Without S9		Bacterial mutagenicity ISSSTY	Romualdo Benigni	CCRIS database,Toxnet databases	02.5.2011
lmp 21	O=N(=O)c1cc2ccccc2c2ccccc12	Positive	Positive	Gene mutation	In Vitro	Bacterial reverse mutation assay (e.g. Ames test)	Salmonella typhimurium	TA 7002	Without S9		Bacterial mutagenicity ISSSTY	Romualdo Benigni	CCRIS database,Toxnet databases	02.5.2011
lmp 21	O=N(=O)c1cc2ccccc2c2ccccc12	Positive	Negative	Gene mutation	In Vitro	Bacterial reverse mutation assay (e.g. Ames test)	Salmonella typhimurium	TA 7003	Without S9		Bacterial mutagenicity ISSSTY	Romualdo Benigni	CCRIS database,Toxnet databases	02.5.2011
lmp 21	O=N(=O)c1cc2ccccc2c2ccccc12	Positive	Positive	Gene mutation	In Vitro	Bacterial reverse mutation assay (e.g. Ames test)	Salmonella typhimurium	TA 7004	Without S9		Bacterial mutagenicity ISSSTY	Romualdo Benigni	CCRIS database,Toxnet databases	02.5.2011
lmp 21	O=N(=O)c1cc2ccccc2c2ccccc12	Positive	Positive	Gene mutation	In Vitro	Bacterial reverse mutation assay (e.g. Ames test)	Salmonella typhimurium	TA 7005	Without S9		Bacterial mutagenicity ISSSTY	Romualdo Benigni	CCRIS database,Toxnet databases	02.5.2011
lmp 21	O=N(=O)c1cc2ccccc2c2ccccc12	Positive	Positive	Gene mutation	In Vitro	Bacterial reverse mutation assay (e.g. Ames test)	Salmonella typhimurium	TA 7006	Without S9		Bacterial mutagenicity ISSSTY	Romualdo Benigni	CCRIS database,Toxnet databases	02.5.2011
lmp 21	O=N(=O)c1cc2ccccc2c2ccccc12	Positive	Positive	Gene mutation	In Vitro	Bacterial reverse mutation assay (e.g. Ames test)	Salmonella typhimurium	TA 98	Without S9		Bacterial mutagenicity ISSSTY	Romualdo Benigni	CCRIS database,Toxnet databases	02.5.2011
lmp 21	O=N(=O)c1cc2ccccc2c2ccccc12	Positive	Positive	Gene mutation	In Vitro	Bacterial reverse mutation assay (e.g. Ames test)	Salmonella typhimurium	TA 98(1,8-DNP6)	Without S9		Bacterial mutagenicity ISSSTY	Romualdo Benigni	CCRIS database,Toxnet databases	02.5.2011
lmp 21	O=N(=O)c1cc2ccccc2c2ccccc12	Positive	Positive	Gene mutation	In Vitro	Bacterial reverse mutation assay (e.g. Ames test)	Salmonella typhimurium	TA 98(NR)	Without S9		Bacterial mutagenicity ISSSTY	Romualdo Benigni	CCRIS database,Toxnet databases	02.5.2011
lmp 21	O=N(=O)c1cc2ccccc2c2ccccc12	Positive	Positive	Gene mutation	In Vitro	Bacterial reverse mutation assay (e.g. Ames test)	Salmonella typhimurium	YG 1021	Without S9		Bacterial mutagenicity ISSSTY	Romualdo Benigni	CCRIS database,Toxnet databases	02.5.2011
lmp 21	O=N(=O)c1cc2ccccc2c2ccccc12	Positive	Positive	Gene mutation	In Vitro	Bacterial reverse mutation assay (e.g. Ames test)	Salmonella typhimurium	YG 1024	Without S9		Bacterial mutagenicity ISSSTY	Romualdo Benigni	CCRIS database,Toxnet databases	02.5.2011
lmp 21	O=N(=O)c1cc2ccccc2c2ccccc12	Positive	Positive	Gene mutation	In Vitro	Bacterial reverse mutation assay (e.g. Ames test)	Salmonella typhimurium	YG 1026	Without S9		Bacterial mutagenicity ISSSTY	Romualdo Benigni	CCRIS database,Toxnet databases	02.5.2011
lmp 21	O=N(=O)c1cc2ccccc2c2ccccc12	Positive	Positive	Gene mutation	In Vitro	Bacterial reverse mutation assay (e.g. Ames test)	Salmonella typhimurium	YG 1029	Without S9		Bacterial mutagenicity ISSSTY	Romualdo Benigni	CCRIS database,Toxnet databases	02.5.2011
lmp 22	O=C1c2ccccc2-c2cccc(N(=O)=O)c2O1		Positive	Gene mutation	In Vitro	Bacterial reverse mutation assay (e.g. Ames test)	Salmonella typhimurium	No strain info	No S9 info		Genotoxicity OASIS	Kazius J, McGuire R., Bursi R	Journal of Medicinal Chemistry 48 (1), pp. 312-32, 25
lmp 22	O=C1c2ccccc2-c2cccc(N(=O)=O)c2O1	Positive	Positive	Gene mutation	In Vitro	Bacterial reverse mutation assay (e.g. Ames test)	Salmonella typhimurium	TA 98(NR)	With S9		Bacterial mutagenicity ISSSTY	Romualdo Benigni	CCRIS database,Toxnet databases	02.5.2011
lmp 22	O=C1c2ccccc2-c2cccc(N(=O)=O)c2O1	Positive	Positive	Gene mutation	In Vitro	Bacterial reverse mutation assay (e.g. Ames test)	Salmonella typhimurium	TA 98	With S9		Bacterial mutagenicity ISSSTY	Romualdo Benigni	CCRIS database,Toxnet databases	02.5.2011
lmp 22	O=C1c2ccccc2-c2cccc(N(=O)=O)c2O1	Positive	Positive	Gene mutation	In Vitro	Bacterial reverse mutation assay (e.g. Ames test)	Salmonella typhimurium	TA 98	Without S9		Bacterial mutagenicity ISSSTY	Romualdo Benigni	CCRIS database,Toxnet databases	02.5.2011
lmp 22	O=C1c2ccccc2-c2cccc(N(=O)=O)c2O1	Positive	Positive	Gene mutation	In Vitro	Bacterial reverse mutation assay (e.g. Ames test)	Salmonella typhimurium	TA 98(1,8-DNP6)	Without S9		Bacterial mutagenicity ISSSTY	Romualdo Benigni	CCRIS database,Toxnet databases	02.5.2011
lmp 22	O=C1c2ccccc2-c2cccc(N(=O)=O)c2O1	Positive	Equivocal	Gene mutation	In Vitro	Bacterial reverse mutation assay (e.g. Ames test)	Salmonella typhimurium	TA 98(NR)	Without S9		Bacterial mutagenicity ISSSTY	Romualdo Benigni	CCRIS database,Toxnet databases	02.5.2011
lmp 23	O=N(=O)c1ccc2ccc3cccc4ccc1c2c34		Positive	Gene mutation	In Vitro	Bacterial reverse mutation assay (e.g. Ames test)	Salmonella typhimurium	No strain info	No S9 info		Genotoxicity OASIS	Kirkland et al.	Mutation Research 584 (2005) 1-256
lmp 23	O=N(=O)c1ccc2ccc3cccc4ccc1c2c34	Positive	Equivocal	Gene mutation	In Vitro	Bacterial reverse mutation assay (e.g. Ames test)	Salmonella typhimurium	TA 100	With S9		Bacterial mutagenicity ISSSTY	Romualdo Benigni	CCRIS database,Toxnet databases	02.5.2011
lmp 23	O=N(=O)c1ccc2ccc3cccc4ccc1c2c34	Positive	Equivocal	Gene mutation	In Vitro	Bacterial reverse mutation assay (e.g. Ames test)	Salmonella typhimurium	TA 98(1,8-DNP6)	With S9		Bacterial mutagenicity ISSSTY	Romualdo Benigni	CCRIS database,Toxnet databases	02.5.2011
lmp 23	O=N(=O)c1ccc2ccc3cccc4ccc1c2c34	Positive	Equivocal	Gene mutation	In Vitro	Bacterial reverse mutation assay (e.g. Ames test)	Salmonella typhimurium	TA 98(NR)	With S9		Bacterial mutagenicity ISSSTY	Romualdo Benigni	CCRIS database,Toxnet databases	02.5.2011
lmp 23	O=N(=O)c1ccc2ccc3cccc4ccc1c2c34	Positive	Positive	Gene mutation	In Vitro	Bacterial reverse mutation assay (e.g. Ames test)	Salmonella typhimurium	TA 98	With S9		Bacterial mutagenicity ISSSTY	Romualdo Benigni	CCRIS database,Toxnet databases	02.5.2011
lmp 23	O=N(=O)c1ccc2ccc3cccc4ccc1c2c34	Positive	Positive	Gene mutation	In Vitro	Bacterial reverse mutation assay (e.g. Ames test)	Salmonella typhimurium	TA 100	Without S9		Bacterial mutagenicity ISSSTY	Romualdo Benigni	CCRIS database,Toxnet databases	02.5.2011
lmp 23	O=N(=O)c1ccc2ccc3cccc4ccc1c2c34	Positive	Negative	Gene mutation	In Vitro	Bacterial reverse mutation assay (e.g. Ames test)	Salmonella typhimurium	TA 102	Without S9		Bacterial mutagenicity ISSSTY	Romualdo Benigni	CCRIS database,Toxnet databases	02.5.2011
lmp 23	O=N(=O)c1ccc2ccc3cccc4ccc1c2c34	Positive	Negative	Gene mutation	In Vitro	Bacterial reverse mutation assay (e.g. Ames test)	Salmonella typhimurium	TA 104	Without S9		Bacterial mutagenicity ISSSTY	Romualdo Benigni	CCRIS database,Toxnet databases	02.5.2011
lmp 23	O=N(=O)c1ccc2ccc3cccc4ccc1c2c34	Positive	Negative	Gene mutation	In Vitro	Bacterial reverse mutation assay (e.g. Ames test)	Salmonella typhimurium	TA 1535	Without S9		Bacterial mutagenicity ISSSTY	Romualdo Benigni	CCRIS database,Toxnet databases	02.5.2011
lmp 23	O=N(=O)c1ccc2ccc3cccc4ccc1c2c34	Positive	Positive	Gene mutation	In Vitro	Bacterial reverse mutation assay (e.g. Ames test)	Salmonella typhimurium	TA 1537	Without S9		Bacterial mutagenicity ISSSTY	Romualdo Benigni	CCRIS database,Toxnet databases	02.5.2011
lmp 23	O=N(=O)c1ccc2ccc3cccc4ccc1c2c34	Positive	Positive	Gene mutation	In Vitro	Bacterial reverse mutation assay (e.g. Ames test)	Salmonella typhimurium	TA 1538	Without S9		Bacterial mutagenicity ISSSTY	Romualdo Benigni	CCRIS database,Toxnet databases	02.5.2011
lmp 23	O=N(=O)c1ccc2ccc3cccc4ccc1c2c34	Positive	Positive	Gene mutation	In Vitro	Bacterial reverse mutation assay (e.g. Ames test)	Salmonella typhimurium	TA 7001	Without S9		Bacterial mutagenicity ISSSTY	Romualdo Benigni	CCRIS database,Toxnet databases	02.5.2011
lmp 23	O=N(=O)c1ccc2ccc3cccc4ccc1c2c34	Positive	Positive	Gene mutation	In Vitro	Bacterial reverse mutation assay (e.g. Ames test)	Salmonella typhimurium	TA 7002	Without S9		Bacterial mutagenicity ISSSTY	Romualdo Benigni	CCRIS database,Toxnet databases	02.5.2011
lmp 23	O=N(=O)c1ccc2ccc3cccc4ccc1c2c34	Positive	Positive	Gene mutation	In Vitro	Bacterial reverse mutation assay (e.g. Ames test)	Salmonella typhimurium	TA 7003	Without S9		Bacterial mutagenicity ISSSTY	Romualdo Benigni	CCRIS database,Toxnet databases	02.5.2011
lmp 23	O=N(=O)c1ccc2ccc3cccc4ccc1c2c34	Positive	Positive	Gene mutation	In Vitro	Bacterial reverse mutation assay (e.g. Ames test)	Salmonella typhimurium	TA 7004	Without S9		Bacterial mutagenicity ISSSTY	Romualdo Benigni	CCRIS database,Toxnet databases	02.5.2011
lmp 23	O=N(=O)c1ccc2ccc3cccc4ccc1c2c34	Positive	Positive	Gene mutation	In Vitro	Bacterial reverse mutation assay (e.g. Ames test)	Salmonella typhimurium	TA 7005	Without S9		Bacterial mutagenicity ISSSTY	Romualdo Benigni	CCRIS database,Toxnet databases	02.5.2011
lmp 23	O=N(=O)c1ccc2ccc3cccc4ccc1c2c34	Positive	Positive	Gene mutation	In Vitro	Bacterial reverse mutation assay (e.g. Ames test)	Salmonella typhimurium	TA 7006	Without S9		Bacterial mutagenicity ISSSTY	Romualdo Benigni	CCRIS database,Toxnet databases	02.5.2011
lmp 23	O=N(=O)c1ccc2ccc3cccc4ccc1c2c34	Positive	Positive	Gene mutation	In Vitro	Bacterial reverse mutation assay (e.g. Ames test)	Salmonella typhimurium	TA 97	Without S9		Bacterial mutagenicity ISSSTY	Romualdo Benigni	CCRIS database,Toxnet databases	02.5.2011
lmp 23	O=N(=O)c1ccc2ccc3cccc4ccc1c2c34	Positive	Positive	Gene mutation	In Vitro	Bacterial reverse mutation assay (e.g. Ames test)	Salmonella typhimurium	TA 98	Without S9		Bacterial mutagenicity ISSSTY	Romualdo Benigni	CCRIS database,Toxnet databases	02.5.2011
lmp 23	O=N(=O)c1ccc2ccc3cccc4ccc1c2c34	Positive	Positive	Gene mutation	In Vitro	Bacterial reverse mutation assay (e.g. Ames test)	Salmonella typhimurium	TA 98(1,8-DNP6)	Without S9		Bacterial mutagenicity ISSSTY	Romualdo Benigni	CCRIS database,Toxnet databases	02.5.2011
lmp 23	O=N(=O)c1ccc2ccc3cccc4ccc1c2c34	Positive	Positive	Gene mutation	In Vitro	Bacterial reverse mutation assay (e.g. Ames test)	Salmonella typhimurium	TA 98(NR)	Without S9		Bacterial mutagenicity ISSSTY	Romualdo Benigni	CCRIS database,Toxnet databases	02.5.2011
lmp 23	O=N(=O)c1ccc2ccc3cccc4ccc1c2c34	Positive	Positive	Gene mutation	In Vitro	Bacterial reverse mutation assay (e.g. Ames test)	Salmonella typhimurium	YG 1020	Without S9		Bacterial mutagenicity ISSSTY	Romualdo Benigni	CCRIS database,Toxnet databases	02.5.2011
lmp 23	O=N(=O)c1ccc2ccc3cccc4ccc1c2c34	Positive	Positive	Gene mutation	In Vitro	Bacterial reverse mutation assay (e.g. Ames test)	Salmonella typhimurium	YG 1024	Without S9		Bacterial mutagenicity ISSSTY	Romualdo Benigni	CCRIS database,Toxnet databases	02.5.2011
lmp 23	O=N(=O)c1ccc2ccc3cccc4ccc1c2c34	Positive	Positive	Gene mutation	In Vitro	Bacterial reverse mutation assay (e.g. Ames test)	Salmonella typhimurium	YG 1025	Without S9		Bacterial mutagenicity ISSSTY	Romualdo Benigni	CCRIS database,Toxnet databases	02.5.2011
lmp 23	O=N(=O)c1ccc2ccc3cccc4ccc1c2c34	Positive	Positive	Gene mutation	In Vitro	Bacterial reverse mutation assay (e.g. Ames test)	Salmonella typhimurium	YG 1029	Without S9		Bacterial mutagenicity ISSSTY	Romualdo Benigni	CCRIS database,Toxnet databases	02.5.2011
ara 01	O=NN1CCCC1c1cccnc1		Positive	Gene mutation	In Vitro	Bacterial reverse mutation assay (e.g. Ames test)	Salmonella typhimurium	No strain info	No S9 info		Genotoxicity OASIS	Kazius J, McGuire R., Bursi R	Journal of Medicinal Chemistry 48 (1), pp. 312-32, 25
ara 01	O=NN1CCCC1c1cccnc1		Negative	Gene mutation	In Vitro	Bacterial reverse mutation assay (e.g. Ames test)	Salmonella typhimurium	TA 100	Without S9		Genotoxicity OASIS	National Cancer Institute
ara 01	O=NN1CCCC1c1cccnc1		Negative	Gene mutation	In Vitro	Bacterial reverse mutation assay (e.g. Ames test)	Salmonella typhimurium	TA 100	With S9	rat	Genotoxicity OASIS	National Cancer Institute
ara 01	O=NN1CCCC1c1cccnc1		Negative	Gene mutation	In Vitro	Bacterial reverse mutation assay (e.g. Ames test)	Salmonella typhimurium	TA 98	Without S9		Genotoxicity OASIS	National Cancer Institute
ara 01	O=NN1CCCC1c1cccnc1		Negative	Gene mutation	In Vitro	Bacterial reverse mutation assay (e.g. Ames test)	Salmonella typhimurium	TA 98	With S9	rat	Genotoxicity OASIS	National Cancer Institute
ara 01	O=NN1CCCC1c1cccnc1	Positive	Negative	Gene mutation	In Vitro	Bacterial reverse mutation assay (e.g. Ames test)	Salmonella typhimurium	TA 100	With S9		Bacterial mutagenicity ISSSTY	Romualdo Benigni	CCRIS database,Toxnet databases	02.5.2011
ara 01	O=NN1CCCC1c1cccnc1	Positive	Equivocal	Gene mutation	In Vitro	Bacterial reverse mutation assay (e.g. Ames test)	Salmonella typhimurium	TA 1535	With S9		Bacterial mutagenicity ISSSTY	Romualdo Benigni	CCRIS database,Toxnet databases	02.5.2011
ara 01	O=NN1CCCC1c1cccnc1	Positive	Negative	Gene mutation	In Vitro	Bacterial reverse mutation assay (e.g. Ames test)	Salmonella typhimurium	TA 1537	With S9		Bacterial mutagenicity ISSSTY	Romualdo Benigni	CCRIS database,Toxnet databases	02.5.2011
ara 01	O=NN1CCCC1c1cccnc1	Positive	Negative	Gene mutation	In Vitro	Bacterial reverse mutation assay (e.g. Ames test)	Salmonella typhimurium	TA 1538	With S9		Bacterial mutagenicity ISSSTY	Romualdo Benigni	CCRIS database,Toxnet databases	02.5.2011
ara 01	O=NN1CCCC1c1cccnc1	Positive	Negative	Gene mutation	In Vitro	Bacterial reverse mutation assay (e.g. Ames test)	Salmonella typhimurium	TA 7004	With S9		Bacterial mutagenicity ISSSTY	Romualdo Benigni	CCRIS database,Toxnet databases	02.5.2011
ara 01	O=NN1CCCC1c1cccnc1	Positive	Negative	Gene mutation	In Vitro	Bacterial reverse mutation assay (e.g. Ames test)	Salmonella typhimurium	TA 98	With S9		Bacterial mutagenicity ISSSTY	Romualdo Benigni	CCRIS database,Toxnet databases	02.5.2011
ara 01	O=NN1CCCC1c1cccnc1	Positive	Positive	Gene mutation	In Vitro	Bacterial reverse mutation assay (e.g. Ames test)	Salmonella typhimurium	TA 100	Without S9		Bacterial mutagenicity ISSSTY	Romualdo Benigni	CCRIS database,Toxnet databases	02.5.2011
ara 01	O=NN1CCCC1c1cccnc1	Positive	Negative	Gene mutation	In Vitro	Bacterial reverse mutation assay (e.g. Ames test)	Salmonella typhimurium	TA 1535	Without S9		Bacterial mutagenicity ISSSTY	Romualdo Benigni	CCRIS database,Toxnet databases	02.5.2011
ara 01	O=NN1CCCC1c1cccnc1	Positive	Negative	Gene mutation	In Vitro	Bacterial reverse mutation assay (e.g. Ames test)	Salmonella typhimurium	TA 1537	Without S9		Bacterial mutagenicity ISSSTY	Romualdo Benigni	CCRIS database,Toxnet databases	02.5.2011
ara 01	O=NN1CCCC1c1cccnc1	Positive	Negative	Gene mutation	In Vitro	Bacterial reverse mutation assay (e.g. Ames test)	Salmonella typhimurium	TA 1538	Without S9		Bacterial mutagenicity ISSSTY	Romualdo Benigni	CCRIS database,Toxnet databases	02.5.2011
ara 01	O=NN1CCCC1c1cccnc1	Positive	Positive	Gene mutation	In Vitro	Bacterial reverse mutation assay (e.g. Ames test)	Salmonella typhimurium	TA 7004	Without S9		Bacterial mutagenicity ISSSTY	Romualdo Benigni	CCRIS database,Toxnet databases	02.5.2011
ara 01	O=NN1CCCC1c1cccnc1	Positive	Negative	Gene mutation	In Vitro	Bacterial reverse mutation assay (e.g. Ames test)	Salmonella typhimurium	TA 98	Without S9		Bacterial mutagenicity ISSSTY	Romualdo Benigni	CCRIS database,Toxnet databases	02.5.2011
ara 01	O=NN1CCCC1c1cccnc1		Positive	Gene mutation	In Vitro	Bacterial reverse mutation assay (e.g. Ames test)	Salmonella typhimurium	No strain info	No S9 info		Genotoxicity OASIS	Hansen K. et al.	J. Chem. Inf. Model., 2009, 49 (9), pp 2077–2081	1.1.2009 г.
ara 02	CN(CCCC(=O)c1cccnc1)N=O		Positive	Gene mutation	In Vitro	Bacterial reverse mutation assay (e.g. Ames test)	Salmonella typhimurium	No strain info	No S9 info		Genotoxicity OASIS	Kazius J, McGuire R., Bursi R	Journal of Medicinal Chemistry 48 (1), pp. 312-32, 25
ara 02	CN(CCCC(=O)c1cccnc1)N=O	Positive	Equivocal	Gene mutation	In Vitro	Bacterial reverse mutation assay (e.g. Ames test)	Salmonella typhimurium	TA 100	With S9		Bacterial mutagenicity ISSSTY	Romualdo Benigni	CCRIS database,Toxnet databases	02.5.2011
ara 02	CN(CCCC(=O)c1cccnc1)N=O	Positive	Positive	Gene mutation	In Vitro	Bacterial reverse mutation assay (e.g. Ames test)	Salmonella typhimurium	TA 1535	With S9		Bacterial mutagenicity ISSSTY	Romualdo Benigni	CCRIS database,Toxnet databases	02.5.2011
ara 02	CN(CCCC(=O)c1cccnc1)N=O	Positive	Positive	Gene mutation	In Vitro	Bacterial reverse mutation assay (e.g. Ames test)	Salmonella typhimurium	TA 7004	With S9		Bacterial mutagenicity ISSSTY	Romualdo Benigni	CCRIS database,Toxnet databases	02.5.2011
ara 02	CN(CCCC(=O)c1cccnc1)N=O	Positive	Negative	Gene mutation	In Vitro	Bacterial reverse mutation assay (e.g. Ames test)	Salmonella typhimurium	TA 100	Without S9		Bacterial mutagenicity ISSSTY	Romualdo Benigni	CCRIS database,Toxnet databases	02.5.2011
ara 02	CN(CCCC(=O)c1cccnc1)N=O	Positive	Negative	Gene mutation	In Vitro	Bacterial reverse mutation assay (e.g. Ames test)	Salmonella typhimurium	TA 1535	Without S9		Bacterial mutagenicity ISSSTY	Romualdo Benigni	CCRIS database,Toxnet databases	02.5.2011
ara 02	CN(CCCC(=O)c1cccnc1)N=O	Positive	Negative	Gene mutation	In Vitro	Bacterial reverse mutation assay (e.g. Ames test)	Salmonella typhimurium	TA 7004	Without S9		Bacterial mutagenicity ISSSTY	Romualdo Benigni	CCRIS database,Toxnet databases	02.5.2011
ara 03	CN(CCCC(O)c1cccnc1)N=O	Positive	Positive	Gene mutation	In Vitro	Bacterial reverse mutation assay (e.g. Ames test)	Salmonella typhimurium	TA 1535	With S9		Bacterial mutagenicity ISSSTY	Romualdo Benigni	CCRIS database,Toxnet databases	02.5.2011

## Sheet: genotox_data_all
ID	CAS	NAME	Class SOA	Name	SMILES	Ames_test(exp)
1	N/A	iso 01	Isoprene SOA	2-methylbutane-1,2,3,4-tetrol	CC(O)(CO)C(O)CO	n/a
2	N/A	iso 02	Isoprene SOA	2,3,4-trihydroxy-3-methylbutyl hydrogen sulfate	CC(O)(CO)C(O)COS(O)(=O)=O	n/a
3	N/A	iso 03	Isoprene SOA	2,3-dihydroxy-3-methyl-4-(nitrooxy)butyl hydrogen sulfate	CC(O)(CON(=O)=O)C(O)COS(O)(=O)=O	n/a
4	N/A	iso 04	Isoprene SOA	(3E)-3-methylbut-3-ene-1,2,4-triol	CC(=CO)C(O)CO	n/a
5	N/A	iso 05	Isoprene SOA	3-methyloxolane-3,4-diol	CC1(O)COCC1O	n/a
6	N/A	iso 06	Isoprene SOA	2,3-dihydroxy-2-methylpropanoic acid	CC(O)(CO)C(O)=O	n/a
7	N/A	iso 07	Isoprene SOA	3-hydroxy-2-methyl-2-(sulfooxy)propanoic acid	CC(CO)(C(O)=O)OS(O)(=O)=O	n/a
8	N/A	iso 08	Isoprene SOA	3-hydroxy-2-methyl-1-(nitroperoxy)-1-oxopropan-2-yl nitrate	CC(CO)(C(=O)OON(=O)=O)ON(=O)=O	n/a
9	N/A	dic 01	Dicarbonyl (C2-C3) SOA	ethane-1,1,2,2-tetrol	OC(O)C(O)O	n/a
10	N/A	dic 02	Dicarbonyl (C2-C3) SOA	1-hydroxy-2-oxoethyl hydrogen sulfate	OC(C=O)OS(O)(=O)=O	n/a
11	N/A	dic 03	Dicarbonyl (C2-C3) SOA	1-hydroxy-2-oxopropyl hydrogen sulfate	CC(=O)C(O)OS(O)(=O)=O	n/a
12	N/A	dic 04	Dicarbonyl (C2-C3) SOA	hydroxypropanedioic acid	OC(C(O)=O)C(O)=O	n/a
13	N/A	dic 05	Dicarbonyl (C2-C3) SOA	2-oxobutanedioic acid	OC(=O)CC(=O)C(O)=O	n/a
14	N/A	dic 06	Dicarbonyl (C2-C3) SOA	2,3-dihydroxy-2-methylbutanedioic acid	CC(O)(C(O)C(O)=O)C(O)=O	n/a
15	N/A	dic 07	Dicarbonyl (C2-C3) SOA	2,3-dihydroxy-2,3-dimethylbutanedioic acid	CC(O)(C(O)=O)C(C)(O)C(O)=O	n/a
16	N/A	dic 08	Dicarbonyl (C2-C3) SOA	2-hydroxy-2-[(3-oxobutan-2-yl)oxy]propanoic acid	CC(C(C)=O)OC(C)(O)C(O)=O	n/a
17	N/A	dic 09	Dicarbonyl (C2-C3) SOA	2-(3-hydroxy-4-oxopentanoyl)-1,3,5-trimethyl-1H-imidazol-3-ium	CC1=CN{+}(C)=C(C(=O)CC(O)C(C)=O)N1C	n/a
18	N/A	ken 01	Alkenes ozonolysis SOA	1-[(1-{[1-(ethylperoxy)ethyl]peroxy}ethyl)peroxy]ethane-1-peroxol	CCOOC(C)OOC(C)OOC(C)OO	n/a
19	N/A	ken 02	Alkenes ozonolysis SOA	2-hydroperoxy-7-hydroxy-5,6-dioxoheptaneperoxoic acid	OCC(=O)C(=O)CCC(C(=O)OO)OO	n/a
20	N/A	ken 03	Alkenes ozonolysis SOA	7-hydroxy-5,6-dioxoheptaneperoxoic acid	OCC(=O)C(=O)CCCC(=O)OO	n/a
21	N/A	kan 01	Alkane photooxidation SOA	tetradecane-4,7-diyl dinitrate	CCCCCCCC(CCC(CCC)ON(=O)=O)ON(=O)=O	n/a
22	N/A	kan 02	Alkane photooxidation SOA	4-oxotetradecan-7-yl nitrate	CCCCCCCC(CCC(=O)CCC)ON(=O)=O	n/a
23	N/A	kan 03	Alkane photooxidation SOA		CCCCC(CCC(O)CCC(CCC)ON(=O)=O)ON(=O)=O	n/a
24	N/A	kan 04	Alkane photooxidation SOA	1-(5-butyl-2,3-dihydroxyoxolan-2-yl)hexan-3-yl nitrate	CCCCC1CC(O)C(O)(CCC(CCC)ON(=O)=O)O1	n/a
25	N/A	kan 05	Alkane photooxidation SOA	1-(5-butyl-2-hydroxy-3-oxooxolan-2-yl)hexan-3-yl nitrate	CCCCC1CC(=O)C(O)(CCC(CCC)ON(=O)=O)O1	n/a
26	N/A	kan 06	Alkane photooxidation SOA	1-(5-butyl-4,5-dihydrofuran-2-yl)hexan-3-yl nitrate	CCCCC1CC=C(CCC(CCC)ON(=O)=O)O1	n/a
27	N/A	mtr 01	Monoterpene SOA	3-hydroxy-2,6,6-trimethylbicyclo[3.1.1]heptan-2-yl nitrate	CC1(C)C2CC1CC(O)C2(C)ON(=O)=O	n/a
28	N/A	mtr 02	Monoterpene SOA	2,6,6-trimethyl-3-(nitrooxy)bicyclo[3.1.1]heptan-2-yl hydrogen sulfate	CC1(C)C2CC1CC(ON(=O)=O)C2(C)OS(O)(=O)=O	n/a
29	N/A	mtr 03	Monoterpene SOA	3-hydroperoxy-6,6-dimethylbicyclo[3.1.1]heptan-2-one	CC1(C)C2CC1CC(OO)C2=O	n/a
30	N/A	mtr 04	Monoterpene SOA	[(1R,3R)-3-acetyl-2,2-dimethylcyclobutyl]acetaldehyde	CC(=O)C1CC(CC=O)C1(C)C	n/a
31	N/A	mtr 05	Monoterpene SOA	[(1R,3R)-3-acetyl-2,2-dimethylcyclobutyl]acetic acid	CC(=O)C1CC(CC(O)=O)C1(C)C	n/a
32	N/A	mtr 06	Monoterpene SOA	[(1R,3R)-3-(hydroxyacetyl)-2,2-dimethylcyclobutyl]acetic acid	CC1(C)C(C(=O)CO)CC1CC(O)=O	n/a
33	N/A	mtr 07	Monoterpene SOA	(1R,3R)-3-(carboxymethyl)-2,2-dimethylcyclobutane-1-carboxylic acid	CC1(C)C(C(O)=O)CC1CC(O)=O	n/a
34	N/A	mtr 08	Monoterpene SOA	{(1R,3R)-2,2-dimethyl-3-[(nitroperoxy)carbonyl]cyclobutyl}acetic acid	CC1(C)C(C(=O)OON(=O)=O)CC1CC(O)=O	n/a
35	N/A	mtr 09	Monoterpene SOA	{(1R,3R)-2,2-dimethyl-3-[(sulfooxy)carbonyl]cyclobutyl}acetic acid	CC1(C)C(C(=O)OS(O)(=O)=O)CC1CC(O)=O	n/a
36	N/A	mtr 10	Monoterpene SOA	3-(2,2-dimethyl-5-oxooxolan-3-yl)propanoic acid	CC1(C)C(CCC(O)=O)CC(=O)O1	n/a
37	N/A	mtr 11	Monoterpene SOA	(2,2-dimethyl-5-oxooxolan-3-yl)acetic acid	CC1(C)C(CC(O)=O)CC(=O)O1	n/a
38	N/A	mtr 12	Monoterpene SOA	2,2-dimethyl-5-oxooxolane-3-carboxylic acid	CC1(C)C(C(O)=O)CC(=O)O1	n/a
39	N/A	mtr 13	Monoterpene SOA	3-(2-hydroxypropan-2-yl)pentanedioic acid	CC(C)(O)C(CC(O)=O)CC(O)=O	n/a
40	N/A	mtr 14	Monoterpene SOA	3-[2-(acetyloxy)propan-2-yl]pentanedioic acid	CC(=O)OC(C)(C)C(CC(O)=O)CC(O)=O	n/a
41	N/A	mtr 15	Monoterpene SOA		CC1(C)C(C(O)=O)CC1CC(=O)OC(C)(C)C(CC(O)=O)CC(O)=O	n/a
42	N/A	mtr 16	Monoterpene SOA		CC1(C)C(C(O)=O)CC1CC(=O)OC(C)(C)C(CC(O)=O)C(O)=O	n/a
43	N/A	mtr 17	Monoterpene SOA	3-methylbutane-1,2,3-tricarboxylic acid	CC(C)(C(CC(O)=O)C(O)=O)C(O)=O	n/a
44	N/A	mtr 18	Monoterpene SOA	3-hydroxy-2,2-dimethylpentanedioic acid	CC(C)(C(O)CC(O)=O)C(O)=O	n/a
45	N/A	mtr 19	Monoterpene SOA	2-hydroxy-4-(propan-2-yl)hexanedioic acid	CC(C)C(CC(O)C(O)=O)CC(O)=O	n/a
46	N/A	mtr 20	Monoterpene SOA	5-formyl-6,6-dimethyl-2,7-dioxoheptan-3-yl hydrogen sulfate	CC(=O)C(CC(C=O)C(C)(C)C=O)OS(O)(=O)=O	n/a
47	N/A	mtr 21	Monoterpene SOA	6-hydroperoxy-1-hydroxy-5-(hydroxymethyl)-6-methylheptane-2,3-dione	CC(C)(C(CC(=O)C(=O)CO)CO)OO	n/a
48	N/A	mtr 22	Monoterpene SOA	5-(2-hydroperoxypropan-2-yl)-3-hydroxy-2-methylcyclohex-2-en-1-one	CC1=C(O)CC(C(C)(C)OO)CC1=O	n/a
49	N/A	mtr 23	Monoterpene SOA		CC(=O)C(C1CC(C(=O)OO)(OO)C1(C)C)OO	n/a
50	N/A	mtr 24	Monoterpene SOA		CC(=O)C(=O)C1CC(C(=O)OO)(OO)C1(C)C	n/a
51	N/A	mtr 25	Monoterpene SOA		CC1(C)C(CC=O)CC1C1OCOO1	n/a
52	N/A	mtr 26	Monoterpene SOA		CC1(C)C(CC=O)CC1C1OC(C)(C2CC(CC(O)=O)C2(C)C)OO1	n/a
53	N/A	mtr 27	Monoterpene SOA		CC1(C)C2CCC3(C1C2)OC(CC1CC(C(O)=O)C1(C)C)OO3	n/a
54	N/A	mtr 28	Monoterpene SOA	3-(3-methyl-1,2,4-trioxolan-3-yl)-6-oxoheptanoic acid	CC(=O)CCC(CC(O)=O)C1(C)OCOO1	n/a
55	N/A	mtr 29	Monoterpene SOA	3-acetyl-6-oxoheptanoic acid	CC(=O)CCC(CC(O)=O)C(C)=O	n/a
56	N/A	mtr 30	Monoterpene SOA	3-acetylhexanedioic acid	CC(=O)C(CCC(O)=O)CC(O)=O	n/a
57	N/A	mtr 31	Monoterpene SOA	[2,2-dimethyl-3-(2-oxopropyl)cyclopropyl]acetic acid	CC(=O)CC1C(CC(O)=O)C1(C)C	n/a
58	N/A	str 01	Sesquiterpene SOA	4-[2-(2-carboxyethyl)-3,3-dimethylcyclobutyl]-4-oxobutanoic acid	CC1(C)CC(C(=O)CCC(O)=O)C1CCC(O)=O	n/a
59	N/A	alb 01	Alkylbenzene SOA	2-nitrophenol	Oc1ccccc1N(=O)=O	Negative
60	N/A	alb 02	Alkylbenzene SOA	2-methylphenol	Cc1ccccc1O	Negative
61	N/A	alb 03	Alkylbenzene SOA	3,5-dimethylbenzene-1,2-diol	Cc1cc(C)cc(O)c1O	n/a
62	N/A	alb 04	Alkylbenzene SOA	3,5-dimethylbenzoic acid	Cc1cc(C)cc(C(O)=O)c1	n/a
63	N/A	alb 05	Alkylbenzene SOA	2-hydroxy-1-methyl-7-oxabicyclo[4.1.0]hept-4-en-3-one	CC12C(C=CC(=O)C1O)O2	n/a
64	N/A	alb 06	Alkylbenzene SOA	2-hydroperoxy-1,5-dimethyl-6,7-dioxabicyclo[3.2.1]oct-3-ene-2,8-diol	CC12C=CC(O)(OO)C(C)(C1O)OO2	n/a
65	N/A	alb 07	Alkylbenzene SOA	8-hydroxy-1,3,5-trimethyl-6,7-dioxabicyclo[3.2.1]oct-3-en-2-yl nitrate	CC1=CC2(C)C(O)C(C)(C1ON(=O)=O)OO2	n/a
66	N/A	alb 08	Alkylbenzene SOA	4-hydroperoxy-1,3,5-trimethyl-6,7-dioxabicyclo[3.2.1]oct-2-en-8-ol	CC1=CC2(C)C(O)C(C)(C1OO)OO2	n/a
67	N/A	alb 09	Alkylbenzene SOA	8-hydroxy-1,3,5-trimethyl-6,7-dioxabicyclo[3.2.1]oct-3-en-2-one	CC1=CC2(C)C(O)C(C)(C1=O)OO2	n/a
68	N/A	alb 10	Alkylbenzene SOA	3-hydroperoxy-4-hydroxy-3,5-dimethyloxolan-2-one	CC1C(O)C(C)(OO)C(=O)O1	n/a
69	N/A	alb 11	Alkylbenzene SOA	4-hydroperoxy-2,4-dimethyl-5-oxooxolan-3-yl nitrate	CC1C(ON(=O)=O)C(C)(OO)C(=O)O1	n/a
70	N/A	alb 12	Alkylbenzene SOA	3-(2-hydroperoxy-1-hydroxy-3-oxobutyl)-2-methyloxirane-2-carbaldehyde	CC(=O)C(C(O)C1C(C)(C=O)O1)OO	n/a
71	N/A	alb 13	Alkylbenzene SOA	3-(1-hydroxy-2,3-dioxobutyl)-2-methyloxirane-2-carbaldehyde	CC(=O)C(=O)C(O)C1C(C)(C=O)O1	n/a
72	N/A	alb 14	Alkylbenzene SOA	2-methyl-3-[(2E)-4-oxopent-2-en-2-yl]oxirane-2-carbaldehyde	CC(=CC(C)=O)C1C(C)(C=O)O1	n/a
73	N/A	alb 15	Alkylbenzene SOA	(4E)-2,3-dihydroxy-2,4-dimethyl-6-oxohept-4-enoic acid	CC(=CC(C)=O)C(O)C(C)(O)C(O)=O	n/a
74	N/A	alb 16	Alkylbenzene SOA	2,3,4-trihydroxy-2,4-dimethyl-5,6-dioxoheptanoic acid	CC(=O)C(=O)C(C)(O)C(O)C(C)(O)C(O)=O	n/a
75	N/A	alb 17	Alkylbenzene SOA	2-hydroxy-2,4-dimethyl-3-oxopentanedioic acid	CC(C(=O)C(C)(O)C(O)=O)C(O)=O	n/a
76	N/A	alb 18	Alkylbenzene SOA	(2Z)-2-methylbut-2-enedioic acid	CC(=CC(O)=O)C(O)=O	n/a
77	N/A	lmp 01	low MW PAH SOA	naphthalen-1-ol	Oc1cccc2ccccc12	Positive
78	N/A	lmp 02	low MW PAH SOA	naphthalene-1,4-dione	O=C1C=CC(=O)c2ccccc12	Positive
79	N/A	lmp 03	low MW PAH SOA	2-[(1Z)-3-oxoprop-1-en-1-yl]benzaldehyde	O=CC=Cc1ccccc1C=O	n/a
80	N/A	lmp 04	low MW PAH SOA	(2E)-3-(2-formylphenyl)prop-2-enoic acid	OC(=O)C=Cc1ccccc1C=O	n/a
81	N/A	lmp 05	low MW PAH SOA	2-[(E)-2-carboxyethenyl]benzoic acid	OC(=O)C=Cc1ccccc1C(O)=O	n/a
82	N/A	lmp 06	low MW PAH SOA	(2E)-3-(2,5-dihydroxyphenyl)prop-2-enoic acid	Oc1ccc(O)cc1C=CC(O)=O	n/a
83	N/A	lmp 07	low MW PAH SOA	benzene-1,2-dicarboxylic acid	OC(=O)c1ccccc1C(O)=O	Negative
84	N/A	lmp 08	low MW PAH SOA	3,6-dihydroxybenzene-1,2-dicarboxylic acid	Oc1ccc(O)c(C(O)=O)c1C(O)=O	n/a
85	N/A	lmp 09	low MW PAH SOA	6,7-dihydroxynaphthalene-1,4-dione	Oc1cc2c(cc1O)C(=O)C=CC2=O	n/a
86	N/A	lmp 10	low MW PAH SOA	4-nitronaphthalen-1-ol	Oc1ccc(N(=O)=O)c2ccccc12	n/a
87	N/A	lmp 11	low MW PAH SOA	4-nitronaphthalene-1,8-diol	Oc1cccc2c1c(O)ccc2N(=O)=O	n/a
88	N/A	lmp 12	low MW PAH SOA	1-hydroxy-1,2-dihydronaphthalen-2-yl nitrate	OC1C(ON(=O)=O)C=Cc2ccccc12	n/a
89	N/A	lmp 13	low MW PAH SOA	6H-dibenzo[b,d]pyran-6-one	O=C1c2ccccc2-c2ccccc2O1	n/a
90	N/A	lmp 14	low MW PAH SOA	naphtho[1,2-c]furan-1,3-dione	O=C1c2ccc3ccccc3c2C(=O)O1	n/a
91	N/A	lmp 15	low MW PAH SOA	2-[(1Z)-3-oxoprop-1-en-1-yl]naphthalene-1-carbaldehyde	O=CC=Cc1ccc2ccccc2c1C=O	n/a
92	N/A	lmp 16	low MW PAH SOA	1-[(1Z)-3-oxoprop-1-en-1-yl]naphthalene-2-carbaldehyde	O=CC=Cc1c2ccccc2ccc1C=O	n/a
93	N/A	lmp 17	low MW PAH SOA	phenanthrene-1,4-dione	O=C1C=CC(=O)c2ccc3ccccc3c12	n/a
94	N/A	lmp 18	low MW PAH SOA	phenanthrene-9,10-dione	O=C1c2ccccc2-c2ccccc2C1=O	Inconclusive
95	N/A	lmp 19	low MW PAH SOA	[1,1'-biphenyl]-2,2'-dicarbaldehyde	O=Cc1ccccc1-c1ccccc1C=O	n/a
96	N/A	lmp 20	low MW PAH SOA	phenanthren-9-ol	Oc1cc2ccccc2c2ccccc12	Positive
97	N/A	lmp 21	low MW PAH SOA	9-nitrophenanthrene	O=N(=O)c1cc2ccccc2c2ccccc12	Positive
98	N/A	lmp 22	low MW PAH SOA	4-nitro-6H-dibenzo[b,d]pyran-6-one	O=C1c2ccccc2-c2cccc(N(=O)=O)c2O1	Positive
99	N/A	lmp 23	low MW PAH SOA		O=N(=O)c1ccc2ccc3cccc4ccc1c2c34	Positive
100	N/A	ara 01	Aromatic amine SOA	3-[(2S)-1-nitrosopyrrolidin-2-yl]pyridine	O=NN1CCCC1c1cccnc1	Positive
101	N/A	ara 02	Aromatic amine SOA	N-methyl-N-[4-oxo-4-(pyridin-3-yl)butyl]nitrous amide	CN(CCCC(=O)c1cccnc1)N=O	Positive
102	N/A	ara 03	Aromatic amine SOA	N-[4-hydroxy-4-(pyridin-3-yl)butyl]-N-methylnitrous amide	CN(CCCC(O)c1cccnc1)N=O	Positive
103	N/A	ara 04	Aromatic amine SOA	3-(1-nitrosopiperidin-2-yl)pyridine	O=NN1CCCCC1c1cccnc1	n/a
104	N/A	ara 05	Aromatic amine SOA	1-nitroso-1,2,3,6-tetrahydro-2,3'-bipyridine	O=NN1CC=CCC1c1cccnc1	n/a
