# Supplementary material for: Evaluating the mutagenic potential of aerosol organic compounds using informatics based screening
Source: Copernicus journal article supplement (doi:10.5194/acp-2017-574), 2017-07-17
Supplement: Supplementary file 4 [file TableS7.xlsx]

## Sheet: Ames_predictions
ID	Name	SMILES	class SOA	Name	Ames_test(pred)	Pred_Reliability	Ames_test(exp)
1	iso_01	CC(O)(CO)C(O)CO	Isoprene SOA	2-methylbutane-1,2,3,4-tetrol	Negative	High
2	iso_02	CC(O)(CO)C(O)COS(O)(=O)=O	Isoprene SOA	2,3,4-trihydroxy-3-methylbutyl hydrogen sulfate	Negative	Moderate
3	iso_03	CC(O)(CON(=O)=O)C(O)COS(O)(=O)=O	Isoprene SOA	2,3-dihydroxy-3-methyl-4-(nitrooxy)butyl hydrogen sulfate	Indeterminate	na
4	iso_04	CC(=CO)C(O)CO	Isoprene SOA	(3E)-3-methylbut-3-ene-1,2,4-triol	Negative	Moderate
5	iso_05	CC1(O)COCC1O	Isoprene SOA	3-methyloxolane-3,4-diol	Indeterminate	na
6	iso_06	CC(O)(CO)C(O)=O	Isoprene SOA	2,3-dihydroxy-2-methylpropanoic acid	Negative	High
7	iso_07	CC(CO)(C(O)=O)OS(O)(=O)=O	Isoprene SOA	3-hydroxy-2-methyl-2-(sulfooxy)propanoic acid	Negative	Moderate
8	iso_08	CC(CO)(C(=O)OON(=O)=O)ON(=O)=O	Isoprene SOA	3-hydroxy-2-methyl-1-(nitroperoxy)-1-oxopropan-2-yl nitrate	Indeterminate	na
9	dic_01	OC(O)C(O)O	Dicarbonyl (C2-C3) SOA	ethane-1,1,2,2-tetrol	Positive	Borderline
10	dic_02	OC(C=O)OS(O)(=O)=O	Dicarbonyl (C2-C3) SOA	1-hydroxy-2-oxoethyl hydrogen sulfate	Indeterminate	na
11	dic_03	CC(=O)C(O)OS(O)(=O)=O	Dicarbonyl (C2-C3) SOA	1-hydroxy-2-oxopropyl hydrogen sulfate	Indeterminate	na
12	dic_04	OC(C(O)=O)C(O)=O	Dicarbonyl (C2-C3) SOA	hydroxypropanedioic acid	Negative	High
13	dic_05	OC(=O)CC(=O)C(O)=O	Dicarbonyl (C2-C3) SOA	2-oxobutanedioic acid	Negative	High
14	dic_06	CC(O)(C(O)C(O)=O)C(O)=O	Dicarbonyl (C2-C3) SOA	2,3-dihydroxy-2-methylbutanedioic acid	Negative	High
15	dic_07	CC(O)(C(O)=O)C(C)(O)C(O)=O	Dicarbonyl (C2-C3) SOA	2,3-dihydroxy-2,3-dimethylbutanedioic acid	Negative	High
16	dic_08	CC(C(C)=O)OC(C)(O)C(O)=O	Dicarbonyl (C2-C3) SOA	2-hydroxy-2-[(3-oxobutan-2-yl)oxy]propanoic acid	Negative	Moderate
17	dic_09	CC1=CN{+}(C)=C(C(=O)CC(O)C(C)=O)N1C	Dicarbonyl (C2-C3) SOA	2-(3-hydroxy-4-oxopentanoyl)-1,3,5-trimethyl-1H-imidazol-3-ium	Indeterminate	na
18	ken_01	CCOOC(C)OOC(C)OOC(C)OO	Alkenes ozonolysis SOA	1-[(1-{[1-(ethylperoxy)ethyl]peroxy}ethyl)peroxy]ethane-1-peroxol	Positive	Moderate
19	ken_02	OCC(=O)C(=O)CCC(C(=O)OO)OO	Alkenes ozonolysis SOA	2-hydroperoxy-7-hydroxy-5,6-dioxoheptaneperoxoic acid	Indeterminate	na
20	ken_03	OCC(=O)C(=O)CCCC(=O)OO	Alkenes ozonolysis SOA	7-hydroxy-5,6-dioxoheptaneperoxoic acid	Indeterminate	na
21	kan_01	CCCCCCCC(CCC(CCC)ON(=O)=O)ON(=O)=O	Alkane photooxidation SOA	tetradecane-4,7-diyl dinitrate	Negative	Moderate
22	kan_02	CCCCCCCC(CCC(=O)CCC)ON(=O)=O	Alkane photooxidation SOA	4-oxotetradecan-7-yl nitrate	Negative	High
23	kan_03	CCCCC(CCC(O)CCC(CCC)ON(=O)=O)ON(=O)=O	Alkane photooxidation SOA		Negative	Moderate
24	kan_04	CCCCC1CC(O)C(O)(CCC(CCC)ON(=O)=O)O1	Alkane photooxidation SOA	1-(5-butyl-2,3-dihydroxyoxolan-2-yl)hexan-3-yl nitrate	Negative	Moderate
25	kan_05	CCCCC1CC(=O)C(O)(CCC(CCC)ON(=O)=O)O1	Alkane photooxidation SOA	1-(5-butyl-2-hydroxy-3-oxooxolan-2-yl)hexan-3-yl nitrate	Negative	Moderate
26	kan_06	CCCCC1CC=C(CCC(CCC)ON(=O)=O)O1	Alkane photooxidation SOA	1-(5-butyl-4,5-dihydrofuran-2-yl)hexan-3-yl nitrate	Negative	High
27	mtr_01	CC1(C)C2CC1CC(O)C2(C)ON(=O)=O	Monoterpene SOA	3-hydroxy-2,6,6-trimethylbicyclo[3.1.1]heptan-2-yl nitrate	Indeterminate	na
28	mtr_02	CC1(C)C2CC1CC(ON(=O)=O)C2(C)OS(O)(=O)=O	Monoterpene SOA	2,6,6-trimethyl-3-(nitrooxy)bicyclo[3.1.1]heptan-2-yl hydrogen sulfate	Negative	Moderate
29	mtr_03	CC1(C)C2CC1CC(OO)C2=O	Monoterpene SOA	3-hydroperoxy-6,6-dimethylbicyclo[3.1.1]heptan-2-one	Indeterminate	na
30	mtr_04	CC(=O)C1CC(CC=O)C1(C)C	Monoterpene SOA	[(1R,3R)-3-acetyl-2,2-dimethylcyclobutyl]acetaldehyde	Negative	Moderate
31	mtr_05	CC(=O)C1CC(CC(O)=O)C1(C)C	Monoterpene SOA	[(1R,3R)-3-acetyl-2,2-dimethylcyclobutyl]acetic acid	Negative	High
32	mtr_06	CC1(C)C(C(=O)CO)CC1CC(O)=O	Monoterpene SOA	[(1R,3R)-3-(hydroxyacetyl)-2,2-dimethylcyclobutyl]acetic acid	Negative	High
33	mtr_07	CC1(C)C(C(O)=O)CC1CC(O)=O	Monoterpene SOA	(1R,3R)-3-(carboxymethyl)-2,2-dimethylcyclobutane-1-carboxylic acid	Negative	High
34	mtr_08	CC1(C)C(C(=O)OON(=O)=O)CC1CC(O)=O	Monoterpene SOA	{(1R,3R)-2,2-dimethyl-3-[(nitroperoxy)carbonyl]cyclobutyl}acetic acid	Indeterminate	na
35	mtr_09	CC1(C)C(C(=O)OS(O)(=O)=O)CC1CC(O)=O	Monoterpene SOA	{(1R,3R)-2,2-dimethyl-3-[(sulfooxy)carbonyl]cyclobutyl}acetic acid	Negative	Borderline
36	mtr_10	CC1(C)C(CCC(O)=O)CC(=O)O1	Monoterpene SOA	3-(2,2-dimethyl-5-oxooxolan-3-yl)propanoic acid	Negative	Moderate
37	mtr_11	CC1(C)C(CC(O)=O)CC(=O)O1	Monoterpene SOA	(2,2-dimethyl-5-oxooxolan-3-yl)acetic acid	Positive	High
38	mtr_12	CC1(C)C(C(O)=O)CC(=O)O1	Monoterpene SOA	2,2-dimethyl-5-oxooxolane-3-carboxylic acid	Positive	Moderate
39	mtr_13	CC(C)(O)C(CC(O)=O)CC(O)=O	Monoterpene SOA	3-(2-hydroxypropan-2-yl)pentanedioic acid	Negative	High
40	mtr_14	CC(=O)OC(C)(C)C(CC(O)=O)CC(O)=O	Monoterpene SOA	3-[2-(acetyloxy)propan-2-yl]pentanedioic acid	Negative	Moderate
41	mtr_15	CC1(C)C(C(O)=O)CC1CC(=O)OC(C)(C)C(CC(O)=O)CC(O)=O	Monoterpene SOA		Negative	Moderate
42	mtr_16	CC1(C)C(C(O)=O)CC1CC(=O)OC(C)(C)C(CC(O)=O)C(O)=O	Monoterpene SOA		Negative	Moderate
43	mtr_17	CC(C)(C(CC(O)=O)C(O)=O)C(O)=O	Monoterpene SOA	3-methylbutane-1,2,3-tricarboxylic acid	Negative	High
44	mtr_18	CC(C)(C(O)CC(O)=O)C(O)=O	Monoterpene SOA	3-hydroxy-2,2-dimethylpentanedioic acid	Negative	High
45	mtr_19	CC(C)C(CC(O)C(O)=O)CC(O)=O	Monoterpene SOA	2-hydroxy-4-(propan-2-yl)hexanedioic acid	Negative	High
46	mtr_20	CC(=O)C(CC(C=O)C(C)(C)C=O)OS(O)(=O)=O	Monoterpene SOA	5-formyl-6,6-dimethyl-2,7-dioxoheptan-3-yl hydrogen sulfate	Negative	Borderline
47	mtr_21	CC(C)(C(CC(=O)C(=O)CO)CO)OO	Monoterpene SOA	6-hydroperoxy-1-hydroxy-5-(hydroxymethyl)-6-methylheptane-2,3-dione	Negative	Moderate
48	mtr_22	CC1=C(O)CC(C(C)(C)OO)CC1=O	Monoterpene SOA	5-(2-hydroperoxypropan-2-yl)-3-hydroxy-2-methylcyclohex-2-en-1-one	Indeterminate	na
49	mtr_23	CC(=O)C(C1CC(C(=O)OO)(OO)C1(C)C)OO	Monoterpene SOA		Negative	Moderate
50	mtr_24	CC(=O)C(=O)C1CC(C(=O)OO)(OO)C1(C)C	Monoterpene SOA		Positive	Moderate
51	mtr_25	CC1(C)C(CC=O)CC1C1OCOO1	Monoterpene SOA		Positive	Moderate
52	mtr_26	CC1(C)C(CC=O)CC1C1OC(C)(C2CC(CC(O)=O)C2(C)C)OO1	Monoterpene SOA		Negative	Moderate
53	mtr_27	CC1(C)C2CCC3(C1C2)OC(CC1CC(C(O)=O)C1(C)C)OO3	Monoterpene SOA		Negative	High
54	mtr_28	CC(=O)CCC(CC(O)=O)C1(C)OCOO1	Monoterpene SOA	3-(3-methyl-1,2,4-trioxolan-3-yl)-6-oxoheptanoic acid	Positive	Moderate
55	mtr_29	CC(=O)CCC(CC(O)=O)C(C)=O	Monoterpene SOA	3-acetyl-6-oxoheptanoic acid	Negative	High
56	mtr_30	CC(=O)C(CCC(O)=O)CC(O)=O	Monoterpene SOA	3-acetylhexanedioic acid	Negative	High
57	mtr_31	CC(=O)CC1C(CC(O)=O)C1(C)C	Monoterpene SOA	[2,2-dimethyl-3-(2-oxopropyl)cyclopropyl]acetic acid	Negative	High
58	str_01	CC1(C)CC(C(=O)CCC(O)=O)C1CCC(O)=O	Sesquiterpene SOA	4-[2-(2-carboxyethyl)-3,3-dimethylcyclobutyl]-4-oxobutanoic acid	Negative	High
59	alb_01	Oc1ccccc1N(=O)=O	Alkylbenzene SOA	2-nitrophenol	Negative	High	Negative
60	alb_02	Cc1ccccc1O	Alkylbenzene SOA	2-methylphenol	Negative	High	Negative
61	alb_03	Cc1cc(C)cc(O)c1O	Alkylbenzene SOA	3,5-dimethylbenzene-1,2-diol	Negative	Moderate
62	alb_04	Cc1cc(C)cc(C(O)=O)c1	Alkylbenzene SOA	3,5-dimethylbenzoic acid	Negative	High
63	alb_05	CC12C(C=CC(=O)C1O)O2	Alkylbenzene SOA	2-hydroxy-1-methyl-7-oxabicyclo[4.1.0]hept-4-en-3-one	Positive	Moderate
64	alb_06	CC12C=CC(O)(OO)C(C)(C1O)OO2	Alkylbenzene SOA	2-hydroperoxy-1,5-dimethyl-6,7-dioxabicyclo[3.2.1]oct-3-ene-2,8-diol	Positive	Moderate
65	alb_07	CC1=CC2(C)C(O)C(C)(C1ON(=O)=O)OO2	Alkylbenzene SOA	8-hydroxy-1,3,5-trimethyl-6,7-dioxabicyclo[3.2.1]oct-3-en-2-yl nitrate	Positive	Moderate
66	alb_08	CC1=CC2(C)C(O)C(C)(C1OO)OO2	Alkylbenzene SOA	4-hydroperoxy-1,3,5-trimethyl-6,7-dioxabicyclo[3.2.1]oct-2-en-8-ol	Positive	Moderate
67	alb_09	CC1=CC2(C)C(O)C(C)(C1=O)OO2	Alkylbenzene SOA	8-hydroxy-1,3,5-trimethyl-6,7-dioxabicyclo[3.2.1]oct-3-en-2-one	Positive	Moderate
68	alb_10	CC1C(O)C(C)(OO)C(=O)O1	Alkylbenzene SOA	3-hydroperoxy-4-hydroxy-3,5-dimethyloxolan-2-one	Positive	High
69	alb_11	CC1C(ON(=O)=O)C(C)(OO)C(=O)O1	Alkylbenzene SOA	4-hydroperoxy-2,4-dimethyl-5-oxooxolan-3-yl nitrate	Indeterminate	na
70	alb_12	CC(=O)C(C(O)C1C(C)(C=O)O1)OO	Alkylbenzene SOA	3-(2-hydroperoxy-1-hydroxy-3-oxobutyl)-2-methyloxirane-2-carbaldehyde	Positive	High
71	alb_13	CC(=O)C(=O)C(O)C1C(C)(C=O)O1	Alkylbenzene SOA	3-(1-hydroxy-2,3-dioxobutyl)-2-methyloxirane-2-carbaldehyde	Positive	High
72	alb_14	CC(=CC(C)=O)C1C(C)(C=O)O1	Alkylbenzene SOA	2-methyl-3-[(2E)-4-oxopent-2-en-2-yl]oxirane-2-carbaldehyde	Positive	Moderate
73	alb_15	CC(=CC(C)=O)C(O)C(C)(O)C(O)=O	Alkylbenzene SOA	(4E)-2,3-dihydroxy-2,4-dimethyl-6-oxohept-4-enoic acid	Negative	High
74	alb_16	CC(=O)C(=O)C(C)(O)C(O)C(C)(O)C(O)=O	Alkylbenzene SOA	2,3,4-trihydroxy-2,4-dimethyl-5,6-dioxoheptanoic acid	Negative	High
75	alb_17	CC(C(=O)C(C)(O)C(O)=O)C(O)=O	Alkylbenzene SOA	2-hydroxy-2,4-dimethyl-3-oxopentanedioic acid	Negative	High
76	alb_18	CC(=CC(O)=O)C(O)=O	Alkylbenzene SOA	(2Z)-2-methylbut-2-enedioic acid	Negative	High
77	lmp_01	Oc1cccc2ccccc12	low MW PAH SOA	naphthalen-1-ol	Positive	High	Positive*
78	lmp_02	O=C1C=CC(=O)c2ccccc12	low MW PAH SOA	naphthalene-1,4-dione	Positive	High	Positive*
79	lmp_03	O=CC=Cc1ccccc1C=O	low MW PAH SOA	2-[(1Z)-3-oxoprop-1-en-1-yl]benzaldehyde	Indeterminate	na
80	lmp_04	OC(=O)C=Cc1ccccc1C=O	low MW PAH SOA	(2E)-3-(2-formylphenyl)prop-2-enoic acid	Negative	Moderate
81	lmp_05	OC(=O)C=Cc1ccccc1C(O)=O	low MW PAH SOA	2-[(E)-2-carboxyethenyl]benzoic acid	Negative	High
82	lmp_06	Oc1ccc(O)cc1C=CC(O)=O	low MW PAH SOA	(2E)-3-(2,5-dihydroxyphenyl)prop-2-enoic acid	Negative	High
83	lmp_07	OC(=O)c1ccccc1C(O)=O	low MW PAH SOA	benzene-1,2-dicarboxylic acid	Negative	High	Negative
84	lmp_08	Oc1ccc(O)c(C(O)=O)c1C(O)=O	low MW PAH SOA	3,6-dihydroxybenzene-1,2-dicarboxylic acid	Negative	High
85	lmp_09	Oc1cc2c(cc1O)C(=O)C=CC2=O	low MW PAH SOA	6,7-dihydroxynaphthalene-1,4-dione	Positive	High
86	lmp_10	Oc1ccc(N(=O)=O)c2ccccc12	low MW PAH SOA	4-nitronaphthalen-1-ol	Positive	High
87	lmp_11	Oc1cccc2c1c(O)ccc2N(=O)=O	low MW PAH SOA	4-nitronaphthalene-1,8-diol	Positive	High
88	lmp_12	OC1C(ON(=O)=O)C=Cc2ccccc12	low MW PAH SOA	1-hydroxy-1,2-dihydronaphthalen-2-yl nitrate	Positive	High
89	lmp_13	O=C1c2ccccc2-c2ccccc2O1	low MW PAH SOA	6H-dibenzo[b,d]pyran-6-one	Indeterminate	na
90	lmp_14	O=C1c2ccc3ccccc3c2C(=O)O1	low MW PAH SOA	naphtho[1,2-c]furan-1,3-dione	Indeterminate	na
91	lmp_15	O=CC=Cc1ccc2ccccc2c1C=O	low MW PAH SOA	2-[(1Z)-3-oxoprop-1-en-1-yl]naphthalene-1-carbaldehyde	Indeterminate	na
92	lmp_16	O=CC=Cc1c2ccccc2ccc1C=O	low MW PAH SOA	1-[(1Z)-3-oxoprop-1-en-1-yl]naphthalene-2-carbaldehyde	Indeterminate	na
93	lmp_17	O=C1C=CC(=O)c2ccc3ccccc3c12	low MW PAH SOA	phenanthrene-1,4-dione	Positive	Borderline
94	lmp_18	O=C1c2ccccc2-c2ccccc2C1=O	low MW PAH SOA	phenanthrene-9,10-dione	Negative	Moderate	Inconclusive
95	lmp_19	O=Cc1ccccc1-c1ccccc1C=O	low MW PAH SOA	[1,1'-biphenyl]-2,2'-dicarbaldehyde	Indeterminate	na
96	lmp_20	Oc1cc2ccccc2c2ccccc12	low MW PAH SOA	phenanthren-9-ol	Positive	High	Positive*
97	lmp_21	O=N(=O)c1cc2ccccc2c2ccccc12	low MW PAH SOA	9-nitrophenanthrene	Positive	High	Positive
98	lmp_22	O=C1c2ccccc2-c2cccc(N(=O)=O)c2O1	low MW PAH SOA	4-nitro-6H-dibenzo[b,d]pyran-6-one	Positive	High	Positive
99	lmp_23	O=N(=O)c1ccc2ccc3cccc4ccc1c2c34	low MW PAH SOA		Positive	High	Positive
100	ara_01	O=NN1CCCC1c1cccnc1	Aromatic amine SOA	3-[(2S)-1-nitrosopyrrolidin-2-yl]pyridine	Positive	High	Positive*
101	ara_02	CN(CCCC(=O)c1cccnc1)N=O	Aromatic amine SOA	N-methyl-N-[4-oxo-4-(pyridin-3-yl)butyl]nitrous amide	Positive	High	Positive*
102	ara_03	CN(CCCC(O)c1cccnc1)N=O	Aromatic amine SOA	N-[4-hydroxy-4-(pyridin-3-yl)butyl]-N-methylnitrous amide	Positive	High	Positive
103	ara_04	O=NN1CCCCC1c1cccnc1	Aromatic amine SOA	3-(1-nitrosopiperidin-2-yl)pyridine	Positive	High
104	ara_05	O=NN1CC=CCC1c1cccnc1	Aromatic amine SOA	1-nitroso-1,2,3,6-tetrahydro-2,3'-bipyridine	Positive	High
