# Supplementary material for: Evaluating the mutagenic potential of aerosol organic compounds using informatics based screening
Source: Copernicus journal article supplement (doi:10.5194/acp-2017-574), 2017-07-17
Supplement: Supplementary file 5 [file TableS8b.xlsx]

## Sheet: Foglio1
Cluster	ID	Molecule	name	SOA class	SMILES	Cluster	Mutagenicity prediction	Prediction reliability	Mutagenicity experimental	MoA
Cluster_0	mtr_12		2,2-dimethyl-5-oxooxolane-3-carboxylic acid	Monoterpene	CC1(C)C(C(O)=O)CC(=O)O1	0	Positive	Moderate		AN2 >> Michael-type addition on alpha, beta-unsaturated carbonyl compounds >> Four- and Five-Membered Lactones_x000D_ SN2 >> Alkylation, ring opening SN2 reaction >> Four- and Five-Membered Lactones_x000D_ H-acceptor-path3-H-acceptor_x000D_ Oxolane
	mtr_11		(2,2-dimethyl-5-oxooxolan-3-yl)acetic acid	Monoterpene	CC1(C)C(CC(O)=O)CC(=O)O1	0	Positive	High		AN2 >> Michael-type addition on alpha, beta-unsaturated carbonyl compounds >> Four- and Five-Membered Lactones_x000D_ SN2 >> Alkylation, ring opening SN2 reaction >> Four- and Five-Membered Lactones_x000D_ H-acceptor-path3-H-acceptor_x000D_ Oxolane
	mtr_10		3-(2,2-dimethyl-5-oxooxolan-3-yl)propanoic acid	Monoterpene	CC1(C)C(CCC(O)=O)CC(=O)O1	0	Negative	Moderate		AN2 >> Michael-type addition on alpha, beta-unsaturated carbonyl compounds >> Four- and Five-Membered Lactones_x000D_ SN2 >> Alkylation, ring opening SN2 reaction >> Four- and Five-Membered Lactones_x000D_ H-acceptor-path3-H-acceptor_x000D_ Oxolane
Cluster_1	lmp_17		phenanthrene-1,4-dione	low MW PAH	O=C1C=CC(=O)c2ccc3ccccc3c12	1	Positive	Borderline		AN2 >> Michael-type addition, quinoid structures >> Quinones_x000D_ Non-covalent interaction >> DNA intercalation >> Quinones_x000D_ Radical >> Radical mechanism via ROS formation (indirect) >> Quinones_x000D_ Quinones_x000D_ H-acceptor-path3-H-acceptor_x000D_ Michael addition >> Polarised Alkenes-Michael addition >> Alpha, beta- unsaturated ketones_x000D_ Michael addition >> Quinones and Quinone…
	lmp_09		6,7-dihydroxynaphthalene-1,4-dione	low MW PAH	Oc1cc2c(cc1O)C(=O)C=CC2=O	1	Positive	High		AN2 >> Michael-type addition, quinoid structures >> Quinones_x000D_ Non-covalent interaction >> DNA intercalation >> Quinones_x000D_ Radical >> Radical mechanism via ROS formation (indirect) >> Quinones_x000D_ Quinones_x000D_ H-acceptor-path3-H-acceptor_x000D_ Michael addition >> Polarised Alkenes-Michael addition >> Alpha, beta- unsaturated ketones_x000D_ Michael addition >> Quinones and Quinone…
	lmp_02		naphthalene-1,4-dione	low MW PAH	O=C1C=CC(=O)c2ccccc12	1	Positive	High	Positive*	AN2 >> Michael-type addition, quinoid structures >> Quinones_x000D_ Non-covalent interaction >> DNA intercalation >> Quinones_x000D_ Radical >> Radical mechanism via ROS formation (indirect) >> Quinones_x000D_ Quinones_x000D_ H-acceptor-path3-H-acceptor_x000D_ Michael addition >> Polarised Alkenes-Michael addition >> Alpha, beta- unsaturated ketones_x000D_ Michael addition >> Quinones and Quinone…
Cluster_2	ara_04		3-(1-nitrosopiperidin-2-yl)pyridine	Aromatic amine	O=NN1CCCCC1c1cccnc1	2	Positive	High		SN1 >> Nucleophilic attack after carbenium ion formation >> N-Nitroso Compounds_x000D_ SN1 >> Nucleophilic attack after nitrenium and/or carbenium ion formation >> N-Nitroso Compounds_x000D_ Alkyl and aryl N-nitroso groups_x000D_ H-acceptor-path3-H-acceptor_x000D_ SN1 >> Carbenium Ion Formation >> N-Nitroso (alkylation)_x000D_ SN2 >> Nitrosation-SN2 >> Nitroso-SN2
	ara_05		1-nitroso-1,2,3,6-tetrahydro-2,3'-bipyridine	Aromatic amine	O=NN1CC=CCC1c1cccnc1	2	Positive	High		SN1 >> Nucleophilic attack after carbenium ion formation >> N-Nitroso Compounds_x000D_ SN1 >> Nucleophilic attack after nitrenium and/or carbenium ion formation >> N-Nitroso Compounds_x000D_ Alkyl and aryl N-nitroso groups_x000D_ H-acceptor-path3-H-acceptor_x000D_ SN1 >> Carbenium Ion Formation >> N-Nitroso (alkylation)_x000D_ SN2 >> Nitrosation-SN2 >> Nitroso-SN2
	ara_01		3-[(2S)-1-nitrosopyrrolidin-2-yl]pyridine	Aromatic amine	O=NN1CCCC1c1cccnc1	2	Positive	High	Positive*	SN1 >> Nucleophilic attack after carbenium ion formation >> N-Nitroso Compounds_x000D_ SN1 >> Nucleophilic attack after nitrenium and/or carbenium ion formation >> N-Nitroso Compounds_x000D_ Alkyl and aryl N-nitroso groups_x000D_ H-acceptor-path3-H-acceptor_x000D_ SN1 >> Carbenium Ion Formation >> N-Nitroso (alkylation)_x000D_ SN2 >> Nitrosation-SN2 >> Nitroso-SN2
	ara_02		N-methyl-N-[4-oxo-4-(pyridin-3-yl)butyl]nitrous amide	Aromatic amine	CN(CCCC(=O)c1cccnc1)N=O	2	Positive	High	Positive	SN1 >> Nucleophilic attack after carbenium ion formation >> N-Nitroso Compounds_x000D_ SN1 >> Nucleophilic attack after nitrenium and/or carbenium ion formation >> N-Nitroso Compounds_x000D_ Alkyl and aryl N-nitroso groups_x000D_ H-acceptor-path3-H-acceptor_x000D_ SN1 >> Carbenium Ion Formation >> N-Nitroso (alkylation)_x000D_ SN2 >> Nitrosation-SN2 >> Nitroso-SN2
	ara_03		N-[4-hydroxy-4-(pyridin-3-yl)butyl]-N-methylnitrous amide	Aromatic amine	CN(CCCC(O)c1cccnc1)N=O	2	Positive	High	Positive	SN1 >> Nucleophilic attack after carbenium ion formation >> N-Nitroso Compounds_x000D_ SN1 >> Nucleophilic attack after nitrenium and/or carbenium ion formation >> N-Nitroso Compounds_x000D_ Alkyl and aryl N-nitroso groups_x000D_ H-acceptor-path3-H-acceptor_x000D_ SN1 >> Carbenium Ion Formation >> N-Nitroso (alkylation)_x000D_ SN2 >> Nitrosation-SN2 >> Nitroso-SN2
Cluster_3	lmp_21		9-nitrophenanthrene	low MW PAH	O=N(=O)c1cc2ccccc2c2ccccc12	3	Positive	High	Positive	Non-covalent interaction >> DNA intercalation >> Fused-Ring Nitroaromatics_x000D_ Radical >> Radical mechanism via ROS formation (indirect) >> Fused-Ring Nitroaromatics_x000D_ SN1 >> Alkylation after metabolically formed carbenium ion species >> Polycyclic Aromatic Hydrocarbon Derivatives_x000D_ SN1 >> Nucleophilic attack after reduction and nitrenium ion formation >> Fused-Ring Nitroaromatics_x0…
	lmp_23			low MW PAH	O=N(=O)c1ccc2ccc3cccc4ccc1c2c34	3	Positive	High	Positive	Non-covalent interaction >> DNA intercalation >> Fused-Ring Nitroaromatics_x000D_ Radical >> Radical mechanism via ROS formation (indirect) >> Fused-Ring Nitroaromatics_x000D_ SN1 >> Alkylation after metabolically formed carbenium ion species >> Polycyclic Aromatic Hydrocarbon Derivatives_x000D_ SN1 >> Nucleophilic attack after reduction and nitrenium ion formation >> Fused-Ring Nitroaromatics_x0…
	lmp_20		phenanthren-9-ol	low MW PAH	Oc1cc2ccccc2c2ccccc12	3	Positive	High	Positive*	SN1 >> Alkylation after metabolically formed carbenium ion species >> Polycyclic Aromatic Hydrocarbon Derivatives_x000D_ SN2 >> Alkylation, direct acting epoxides and related after P450-mediated metabolic activation >> Polycyclic Aromatic Hydrocarbon Derivatives_x000D_ Polycyclic Aromatic Hydrocarbons_x000D_ SN1 >> Carbenium Ion Formation >> Polycyclic (PAHs) and heterocyclic (HACs) aromatic hydr…
	dic_09		2-(3-hydroxy-4-oxopentanoyl)-1,3,5-trimethyl-1H-imidazol-3-ium	Dicarbonyl (C2-C3)	CC1=CN{+}(C)=C(C(=O)CC(O)C(C)=O)N1C	3	Indeterminate	na		H-acceptor-path3-H-acceptor_x000D_ SN1 >> Iminium Ion Formation >> Aliphatic tertiary amines
	lmp_10		4-nitronaphthalen-1-ol	low MW PAH	Oc1ccc(N(=O)=O)c2ccccc12	3	Positive	High		Non-covalent interaction >> DNA intercalation >> Fused-Ring Nitroaromatics_x000D_ Radical >> Radical mechanism via ROS formation (indirect) >> Fused-Ring Nitroaromatics_x000D_ SN1 >> Nucleophilic attack after reduction and nitrenium ion formation >> Fused-Ring Nitroaromatics_x000D_ Nitro-aromatic_x000D_ SN1 >> Nitrenium Ion formation >> Aromatic nitro
	lmp_11		4-nitronaphthalene-1,8-diol	low MW PAH	Oc1cccc2c1c(O)ccc2N(=O)=O	3	Positive	High		Non-covalent interaction >> DNA intercalation >> Fused-Ring Nitroaromatics_x000D_ Radical >> Radical mechanism via ROS formation (indirect) >> Fused-Ring Nitroaromatics_x000D_ SN1 >> Nucleophilic attack after reduction and nitrenium ion formation >> Fused-Ring Nitroaromatics_x000D_ Nitro-aromatic_x000D_ SN1 >> Nitrenium Ion formation >> Aromatic nitro
Cluster_4	lmp_03		2-[(1Z)-3-oxoprop-1-en-1-yl]benzaldehyde	low MW PAH	O=CC=Cc1ccccc1C=O	4	Indeterminate	na		AN2 >> Nucleophilic addition to alpha, beta-unsaturated carbonyl compounds >> alpha, beta-Unsaturated Aldehydes_x000D_ AN2 >> Schiff base formation >> alpha, beta-Unsaturated Aldehydes_x000D_ Simple aldehyde
	lmp_15		2-[(1Z)-3-oxoprop-1-en-1-yl]naphthalene-1-carbaldehyde	low MW PAH	O=CC=Cc1ccc2ccccc2c1C=O	4	Indeterminate	na		AN2 >> Nucleophilic addition to alpha, beta-unsaturated carbonyl compounds >> alpha, beta-Unsaturated Aldehydes_x000D_ AN2 >> Schiff base formation >> alpha, beta-Unsaturated Aldehydes_x000D_ Simple aldehyde
	lmp_16		1-[(1Z)-3-oxoprop-1-en-1-yl]naphthalene-2-carbaldehyde	low MW PAH	O=CC=Cc1c2ccccc2ccc1C=O	4	Indeterminate	na		AN2 >> Nucleophilic addition to alpha, beta-unsaturated carbonyl compounds >> alpha, beta-Unsaturated Aldehydes_x000D_ AN2 >> Schiff base formation >> alpha, beta-Unsaturated Aldehydes_x000D_ Simple aldehyde
	lmp_04		(2E)-3-(2-formylphenyl)prop-2-enoic acid	low MW PAH	OC(=O)C=Cc1ccccc1C=O	4	Negative	Moderate		Simple aldehyde_x000D_ H-acceptor-path3-H-acceptor
	lmp_19		[1,1'-biphenyl]-2,2'-dicarbaldehyde	low MW PAH	O=Cc1ccccc1-c1ccccc1C=O	4	Indeterminate	na		Simple aldehyde
Cluster_5	mtr_04		[(1R,3R)-3-acetyl-2,2-dimethylcyclobutyl]acetaldehyde	Monoterpene	CC(=O)C1CC(CC=O)C1(C)C	5	Negative	Moderate		Simple aldehyde
	dic_02		1-hydroxy-2-oxoethyl hydrogen sulfate	Dicarbonyl (C2-C3)	OC(C=O)OS(O)(=O)=O	5	Indeterminate	na		Simple aldehyde_x000D_ H-acceptor-path3-H-acceptor
	mtr_20		5-formyl-6,6-dimethyl-2,7-dioxoheptan-3-yl hydrogen sulfate	Monoterpene	CC(=O)C(CC(C=O)C(C)(C)C=O)OS(O)(=O)=O	5	Negative	Borderline		Simple aldehyde_x000D_ H-acceptor-path3-H-acceptor
Cluster_6	mtr_26			Monoterpene	CC1(C)C(CC=O)CC1C1OC(C)(C2CC(CC(O)=O)C2(C)C)OO1	6	Negative	Moderate		Radical >> Radical mechanism by ROS formation (indirect) or direct radical attack on DNA >> Organic Peroxy Compounds_x000D_ Simple aldehyde_x000D_ H-acceptor-path3-H-acceptor
	mtr_27			Monoterpene	CC1(C)C2CCC3(C1C2)OC(CC1CC(C(O)=O)C1(C)C)OO3	6	Negative	High		Radical >> Radical mechanism by ROS formation (indirect) or direct radical attack on DNA >> Organic Peroxy Compounds_x000D_ H-acceptor-path3-H-acceptor
Cluster_7	mtr_25			Monoterpene	CC1(C)C(CC=O)CC1C1OCOO1	7	Positive	Moderate		Radical >> Radical mechanism by ROS formation (indirect) or direct radical attack on DNA >> Organic Peroxy Compounds_x000D_ Simple aldehyde_x000D_ H-acceptor-path3-H-acceptor
	alb_09		8-hydroxy-1,3,5-trimethyl-6,7-dioxabicyclo[3.2.1]oct-3-en-2-one	Alkylbenzene	CC1=CC2(C)C(O)C(C)(C1=O)OO2	7	Positive	Moderate		Radical >> Radical mechanism by ROS formation (indirect) or direct radical attack on DNA >> Organic Peroxy Compounds_x000D_ alpha,beta-unsaturated carbonyls_x000D_ H-acceptor-path3-H-acceptor_x000D_ Michael addition >> Polarised Alkenes-Michael addition >> Alpha, beta- unsaturated ketones
	alb_12		3-(2-hydroperoxy-1-hydroxy-3-oxobutyl)-2-methyloxirane-2-carbaldehyde	Alkylbenzene	CC(=O)C(C(O)C1C(C)(C=O)O1)OO	7	Positive	High		Radical >> Radical mechanism by ROS formation (indirect) or direct radical attack on DNA >> Organic Peroxy Compounds_x000D_ SN2 >> Alkylation, direct acting epoxides and related >> Epoxides and Aziridines_x000D_ Alkyl hydroperoxides_x000D_ Epoxides and aziridines_x000D_ Simple aldehyde_x000D_ H-acceptor-path3-H-acceptor_x000D_ SN2 >> Direct Acting Epoxides and related >> Epoxides
	alb_13		3-(1-hydroxy-2,3-dioxobutyl)-2-methyloxirane-2-carbaldehyde	Alkylbenzene	CC(=O)C(=O)C(O)C1C(C)(C=O)O1	7	Positive	High		AN2 >> Schiff base formation >> Dicarbonyl compounds_x000D_ SN2 >> Alkylation, direct acting epoxides and related >> Epoxides and Aziridines_x000D_ Epoxides and aziridines_x000D_ Simple aldehyde_x000D_ H-acceptor-path3-H-acceptor_x000D_ Schiff base formers >> Direct Acting Schiff Base Formers >> Alpha-beta-dicarbonyl_x000D_ SN2 >> Direct Acting Epoxides and related >> Epoxides
	alb_05		2-hydroxy-1-methyl-7-oxabicyclo[4.1.0]hept-4-en-3-one	Alkylbenzene	CC12C(C=CC(=O)C1O)O2	7	Positive	Moderate		SN2 >> Alkylation, direct acting epoxides and related >> Epoxides and Aziridines_x000D_ Epoxides and aziridines_x000D_ alpha,beta-unsaturated carbonyls_x000D_ H-acceptor-path3-H-acceptor_x000D_ Michael addition >> Polarised Alkenes-Michael addition >> Alpha, beta- unsaturated ketones_x000D_ SN2 >> Direct Acting Epoxides and related >> Epoxides
	alb_14		2-methyl-3-[(2E)-4-oxopent-2-en-2-yl]oxirane-2-carbaldehyde	Alkylbenzene	CC(=CC(C)=O)C1C(C)(C=O)O1	7	Positive	Moderate		SN2 >> Alkylation, direct acting epoxides and related >> Epoxides and Aziridines_x000D_ Epoxides and aziridines_x000D_ Simple aldehyde_x000D_ alpha,beta-unsaturated carbonyls_x000D_ H-acceptor-path3-H-acceptor_x000D_ SN2 >> Direct Acting Epoxides and related >> Epoxides
Cluster_8	alb_16		2,3,4-trihydroxy-2,4-dimethyl-5,6-dioxoheptanoic acid	Alkylbenzene	CC(=O)C(=O)C(C)(O)C(O)C(C)(O)C(O)=O	8	Negative	High		AN2 >> Schiff base formation >> Dicarbonyl compounds_x000D_ H-acceptor-path3-H-acceptor_x000D_ Schiff base formers >> Direct Acting Schiff Base Formers >> Alpha-beta-dicarbonyl
	mtr_21		6-hydroperoxy-1-hydroxy-5-(hydroxymethyl)-6-methylheptane-2,3-dione	Monoterpene	CC(C)(C(CC(=O)C(=O)CO)CO)OO	8	Negative	Moderate		AN2 >> Schiff base formation >> Dicarbonyl compounds_x000D_ Radical >> Radical mechanism by ROS formation (indirect) or direct radical attack on DNA >> Organic Peroxy Compounds_x000D_ Alkyl hydroperoxides_x000D_ H-acceptor-path3-H-acceptor_x000D_ Schiff base formers >> Direct Acting Schiff Base Formers >> Alpha-beta-dicarbonyl
	mtr_24			Monoterpene	CC(=O)C(=O)C1CC(C(=O)OO)(OO)C1(C)C	8	Positive	Moderate		AN2 >> Schiff base formation >> Dicarbonyl compounds_x000D_ Radical >> Radical mechanism by ROS formation (indirect) or direct radical attack on DNA >> Organic Peroxy Compounds_x000D_ Alkyl hydroperoxides_x000D_ H-acceptor-path3-H-acceptor_x000D_ Schiff base formers >> Direct Acting Schiff Base Formers >> Alpha-beta-dicarbonyl
	ken_03		7-hydroxy-5,6-dioxoheptaneperoxoic acid	Alkenes ozonolysis	OCC(=O)C(=O)CCCC(=O)OO	8	Indeterminate	na		AN2 >> Schiff base formation >> Dicarbonyl compounds_x000D_ Alkyl hydroperoxides_x000D_ H-acceptor-path3-H-acceptor_x000D_ Schiff base formers >> Direct Acting Schiff Base Formers >> Alpha-beta-dicarbonyl
	ken_02		2-hydroperoxy-7-hydroxy-5,6-dioxoheptaneperoxoic acid	Alkenes ozonolysis	OCC(=O)C(=O)CCC(C(=O)OO)OO	8	Indeterminate	na		AN2 >> Schiff base formation >> Dicarbonyl compounds_x000D_ Radical >> Radical mechanism by ROS formation (indirect) or direct radical attack on DNA >> Organic Peroxy Compounds_x000D_ Alkyl hydroperoxides_x000D_ H-acceptor-path3-H-acceptor_x000D_ Schiff base formers >> Direct Acting Schiff Base Formers >> Alpha-beta-dicarbonyl
	alb_10		3-hydroperoxy-4-hydroxy-3,5-dimethyloxolan-2-one	Alkylbenzene	CC1C(O)C(C)(OO)C(=O)O1	8	Positive	High		AN2 >> Michael-type addition on alpha, beta-unsaturated carbonyl compounds >> Four- and Five-Membered Lactones_x000D_ Radical >> Radical mechanism by ROS formation (indirect) or direct radical attack on DNA >> Organic Peroxy Compounds_x000D_ SN2 >> Alkylation, ring opening SN2 reaction >> Four- and Five-Membered Lactones_x000D_ Alkyl hydroperoxides_x000D_ H-acceptor-path3-H-acceptor_x000D_ Oxolane
	alb_11		4-hydroperoxy-2,4-dimethyl-5-oxooxolan-3-yl nitrate	Alkylbenzene	CC1C(ON(=O)=O)C(C)(OO)C(=O)O1	8	Indeterminate	na		AN2 >> Michael-type addition on alpha, beta-unsaturated carbonyl compounds >> Four- and Five-Membered Lactones_x000D_ Radical >> Radical mechanism by ROS formation (indirect) or direct radical attack on DNA >> Organic Peroxy Compounds_x000D_ SN2 >> Alkylation, ring opening SN2 reaction >> Four- and Five-Membered Lactones_x000D_ Alkyl hydroperoxides_x000D_ H-acceptor-path3-H-acceptor_x000D_ Oxolane
	alb_06		2-hydroperoxy-1,5-dimethyl-6,7-dioxabicyclo[3.2.1]oct-3-ene-2,8-diol	Alkylbenzene	CC12C=CC(O)(OO)C(C)(C1O)OO2	8	Positive	Moderate		Radical >> Radical mechanism by ROS formation (indirect) or direct radical attack on DNA >> Organic Peroxy Compounds_x000D_ Alkyl hydroperoxides_x000D_ H-acceptor-path3-H-acceptor
	mtr_22		5-(2-hydroperoxypropan-2-yl)-3-hydroxy-2-methylcyclohex-2-en-1-one	Monoterpene	CC1=C(O)CC(C(C)(C)OO)CC1=O	8	Indeterminate	na		Radical >> Radical mechanism by ROS formation (indirect) or direct radical attack on DNA >> Organic Peroxy Compounds_x000D_ Alkyl hydroperoxides_x000D_ alpha,beta-unsaturated carbonyls_x000D_ H-acceptor-path3-H-acceptor
	mtr_03		3-hydroperoxy-6,6-dimethylbicyclo[3.1.1]heptan-2-one	Monoterpene	CC1(C)C2CC1CC(OO)C2=O	8	Indeterminate	na		Radical >> Radical mechanism by ROS formation (indirect) or direct radical attack on DNA >> Organic Peroxy Compounds_x000D_ Alkyl hydroperoxides_x000D_ H-acceptor-path3-H-acceptor
	alb_08		4-hydroperoxy-1,3,5-trimethyl-6,7-dioxabicyclo[3.2.1]oct-2-en-8-ol	Alkylbenzene	CC1=CC2(C)C(O)C(C)(C1OO)OO2	8	Positive	Moderate		Radical >> Radical mechanism by ROS formation (indirect) or direct radical attack on DNA >> Organic Peroxy Compounds_x000D_ Alkyl hydroperoxides_x000D_ H-acceptor-path3-H-acceptor
	ken_01		1-[(1-{[1-(ethylperoxy)ethyl]peroxy}ethyl)peroxy]ethane-1-peroxol	Alkenes ozonolysis	CCOOC(C)OOC(C)OOC(C)OO	8	Positive	Moderate		Radical >> Radical mechanism by ROS formation (indirect) or direct radical attack on DNA >> Organic Peroxy Compounds_x000D_ Alkyl hydroperoxides_x000D_ H-acceptor-path3-H-acceptor
	mtr_23			Monoterpene	CC(=O)C(C1CC(C(=O)OO)(OO)C1(C)C)OO	8	Negative	Moderate		Radical >> Radical mechanism by ROS formation (indirect) or direct radical attack on DNA >> Organic Peroxy Compounds_x000D_ Alkyl hydroperoxides_x000D_ H-acceptor-path3-H-acceptor
Cluster_9_0	mtr_15			Monoterpene	CC1(C)C(C(O)=O)CC1CC(=O)OC(C)(C)C(CC(O)=O)CC(O)=O	cluster_9_0	Negative	Moderate		H-acceptor-path3-H-acceptor
	mtr_16			Monoterpene	CC1(C)C(C(O)=O)CC1CC(=O)OC(C)(C)C(CC(O)=O)C(O)=O	cluster_9_0	Negative	Moderate		H-acceptor-path3-H-acceptor
Cluster_9_1	kan_04		1-(5-butyl-2,3-dihydroxyoxolan-2-yl)hexan-3-yl nitrate	Alkane photooxidation	CCCCC1CC(O)C(O)(CCC(CCC)ON(=O)=O)O1	cluster_9_1	Negative	Moderate		H-acceptor-path3-H-acceptor_x000D_ Oxolane
	kan_05		1-(5-butyl-2-hydroxy-3-oxooxolan-2-yl)hexan-3-yl nitrate	Alkane photooxidation	CCCCC1CC(=O)C(O)(CCC(CCC)ON(=O)=O)O1	cluster_9_1	Negative	Moderate		H-acceptor-path3-H-acceptor_x000D_ Oxolane
	kan_02		4-oxotetradecan-7-yl nitrate	Alkane photooxidation	CCCCCCCC(CCC(=O)CCC)ON(=O)=O	cluster_9_1	Negative	High
	kan_01		tetradecane-4,7-diyl dinitrate	Alkane photooxidation	CCCCCCCC(CCC(CCC)ON(=O)=O)ON(=O)=O	cluster_9_1	Negative	Moderate
	kan_03			Alkane photooxidation	CCCCC(CCC(O)CCC(CCC)ON(=O)=O)ON(=O)=O	cluster_9_1	Negative	Moderate
	kan_06		1-(5-butyl-4,5-dihydrofuran-2-yl)hexan-3-yl nitrate	Alkane photooxidation	CCCCC1CC=C(CCC(CCC)ON(=O)=O)O1	cluster_9_1	Negative	High
Cluster_9_2	lmp_22		4-nitro-6H-dibenzo[b,d]pyran-6-one	low MW PAH	O=C1c2ccccc2-c2cccc(N(=O)=O)c2O1	cluster_9_2	Positive	High	Positive	Nitro-aromatic_x000D_ H-acceptor-path3-H-acceptor_x000D_ SN1 >> Nitrenium Ion formation >> Aromatic nitro
	lmp_18		phenanthrene-9,10-dione	low MW PAH	O=C1c2ccccc2-c2ccccc2C1=O	cluster_9_2	Negative	Moderate	Negative	9,10-dihydrophenanthrenes_x000D_ H-acceptor-path3-H-acceptor_x000D_ Schiff base formers >> Direct Acting Schiff Base Formers >> Alpha-beta-dicarbonyl
	lmp_13		6H-dibenzo[b,d]pyran-6-one	low MW PAH	O=C1c2ccccc2-c2ccccc2O1	cluster_9_2	Indeterminate	na		H-acceptor-path3-H-acceptor
	lmp_14		naphtho[1,2-c]furan-1,3-dione	low MW PAH	O=C1c2ccc3ccccc3c2C(=O)O1	cluster_9_2	Indeterminate	na		H-acceptor-path3-H-acceptor
	alb_02		2-methylphenol	Alkylbenzene	Cc1ccccc1O	cluster_9_2	Negative	High	Negative	Michael addition >> P450 Mediated Activation to Quinones and Quinone-type Chemicals >> Alkyl phenols
	alb_03		3,5-dimethylbenzene-1,2-diol	Alkylbenzene	Cc1cc(C)cc(O)c1O	cluster_9_2	Negative	Moderate		H-acceptor-path3-H-acceptor_x000D_ Michael addition >> P450 Mediated Activation to Quinones and Quinone-type Chemicals >> Alkyl phenols_x000D_ Michael addition >> P450 Mediated Activation to Quinones and Quinone-type Chemicals >> Hydroquinones
	alb_04		3,5-dimethylbenzoic acid	Alkylbenzene	Cc1cc(C)cc(C(O)=O)c1	cluster_9_2	Negative	High		H-acceptor-path3-H-acceptor
	lmp_12		1-hydroxy-1,2-dihydronaphthalen-2-yl nitrate	low MW PAH	OC1C(ON(=O)=O)C=Cc2ccccc12	cluster_9_2	Positive	High		H-acceptor-path3-H-acceptor
	alb_01		2-nitrophenol	Alkylbenzene	Oc1ccccc1N(=O)=O	cluster_9_2	Negative	High	Negative	Radical >> Radical mechanism via ROS formation (indirect) >> Nitrophenols, Nitrophenyl Ethers and Nitrobenzoic Acids_x000D_ SN1 >> Nucleophilic attack after reduction and nitrenium ion formation >> Nitrophenols, Nitrophenyl Ethers and Nitrobenzoic Acids_x000D_ Nitro-aromatic_x000D_ H-acceptor-path3-H-acceptor_x000D_ SN1 >> Nitrenium Ion formation >> Aromatic nitro
	lmp_05		2-[(E)-2-carboxyethenyl]benzoic acid	low MW PAH	OC(=O)C=Cc1ccccc1C(O)=O	cluster_9_2	Negative	High		H-acceptor-path3-H-acceptor
	lmp_07		benzene-1,2-dicarboxylic acid	low MW PAH	OC(=O)c1ccccc1C(O)=O	cluster_9_2	Negative	High	Negative	H-acceptor-path3-H-acceptor
	lmp_06		(2E)-3-(2,5-dihydroxyphenyl)prop-2-enoic acid	low MW PAH	Oc1ccc(O)cc1C=CC(O)=O	cluster_9_2	Negative	High		H-acceptor-path3-H-acceptor_x000D_ Michael addition >> P450 Mediated Activation to Quinones and Quinone-type Chemicals >> Hydroquinones
	lmp_08		3,6-dihydroxybenzene-1,2-dicarboxylic acid	low MW PAH	Oc1ccc(O)c(C(O)=O)c1C(O)=O	cluster_9_2	Negative	High		H-acceptor-path3-H-acceptor_x000D_ Michael addition >> P450 Mediated Activation to Quinones and Quinone-type Chemicals >> Hydroquinones
	lmp_01		naphthalen-1-ol	low MW PAH	Oc1cccc2ccccc12	cluster_9_2	Positive	High	Positive*
Cluster_9_3	iso_05		3-methyloxolane-3,4-diol	Isoprene	CC1(O)COCC1O	cluster_9_3	Indeterminate	na		H-acceptor-path3-H-acceptor_x000D_ Oxolane
	mtr_02		2,6,6-trimethyl-3-(nitrooxy)bicyclo[3.1.1]heptan-2-yl hydrogen sulfate	Monoterpene	CC1(C)C2CC1CC(ON(=O)=O)C2(C)OS(O)(=O)=O	cluster_9_3	Negative	Moderate		H-acceptor-path3-H-acceptor
	mtr_09		{(1R,3R)-2,2-dimethyl-3-[(sulfooxy)carbonyl]cyclobutyl}acetic acid	Monoterpene	CC1(C)C(C(=O)OS(O)(=O)=O)CC1CC(O)=O	cluster_9_3	Negative	Borderline		H-acceptor-path3-H-acceptor
	mtr_28		3-(3-methyl-1,2,4-trioxolan-3-yl)-6-oxoheptanoic acid	Monoterpene	CC(=O)CCC(CC(O)=O)C1(C)OCOO1	cluster_9_3	Positive	Moderate		Radical >> Radical mechanism by ROS formation (indirect) or direct radical attack on DNA >> Organic Peroxy Compounds_x000D_ H-acceptor-path3-H-acceptor
	alb_07		8-hydroxy-1,3,5-trimethyl-6,7-dioxabicyclo[3.2.1]oct-3-en-2-yl nitrate	Alkylbenzene	CC1=CC2(C)C(O)C(C)(C1ON(=O)=O)OO2	cluster_9_3	Positive	Moderate		Radical >> Radical mechanism by ROS formation (indirect) or direct radical attack on DNA >> Organic Peroxy Compounds_x000D_ H-acceptor-path3-H-acceptor
	mtr_08		{(1R,3R)-2,2-dimethyl-3-[(nitroperoxy)carbonyl]cyclobutyl}acetic acid	Monoterpene	CC1(C)C(C(=O)OON(=O)=O)CC1CC(O)=O	cluster_9_3	Indeterminate	na		H-acceptor-path3-H-acceptor
	mtr_01		3-hydroxy-2,6,6-trimethylbicyclo[3.1.1]heptan-2-yl nitrate	Monoterpene	CC1(C)C2CC1CC(O)C2(C)ON(=O)=O	cluster_9_3	Indeterminate	na		H-acceptor-path3-H-acceptor
	str_01		4-[2-(2-carboxyethyl)-3,3-dimethylcyclobutyl]-4-oxobutanoic acid	Sesquiterpene	CC1(C)CC(C(=O)CCC(O)=O)C1CCC(O)=O	cluster_9_3	Negative	High		H-acceptor-path3-H-acceptor
	mtr_06		[(1R,3R)-3-(hydroxyacetyl)-2,2-dimethylcyclobutyl]acetic acid	Monoterpene	CC1(C)C(C(=O)CO)CC1CC(O)=O	cluster_9_3	Negative	High		H-acceptor-path3-H-acceptor
	mtr_07		(1R,3R)-3-(carboxymethyl)-2,2-dimethylcyclobutane-1-carboxylic acid	Monoterpene	CC1(C)C(C(O)=O)CC1CC(O)=O	cluster_9_3	Negative	High		H-acceptor-path3-H-acceptor
	mtr_05		[(1R,3R)-3-acetyl-2,2-dimethylcyclobutyl]acetic acid	Monoterpene	CC(=O)C1CC(CC(O)=O)C1(C)C	cluster_9_3	Negative	High		H-acceptor-path3-H-acceptor
	mtr_31		[2,2-dimethyl-3-(2-oxopropyl)cyclopropyl]acetic acid	Monoterpene	CC(=O)CC1C(CC(O)=O)C1(C)C	cluster_9_3	Negative	High		H-acceptor-path3-H-acceptor
	iso_08		3-hydroxy-2-methyl-1-(nitroperoxy)-1-oxopropan-2-yl nitrate	Isoprene	CC(CO)(C(=O)OON(=O)=O)ON(=O)=O	cluster_9_3	Indeterminate	na		H-acceptor-path3-H-acceptor
	dic_03		1-hydroxy-2-oxopropyl hydrogen sulfate	Dicarbonyl (C2-C3)	CC(=O)C(O)OS(O)(=O)=O	cluster_9_3	Indeterminate	na		H-acceptor-path3-H-acceptor
	iso_03		2,3-dihydroxy-3-methyl-4-(nitrooxy)butyl hydrogen sulfate	Isoprene	CC(O)(CON(=O)=O)C(O)COS(O)(=O)=O	cluster_9_3	Indeterminate	na		H-acceptor-path3-H-acceptor
	iso_02		2,3,4-trihydroxy-3-methylbutyl hydrogen sulfate	Isoprene	CC(O)(CO)C(O)COS(O)(=O)=O	cluster_9_3	Negative	Moderate		H-acceptor-path3-H-acceptor
	iso_07		3-hydroxy-2-methyl-2-(sulfooxy)propanoic acid	Isoprene	CC(CO)(C(O)=O)OS(O)(=O)=O	cluster_9_3	Negative	Moderate		H-acceptor-path3-H-acceptor
	mtr_29		3-acetyl-6-oxoheptanoic acid	Monoterpene	CC(=O)CCC(CC(O)=O)C(C)=O	cluster_9_3	Negative	High		H-acceptor-path3-H-acceptor
	mtr_30		3-acetylhexanedioic acid	Monoterpene	CC(=O)C(CCC(O)=O)CC(O)=O	cluster_9_3	Negative	High		H-acceptor-path3-H-acceptor
	mtr_19		2-hydroxy-4-(propan-2-yl)hexanedioic acid	Monoterpene	CC(C)C(CC(O)C(O)=O)CC(O)=O	cluster_9_3	Negative	High		H-acceptor-path3-H-acceptor
	mtr_14		3-[2-(acetyloxy)propan-2-yl]pentanedioic acid	Monoterpene	CC(=O)OC(C)(C)C(CC(O)=O)CC(O)=O	cluster_9_3	Negative	Moderate		SN1 >> Nucleophilic attack after carbenium ion formation >> Specific Acetate Esters_x000D_ SN2 >> Acylation >> Specific Acetate Esters_x000D_ SN2 >> Nucleophilic substitution at sp3 Carbon atom >> Specific Acetate Esters_x000D_ H-acceptor-path3-H-acceptor
	mtr_18		3-hydroxy-2,2-dimethylpentanedioic acid	Monoterpene	CC(C)(C(O)CC(O)=O)C(O)=O	cluster_9_3	Negative	High		H-acceptor-path3-H-acceptor
	mtr_17		3-methylbutane-1,2,3-tricarboxylic acid	Monoterpene	CC(C)(C(CC(O)=O)C(O)=O)C(O)=O	cluster_9_3	Negative	High		H-acceptor-path3-H-acceptor
	alb_15		(4E)-2,3-dihydroxy-2,4-dimethyl-6-oxohept-4-enoic acid	Alkylbenzene	CC(=CC(C)=O)C(O)C(C)(O)C(O)=O	cluster_9_3	Negative	High		alpha,beta-unsaturated carbonyls_x000D_ H-acceptor-path3-H-acceptor
	dic_08		2-hydroxy-2-[(3-oxobutan-2-yl)oxy]propanoic acid	Dicarbonyl (C2-C3)	CC(C(C)=O)OC(C)(O)C(O)=O	cluster_9_3	Negative	Moderate		H-acceptor-path3-H-acceptor
	mtr_13		3-(2-hydroxypropan-2-yl)pentanedioic acid	Monoterpene	CC(C)(O)C(CC(O)=O)CC(O)=O	cluster_9_3	Negative	High		H-acceptor-path3-H-acceptor
	alb_17		2-hydroxy-2,4-dimethyl-3-oxopentanedioic acid	Alkylbenzene	CC(C(=O)C(C)(O)C(O)=O)C(O)=O	cluster_9_3	Negative	High		H-acceptor-path3-H-acceptor
	dic_07		2,3-dihydroxy-2,3-dimethylbutanedioic acid	Dicarbonyl (C2-C3)	CC(O)(C(O)=O)C(C)(O)C(O)=O	cluster_9_3	Negative	High		H-acceptor-path3-H-acceptor
	dic_06		2,3-dihydroxy-2-methylbutanedioic acid	Dicarbonyl (C2-C3)	CC(O)(C(O)C(O)=O)C(O)=O	cluster_9_3	Negative	High		H-acceptor-path3-H-acceptor
	iso_01		2-methylbutane-1,2,3,4-tetrol	Isoprene	CC(O)(CO)C(O)CO	cluster_9_3	Negative	High		H-acceptor-path3-H-acceptor
	iso_06		2,3-dihydroxy-2-methylpropanoic acid	Isoprene	CC(O)(CO)C(O)=O	cluster_9_3	Negative	High		H-acceptor-path3-H-acceptor
	dic_01		ethane-1,1,2,2-tetrol	Dicarbonyl (C2-C3)	OC(O)C(O)O	cluster_9_3	Positive	Borderline		H-acceptor-path3-H-acceptor
	iso_04		(3E)-3-methylbut-3-ene-1,2,4-triol	Isoprene	CC(=CO)C(O)CO	cluster_9_3	Negative	Moderate		H-acceptor-path3-H-acceptor
	dic_04		hydroxypropanedioic acid	Dicarbonyl (C2-C3)	OC(C(O)=O)C(O)=O	cluster_9_3	Negative	High		H-acceptor-path3-H-acceptor
	dic_05		2-oxobutanedioic acid	Dicarbonyl (C2-C3)	OC(=O)CC(=O)C(O)=O	cluster_9_3	Negative	High		H-acceptor-path3-H-acceptor
	alb_18		(2Z)-2-methylbut-2-enedioic acid	Alkylbenzene	CC(=CC(O)=O)C(O)=O	cluster_9_3	Negative	High		H-acceptor-path3-H-acceptor
